# Supplementary material for: Visible-light induced decarboxylative alkylation of quinoxalin-2(1H)-ones at the C3-position
Source: Royal Society of Chemistry journal article supplement (doi:10.1039/c9ob01169b), 2019-01-01

# Visible-Light Induced Decarboxylative Alkylation of Quinoxalin-2(1*H*)-ones at C3-position

Wenxuan Xue,<sup>a</sup> Yingpeng Su,<sup>a</sup> Ke-Hu Wang,<sup>a</sup> Rong Zhang,<sup>a</sup> Yawei Feng,<sup>a</sup> Lindan  
Cao,<sup>a</sup> Danfeng Huang,<sup>a</sup> and Yulai Hu<sup>a,b\*</sup>

<sup>a</sup>College of Chemistry and Chemical Engineering, Northwest Normal University, 967  
Anning East Road, Lanzhou 730070, P. R. China

<sup>b</sup>State Key Laboratory of Applied Organic Chemistry, Lanzhou University, Lanzhou  
730000, P. R. China

\*E-mail: huyl@nwnu.edu.cn.

## Table of Contents

|                                           |    |
|-------------------------------------------|----|
| 1. Control experiments.....               | 2  |
| 2. Gram-scale Reaction.....               | 4  |
| 3. Cyclic Voltammetry Experiment.....     | 4  |
| 4. Emission quenching experiment.....     | 6  |
| 5. NMR copies of compounds <b>3</b> ..... | 7  |
| 6. NMR copies of compounds <b>5</b> ..... | 31 |
| 7. NMR copies of compound <b>6</b> .....  | 45 |
| 8. NMR copies of compounds <b>7</b> ..... | 46 |

# 1. Control experiments.

## 1.1. Reaction of 1a with $\text{PhI}(\text{OAc})_2$ , $\text{Ru}(\text{bpy})_3\text{Cl}_2 \cdot 6\text{H}_2\text{O}$ in $\text{DMSO-}d_6$ under visible-light.

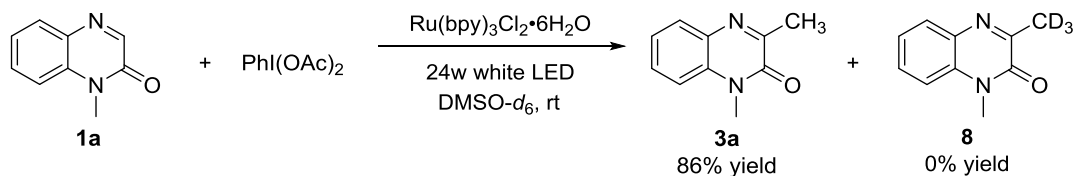

In a dried Schlenk tube, 1-methylquinoxalin-2(1*H*)-one (0.2 mmol),  $\text{PhI}(\text{OAc})_2$  (2.5 equiv) and  $\text{Ru}(\text{bpy})_3\text{Cl}_2 \cdot 6\text{H}_2\text{O}$  (2.0 mg, 0.01 equiv) were mixed in  $\text{DMSO-}d_6$  (2.0 mL) at room temperature. The tube was placed at a distance (app. 5 cm) from 24 W white LED, and the solution was stirred under visible-light irradiation. After the reaction was completed (monitored by TLC), the reaction mixture was quenched by saturated aqueous  $\text{Na}_2\text{CO}_3$  solution (5 mL), and then the mixture was extracted with ethyl acetate ( $3 \times 5$  mL). The combined organic phase was dried over anhydrous  $\text{MgSO}_4$  and evaporated under vacuum. The crude product was purified by column chromatography over silica gel (230–400 mesh) using EtOAc/petroleum ether as eluent to afford the 3-methylquinoxalin-2(1*H*)-ones without deuterated product after detecting by  $^1\text{H}$  NMR.

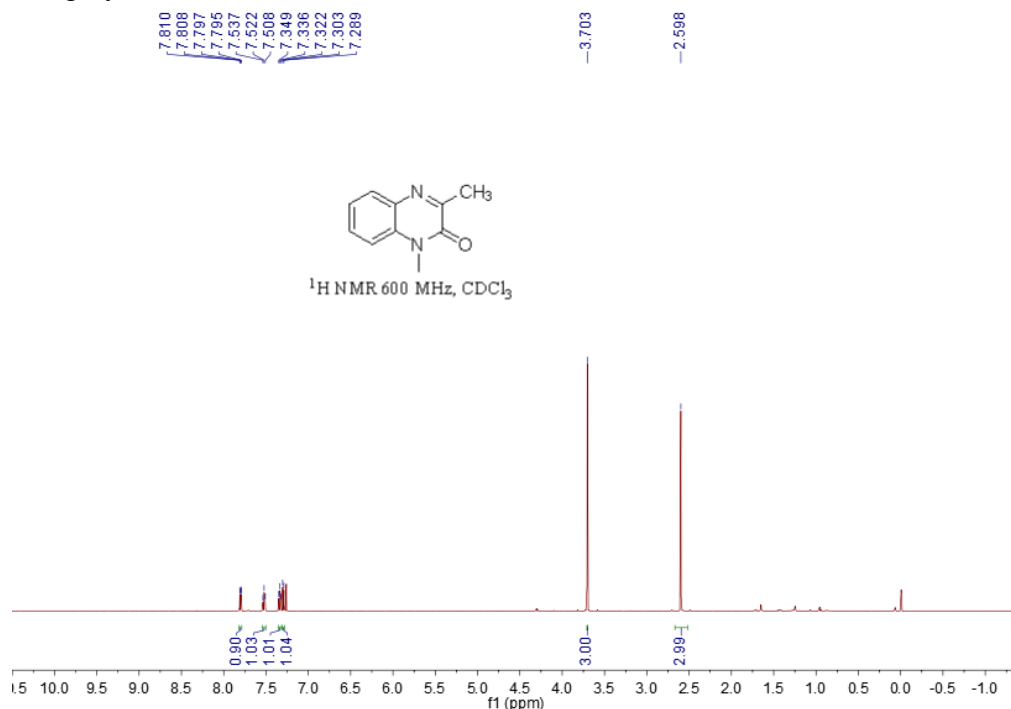

## 1.2. Reaction of TEMPO with $\text{PhI}(\text{OAc})_2$ , $\text{Ru}(\text{bpy})_3\text{Cl}_2 \cdot 6\text{H}_2\text{O}$ and **1a** under visible-light.

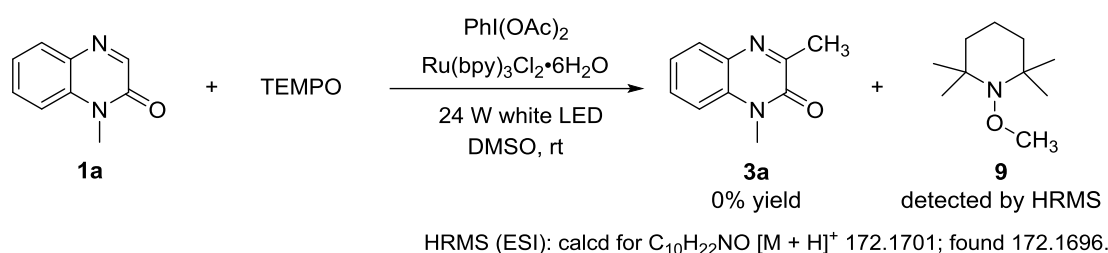

In a dried Schlenk tube, 1-methylquinoxalin-2(1H)-one (0.2 mmol), TEMPO (2.0 equiv),  $\text{PhI}(\text{OAc})_2$  (2.5 equiv) and  $\text{Ru}(\text{bpy})_3\text{Cl}_2 \cdot 6\text{H}_2\text{O}$  (2.0 mg, 0.01 equiv) were mixed in DMSO (2.0 mL) at room temperature. The tube was placed at a distance (app. 5 cm) from 24 W white LED, and the solution was stirred under visible-light irradiation. The mixture was stirred at r.t. for 10 h. TLC shows that the product **3a** was not formed and TEMPO- $\text{CH}_3$  adduct **9** was detected by HRMS.

### User Spectra

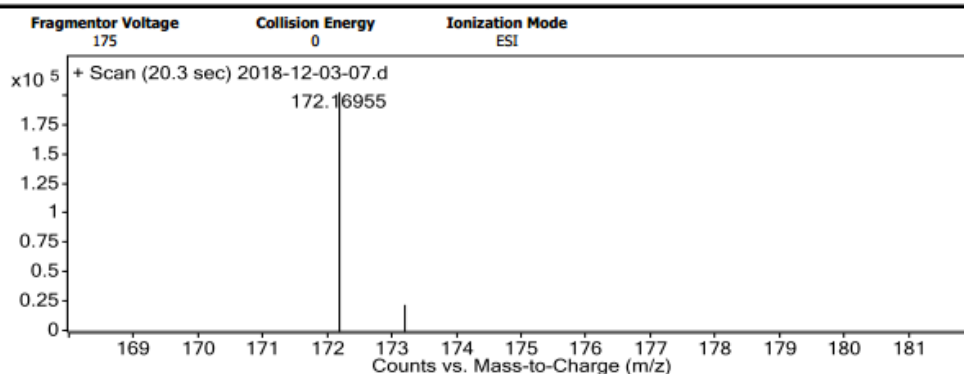

### Peak List

| m/z       | z | Abund     | Formula                               | Ion                     |
|-----------|---|-----------|---------------------------------------|-------------------------|
| 140.14339 |   | 90392.9   |                                       |                         |
| 142.15869 | 1 | 4480498.5 |                                       |                         |
| 142.26701 |   | 200766.6  |                                       |                         |
| 142.30001 |   | 112689.1  |                                       |                         |
| 143.16246 | 1 | 479416.1  |                                       |                         |
| 156.13854 |   | 66148.9   |                                       |                         |
| 156.17374 |   | 99589.5   |                                       |                         |
| 172.16955 |   | 203080.9  | $\text{C}_{10}\text{H}_{22}\text{NO}$ | $(\text{M}+\text{H})^+$ |
| 263.21157 |   | 51486.3   |                                       |                         |
| 319.28696 |   | 87736.1   |                                       |                         |
| 379.29886 | 1 | 621362.9  |                                       |                         |
| 380.3017  | 1 | 138397.1  |                                       |                         |
| 462.36833 |   | 95275.6   |                                       |                         |
| 496.40994 | 1 | 165619.2  |                                       |                         |
| 497.4124  | 1 | 53668.1   |                                       |                         |
| 559.49375 | 1 | 268253.1  |                                       |                         |
| 560.49738 | 1 | 100862.3  |                                       |                         |
| 651.50539 |   | 75414.8   |                                       |                         |
| 734.4075  | 1 | 129546.4  |                                       |                         |
| 735.41103 | 1 | 46656.2   |                                       |                         |

## 2. Gram-scale Reaction

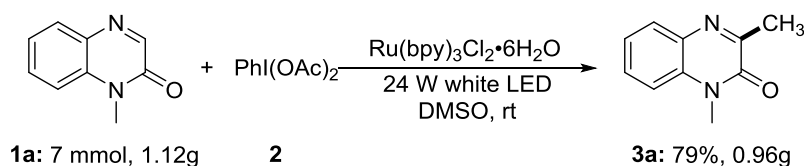

In a dried round-bottomed flask, quinoxalin-2(1H)-ones (1.12g, 7.0 mmol),  $\text{PhI}(\text{OAc})_2$  (5.635g, 17.5 mmol) and  $\text{Ru}(\text{bpy})_3\text{Cl}_2 \cdot 6\text{H}_2\text{O}$  (52 mg, 1.0 mol%) were mixed in DMSO (70.0 mL) at room temperature. The flask was placed at a distance (app. 5 cm) from 24 W white LED, and the solution was stirred under visible-light irradiation. After the reaction was completed (monitored by TLC), the reaction mixture was quenched by saturated aqueous  $\text{Na}_2\text{CO}_3$  solution (50 mL), and then the mixture was extracted with ethyl acetate ( $3 \times 50$  mL). The combined organic phase was dried over anhydrous  $\text{MgSO}_4$  and evaporated under vacuum. The crude product was purified by column chromatography over silica gel (230–400 mesh) using EtOAc/petroleum ether as eluent to afford the desired products **3a** (0.96g, 79% yield).

## 3. Cyclic Voltammetry Experiment

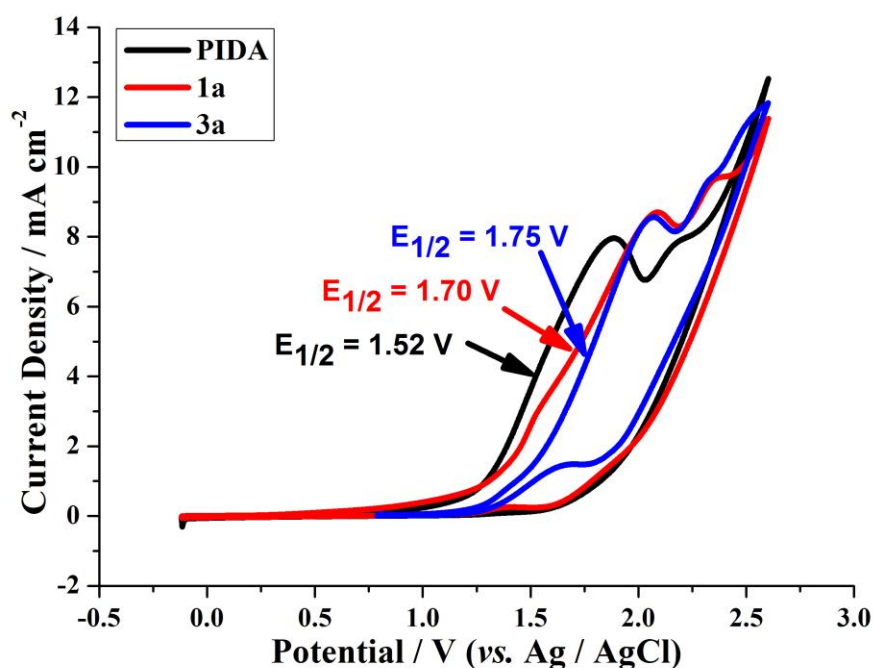

Furthermore, we probed the mechanism of photochemical oxidative by means of cyclic voltammetric experiment: individual PIDA, **1a**, **3a**. The measurements were executed at room temperature on a PGSTAT128N Autolab workstation (Netherlands) in a three-electrode system. The reference electrode was an Ag/AgCl electrode (saturated KCl solution). A carbon rod was employed as the counter electrode for measurement. A modified glassy-carbon electrode with a diameter of 5 mm was used as the working electrode. Briefly, 2.0 mg of determinand was firstly dispersed in Nafion/ethanol (0.4 mL, 0.25% Nafion) by sonication for 1 h to achieve a well-dispersed ink. Then, 8  $\mu$ L of the uniform suspension was pipetted onto the glassy-carbon electrode and dried in open air, which makes the determinand loading is 0.2 mg cm<sup>-2</sup> for all samples.

The potentials vs Ag/AgCl were converted to the reversible hydrogen electrode (RHE) using the Nernst equation:

$$E(\text{vs RHE}) = E(\text{vs AgCl/Ag}) + E_{\text{AgCl/Ag}}^0 + 0.0591 \cdot \text{pH} \quad (1)$$

(where  $E_{\text{AgCl/Ag}}^0$  is 0.199 V at 25 °C)

The potentials vs SCE were converted to the reversible hydrogen electrode (RHE) using the Nernst equation:

$$E(\text{vs RHE}) = E(\text{vs SCE}) + E_{\text{SCE}}^0 + 0.0591 \cdot \text{pH} \quad (2)$$

(where  $E_{\text{SCE}}^0$  is 0.244 V at 25 °C)

In combination with the equation 1 and 2, the redox potentials of PIDA, **1a** and **3a** can be calculated as  $E_{\text{PIDA}}(\text{vs SCE}) = 1.475$  V,  $E_{\mathbf{1a}}(\text{vs SCE}) = 1.655$  V,  $E_{\mathbf{3a}}(\text{vs SCE}) = 1.705$  V. As the redox potentials of Ru(bpy)<sub>3</sub>Cl<sub>2</sub>•6H<sub>2</sub>O are well known in literature ( $E_{1/2}(\text{Ru}^{\text{III}}/\text{Ru}^{\text{II}}) = -0.81$  V vs. SCE,  $E_{1/2}(\text{Ru}^{\text{III}}/\text{Ru}^{\text{II}}) = +1.29$  V vs. SCE), in combination with the redox potentials of PIDA, **1a** and **3a**, it could be support the SET events in the proposed mechanism.

#### 4. Emission quenching experiment

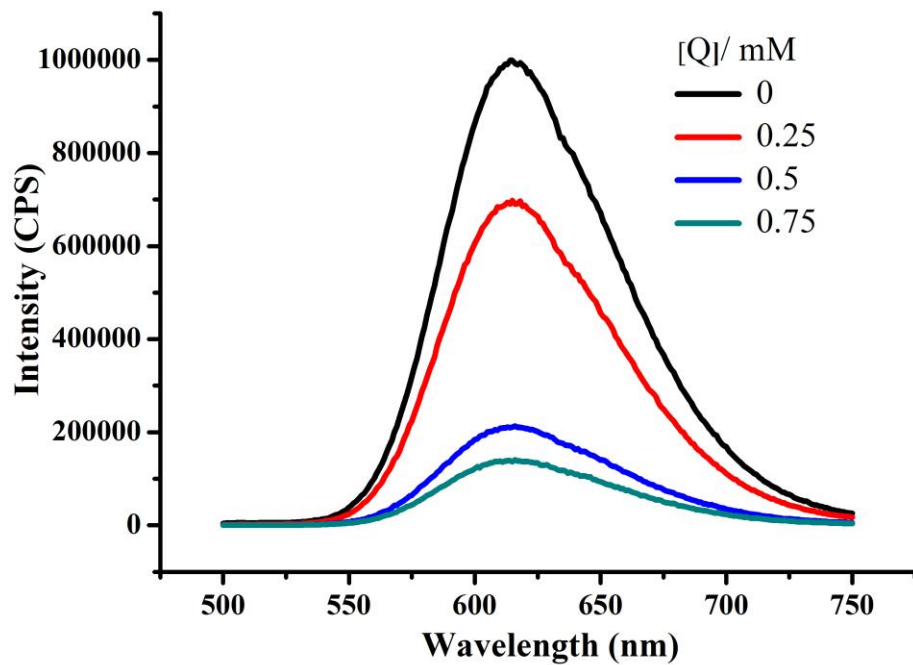

Emission intensities were recorded using a HORIBA Jobin Yvon Fluorolog3 Spectrofluorimeter. Initially, emission spectra of 10  $\mu\text{M}$  Ru(bpy)<sub>3</sub>Cl<sub>2</sub>•6H<sub>2</sub>O in DMSO was collected. Then, appropriate amount of quencher PIDA was added with increasing concentration and subsequent emission spectrum were recorded.

## 5. NMR copies of compounds 3.

NMR copies of compound **3a**:

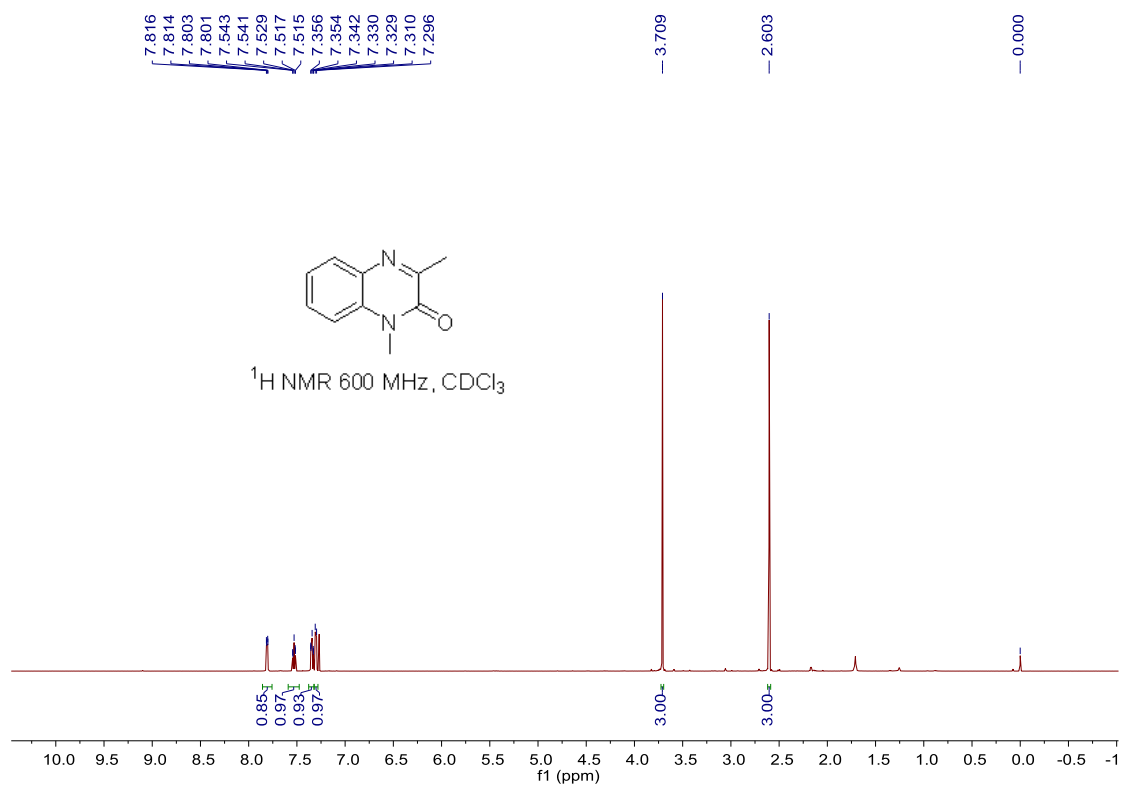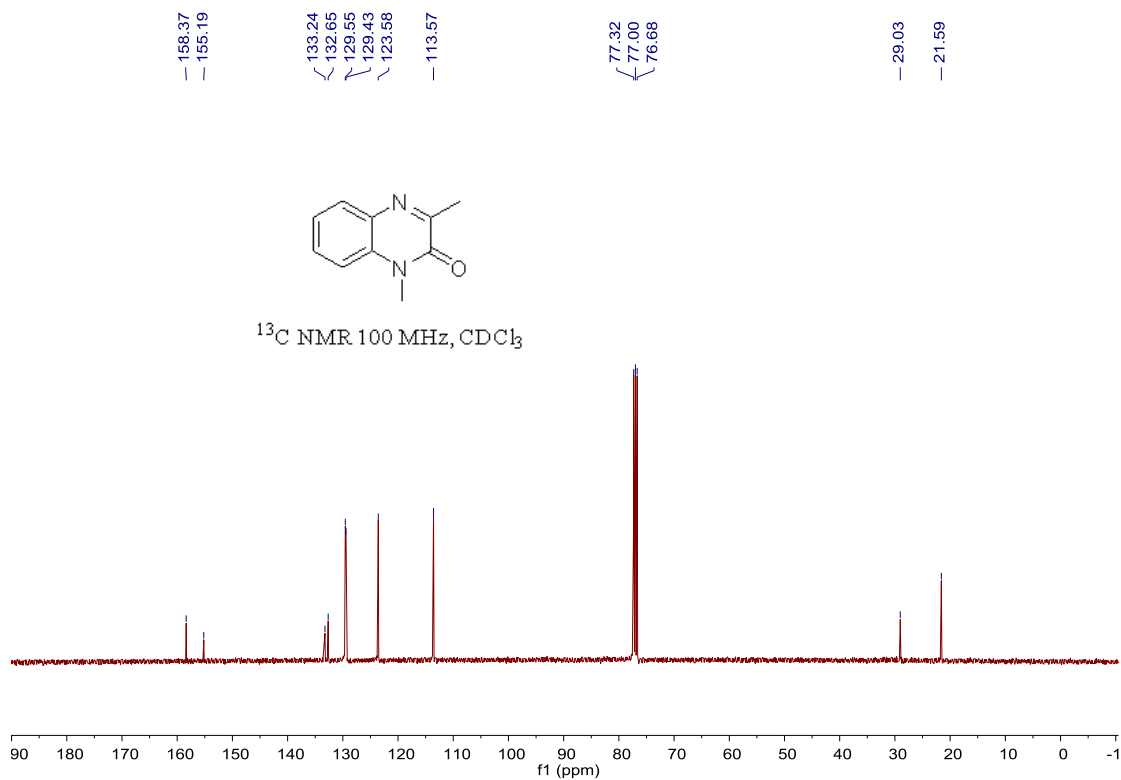

NMR copies of compound **3b**:

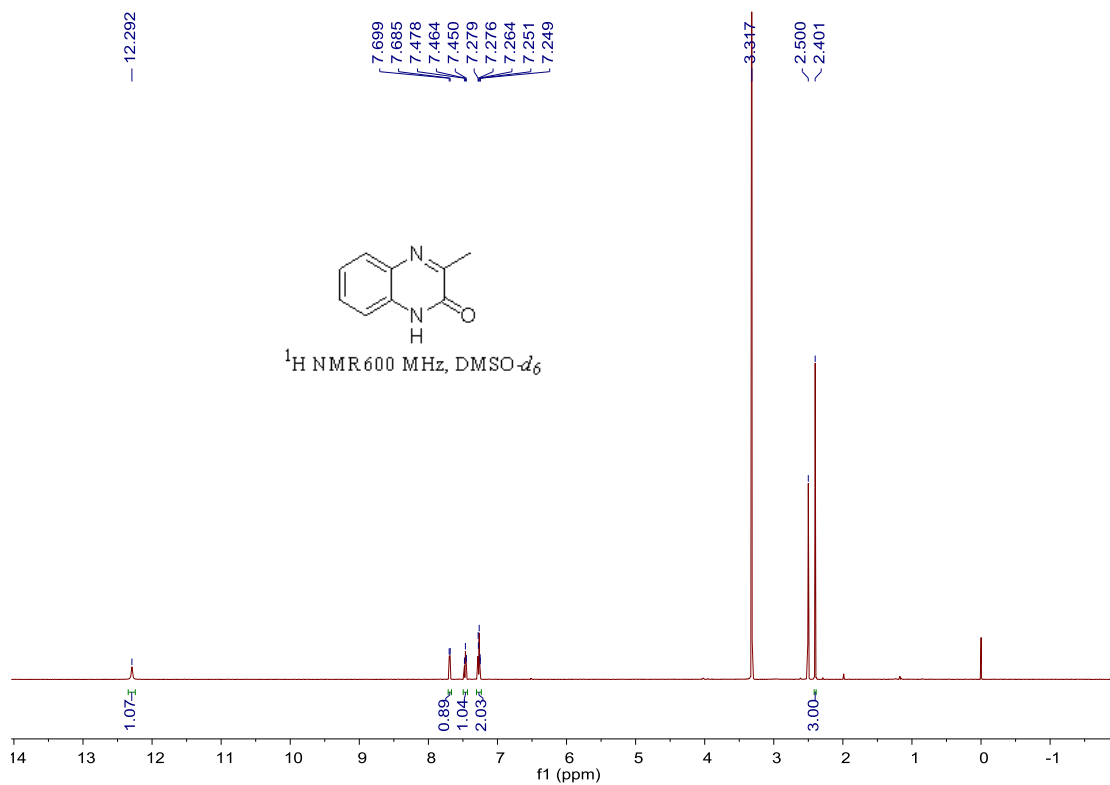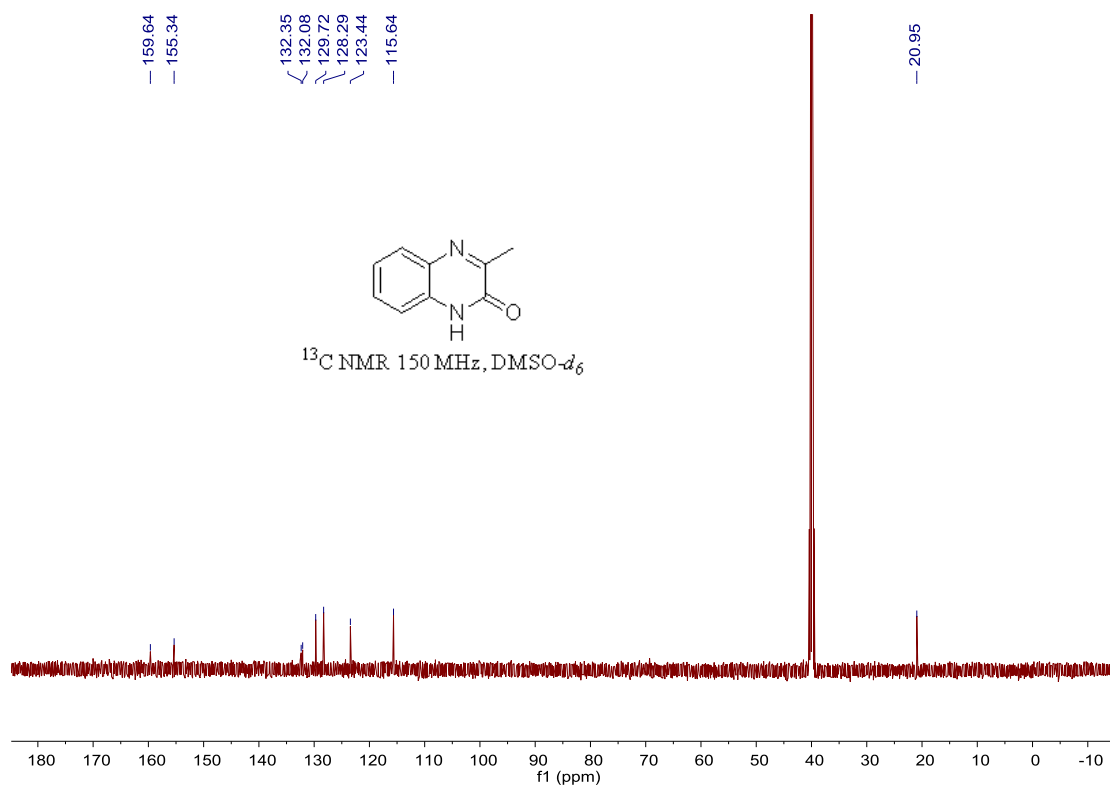



NMR copies of compound **3c**:

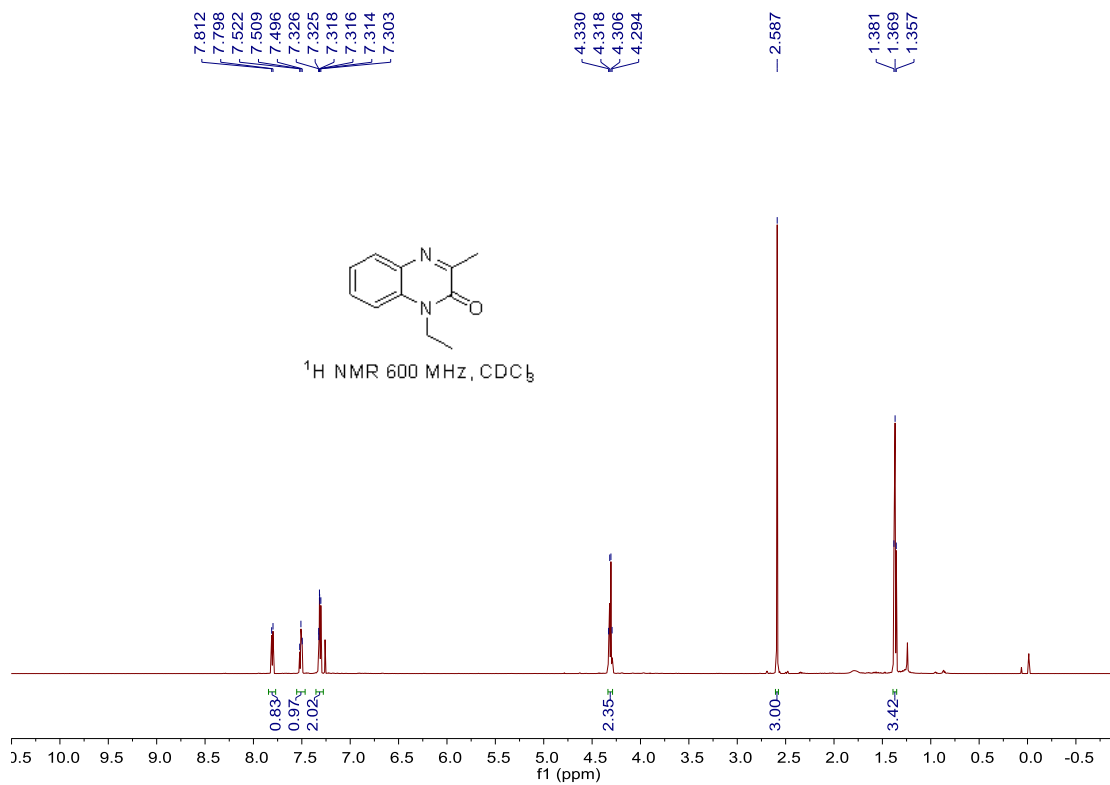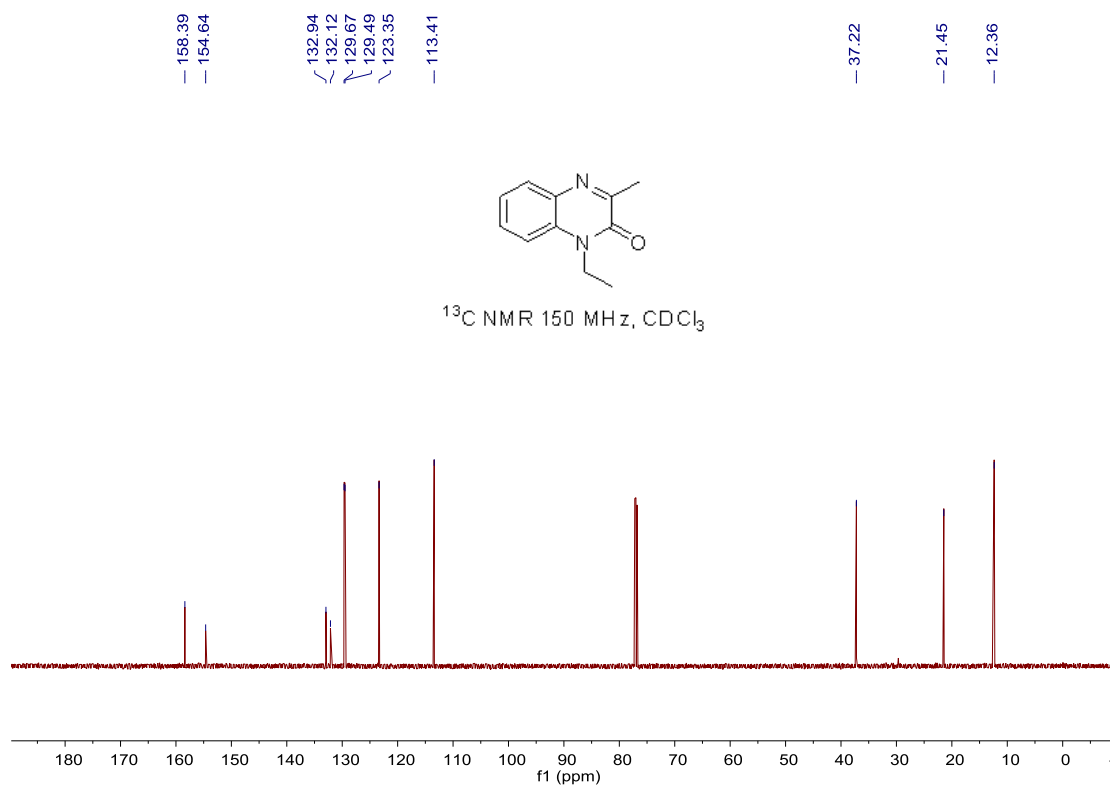

NMR copies of compound **3d**:

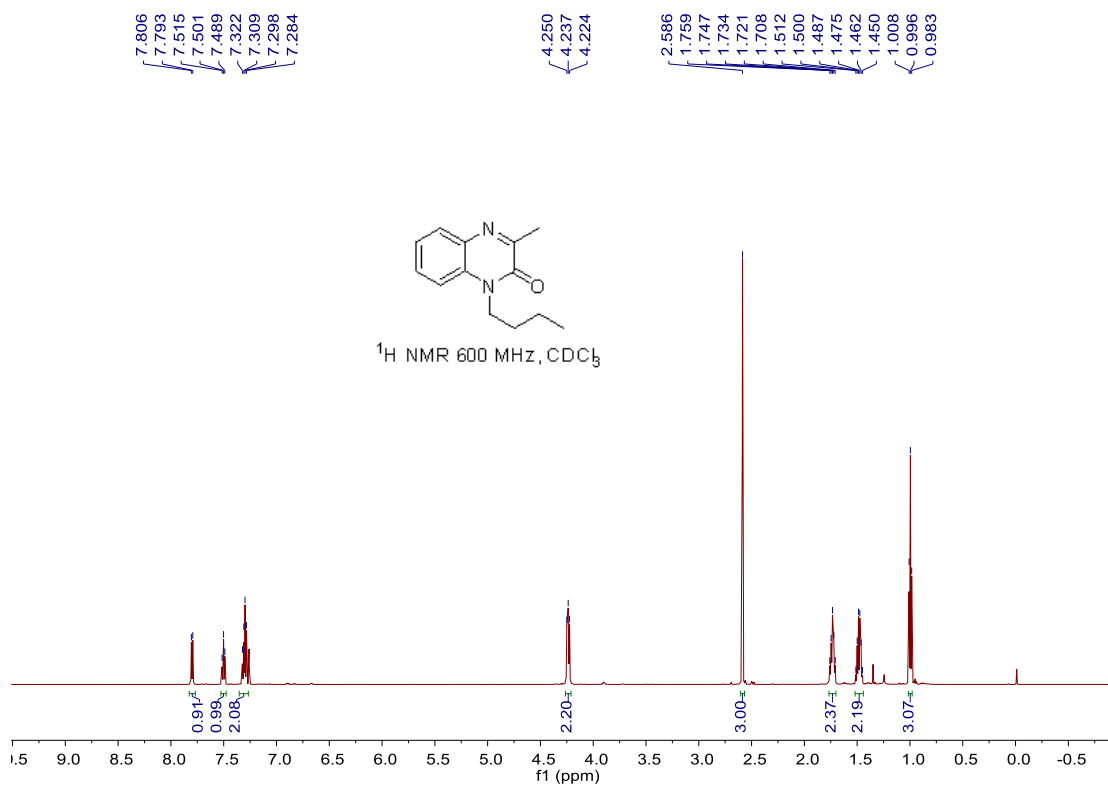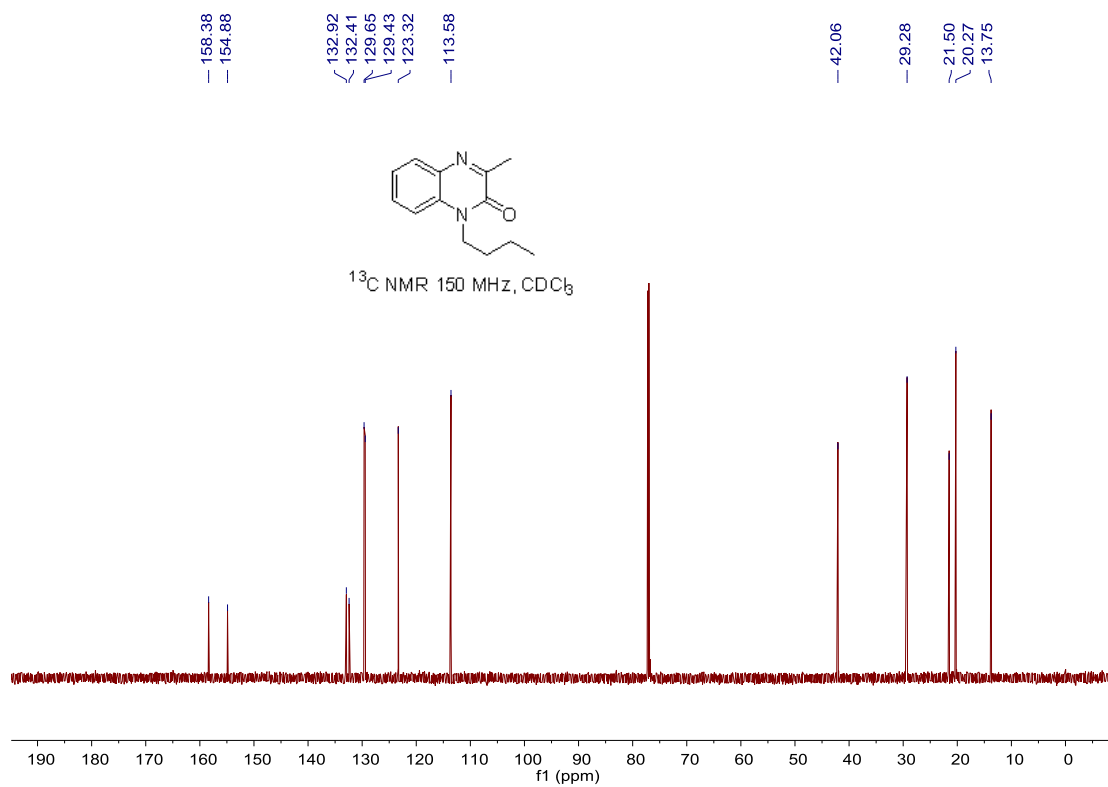

NMR copies of compound **3e**:

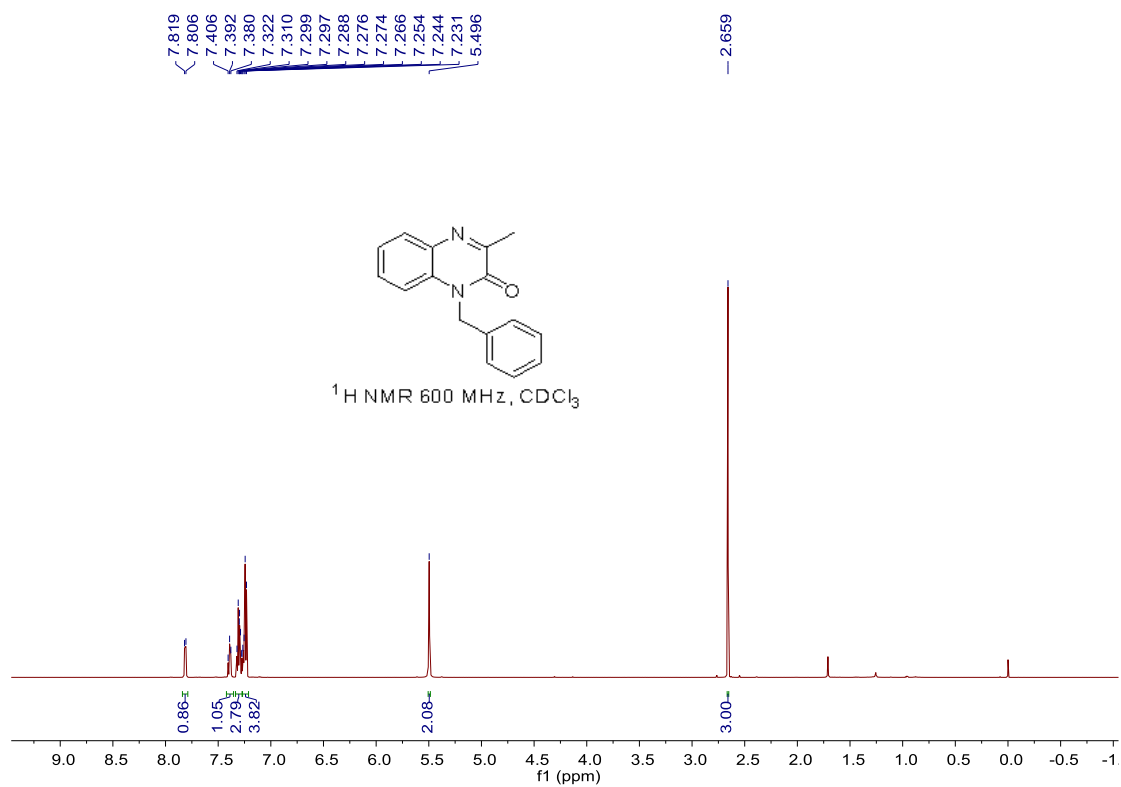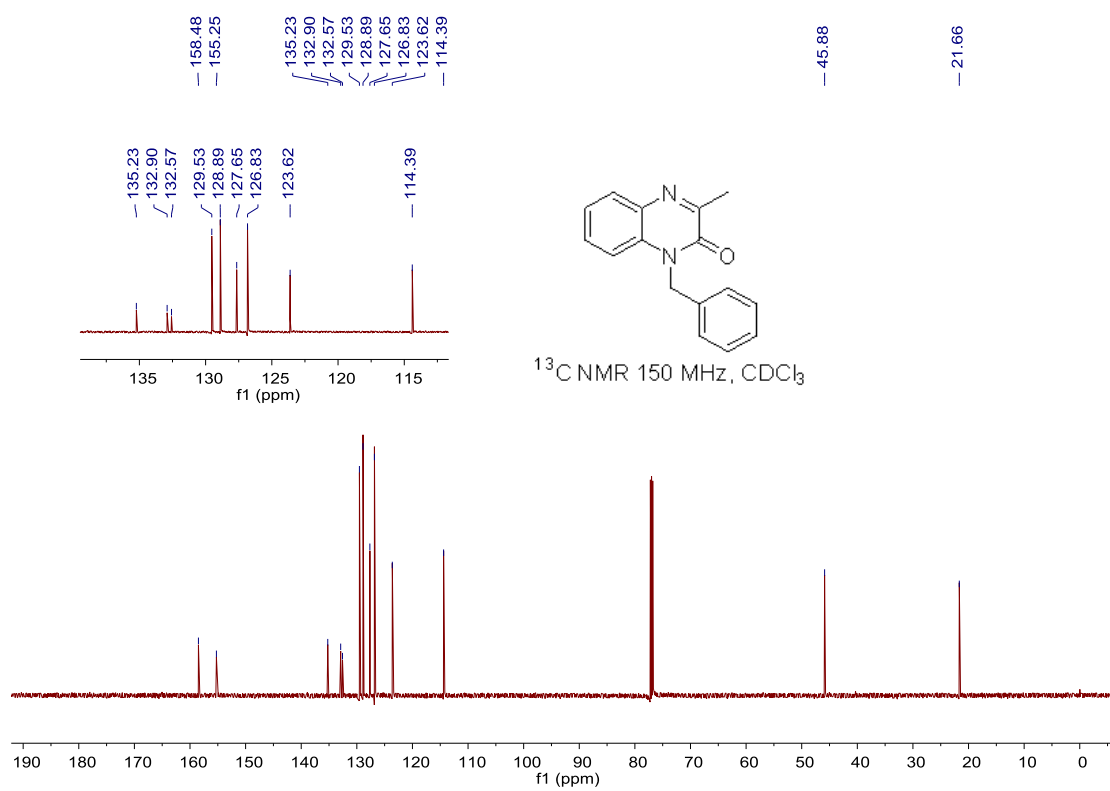

NMR copies of compound **3f**:

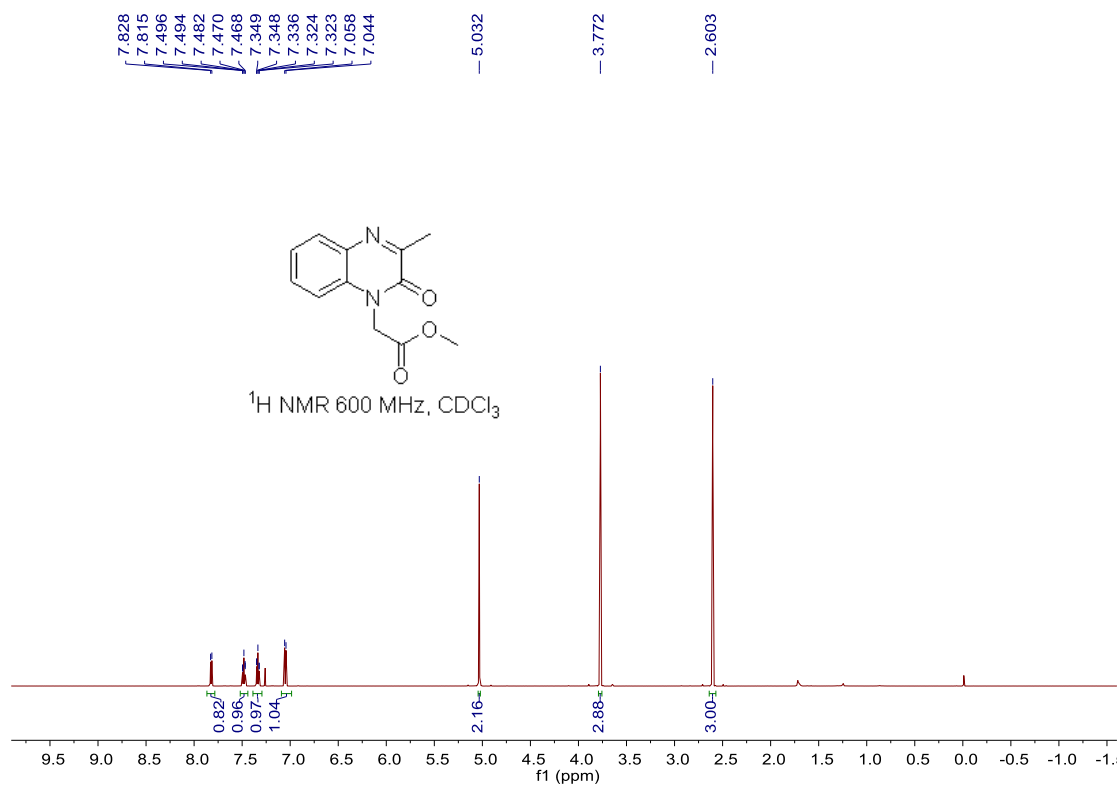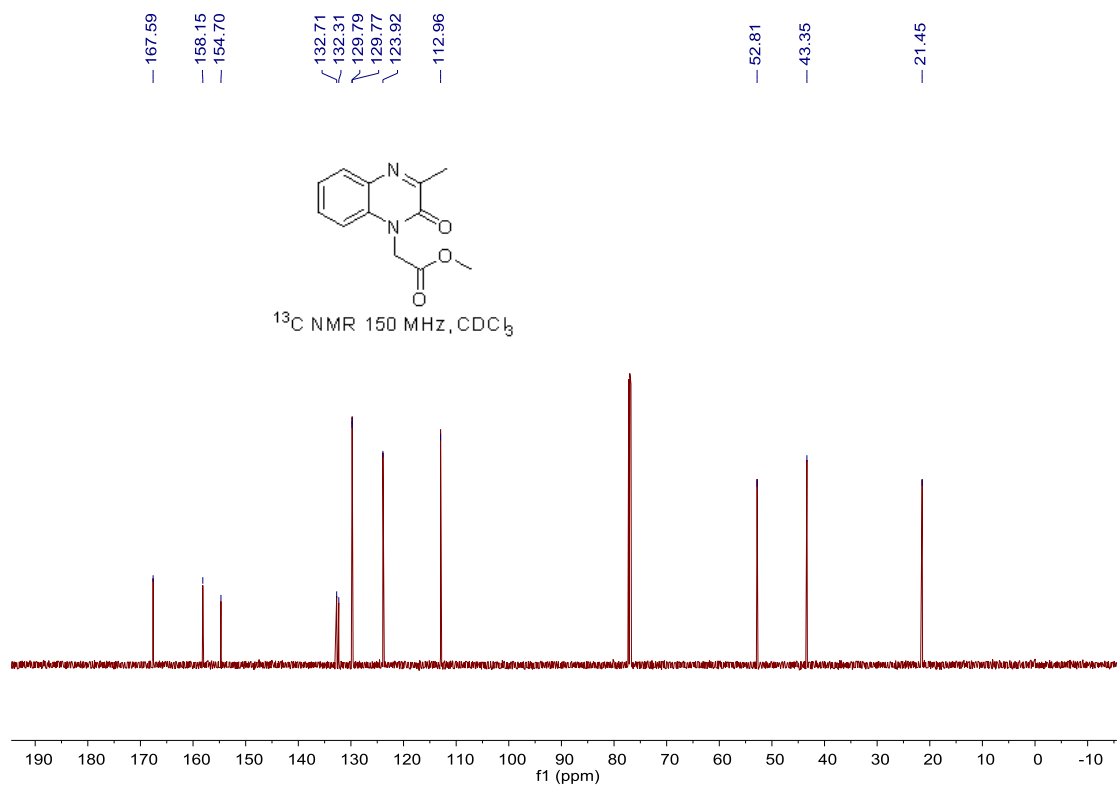

NMR copies of compound **3g**:

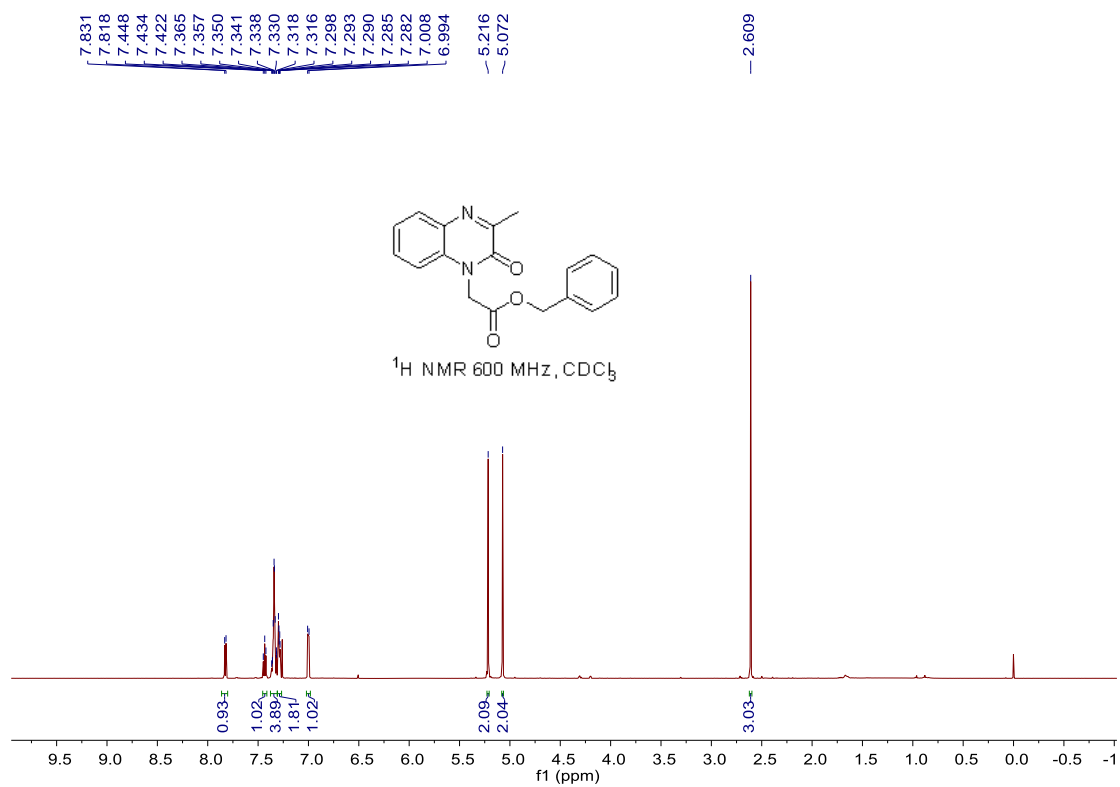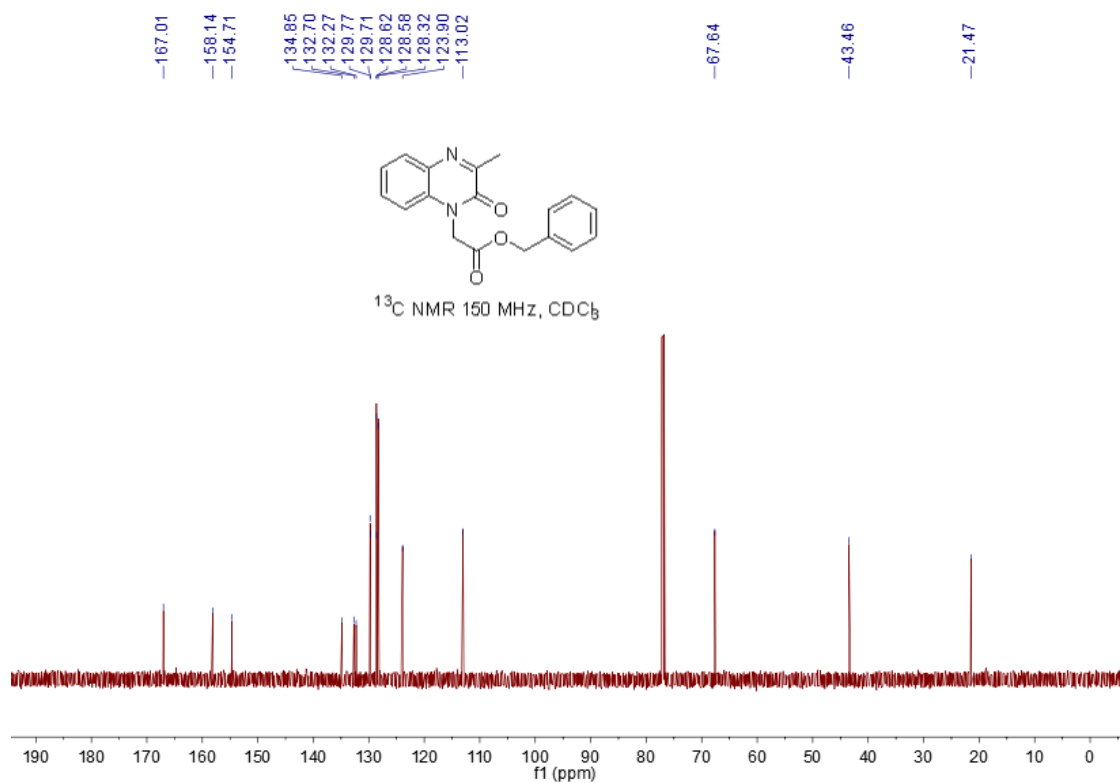

### NMR copies of compound **3h**:

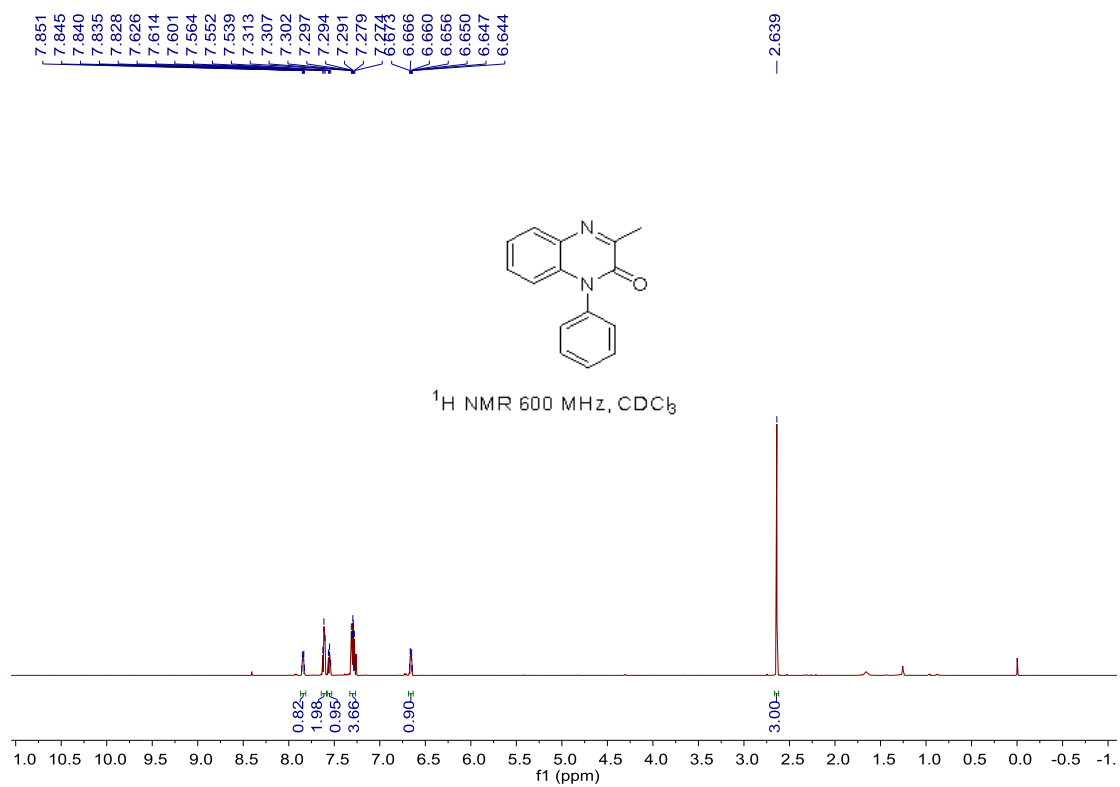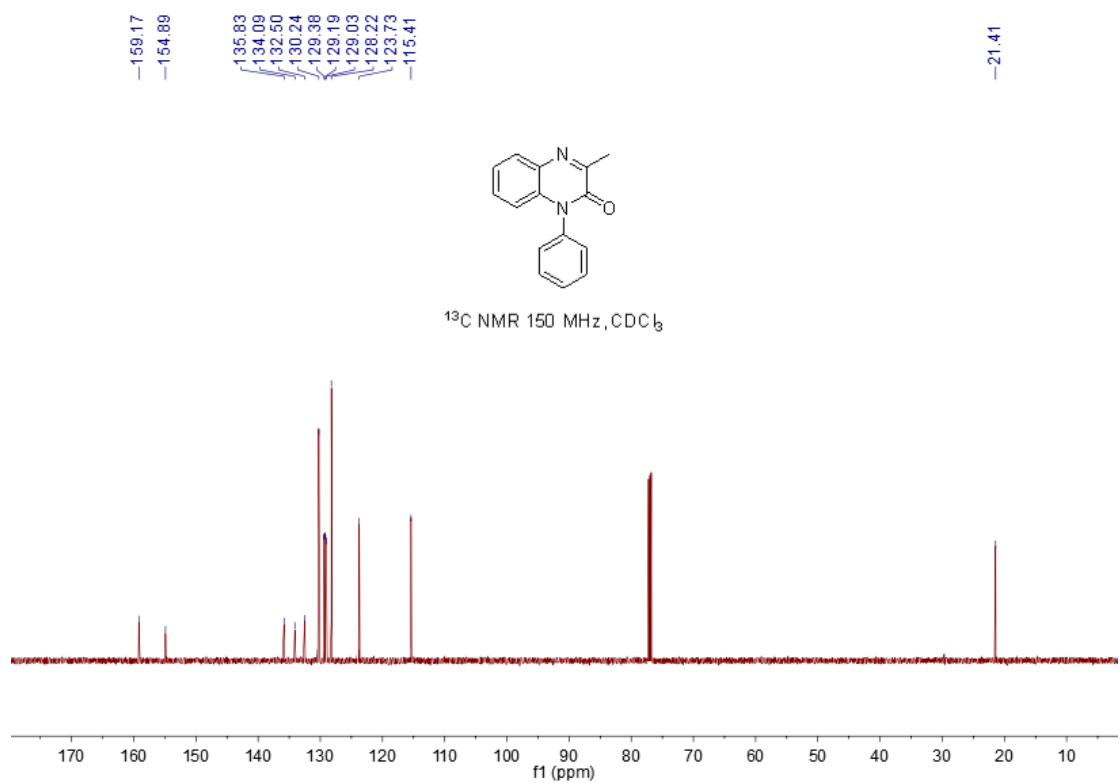

NMR copies of compound **3i**:

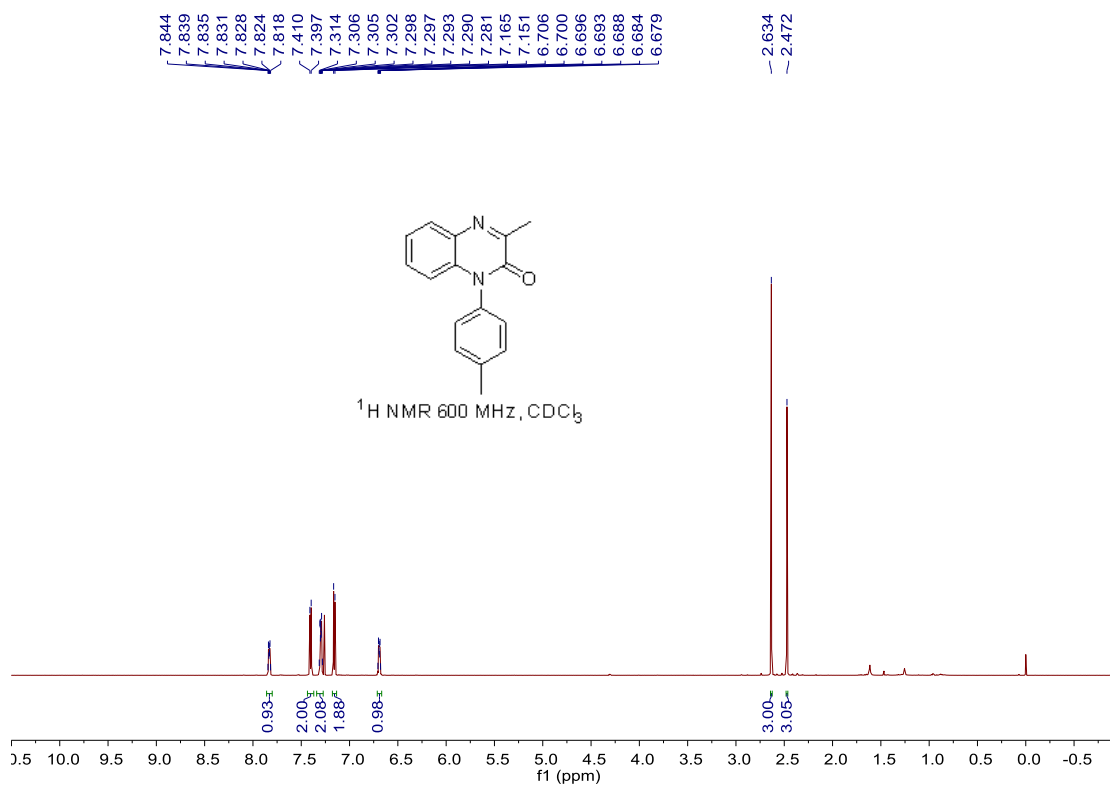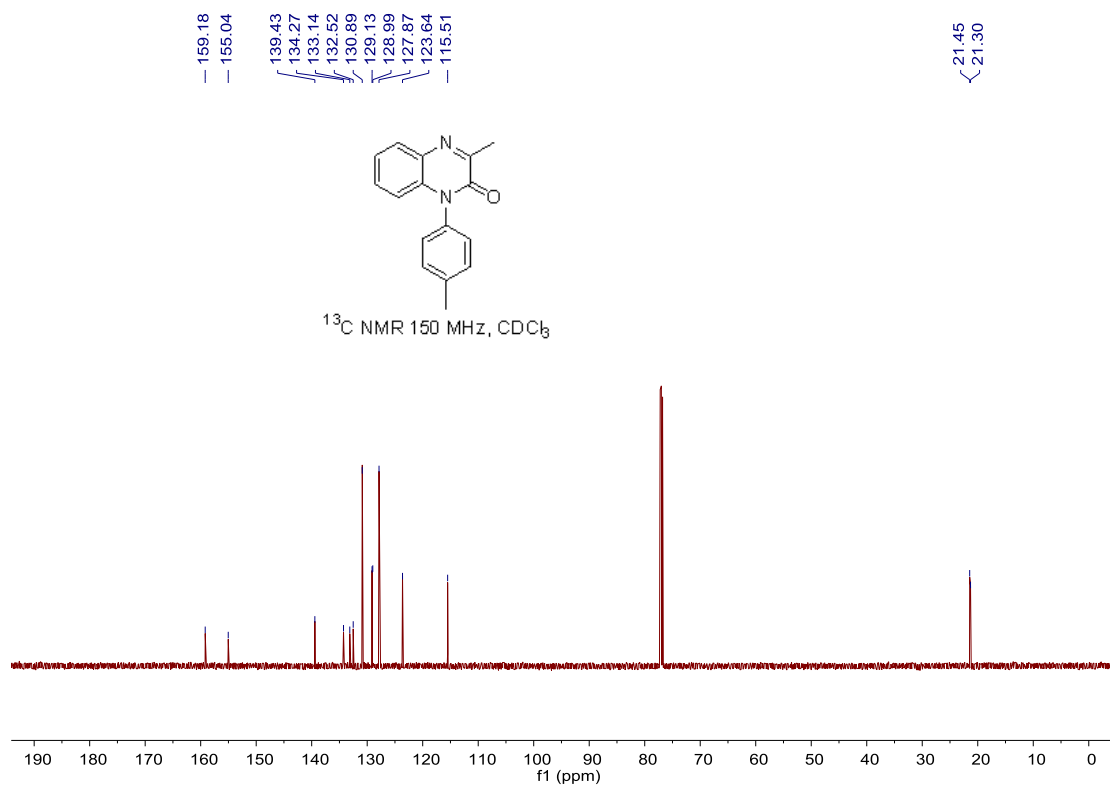

NMR copies of compound **3j**:

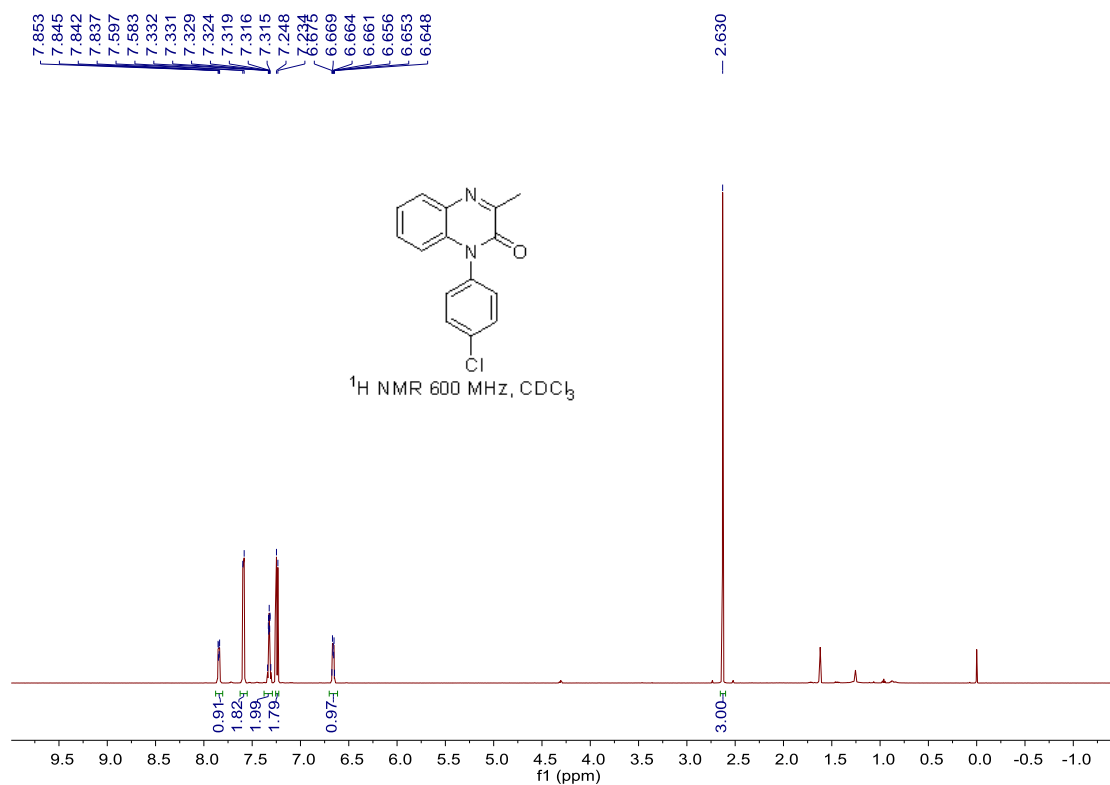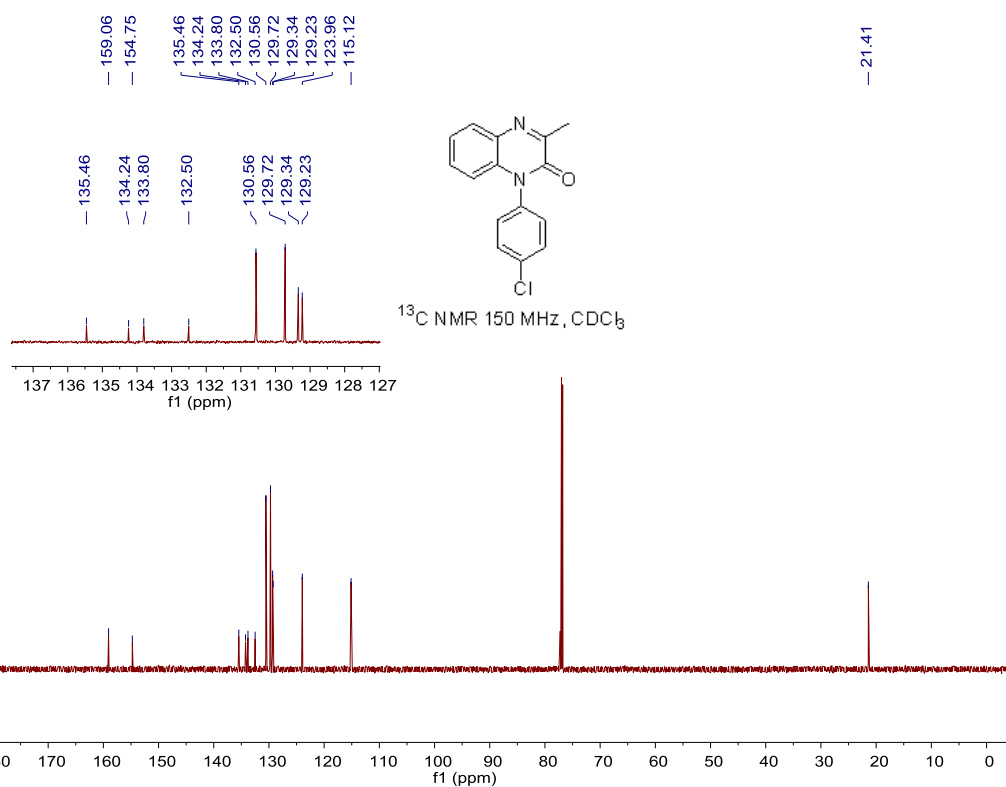



NMR copies of compound **3k**:

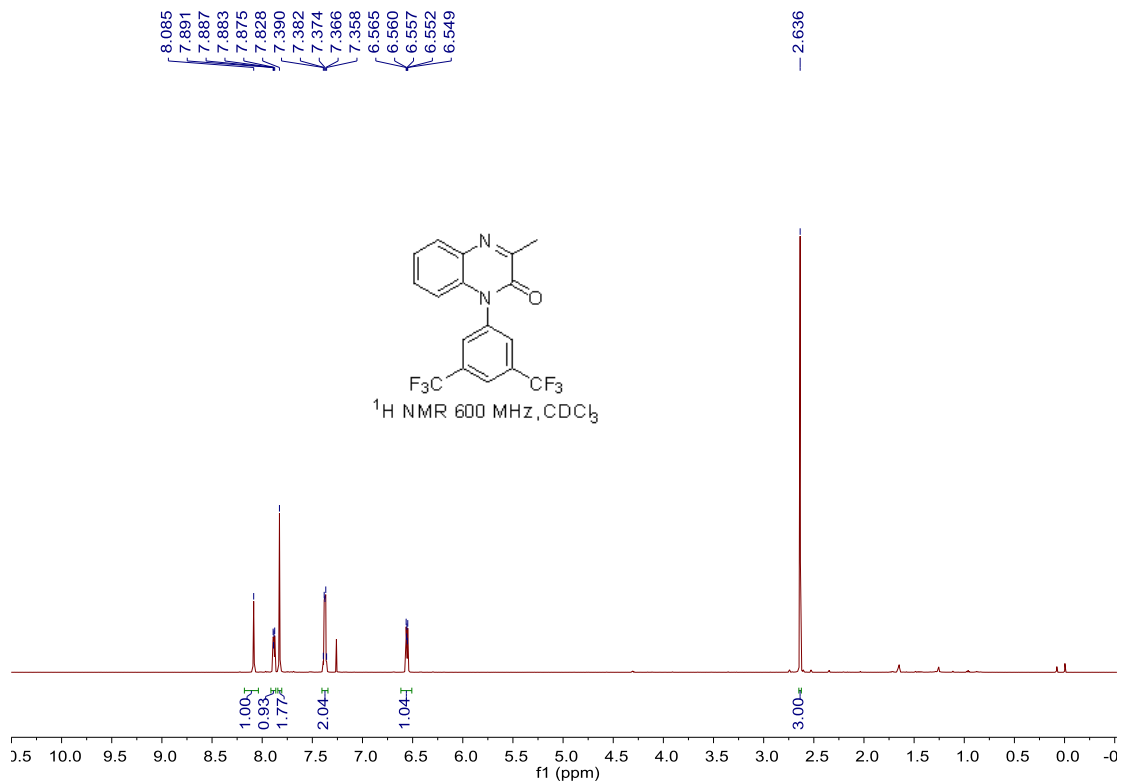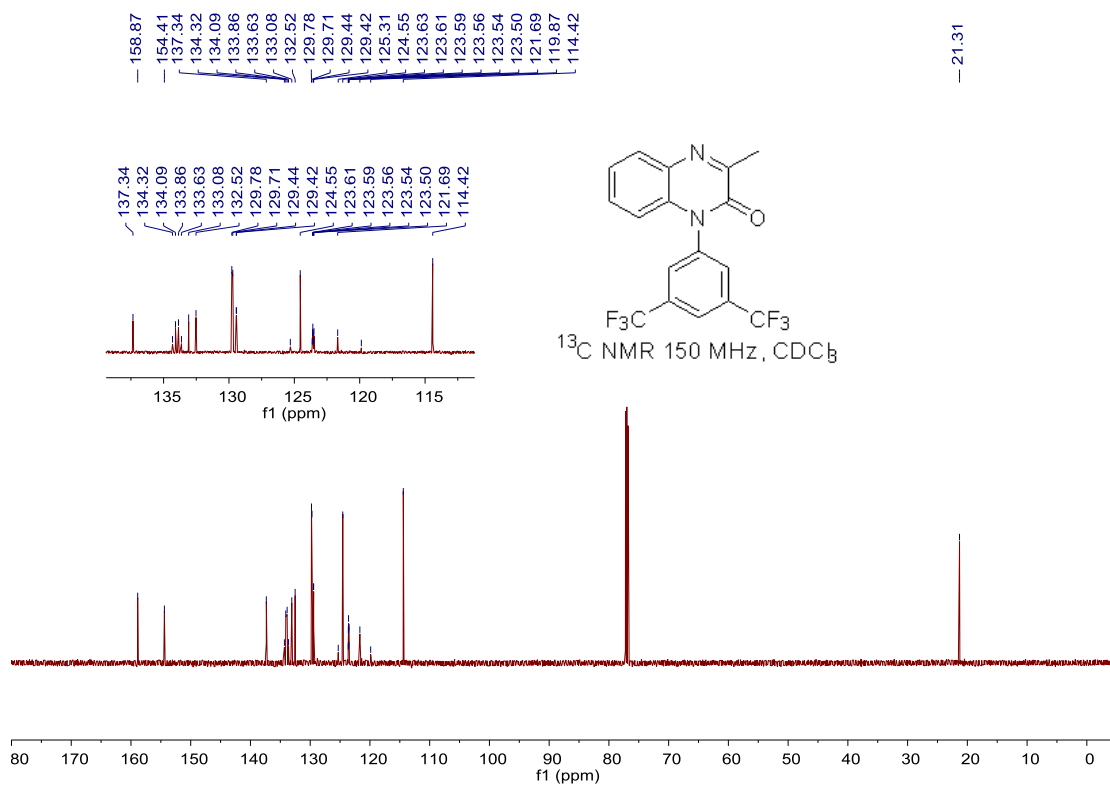

-63.25

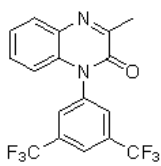

<sup>19</sup>F NMR 376 MHz, CDCl<sub>3</sub>

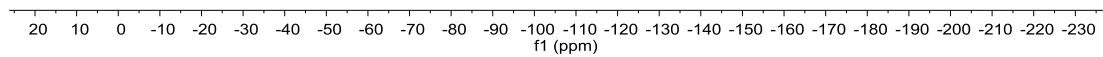

NMR copies of compound **31**:

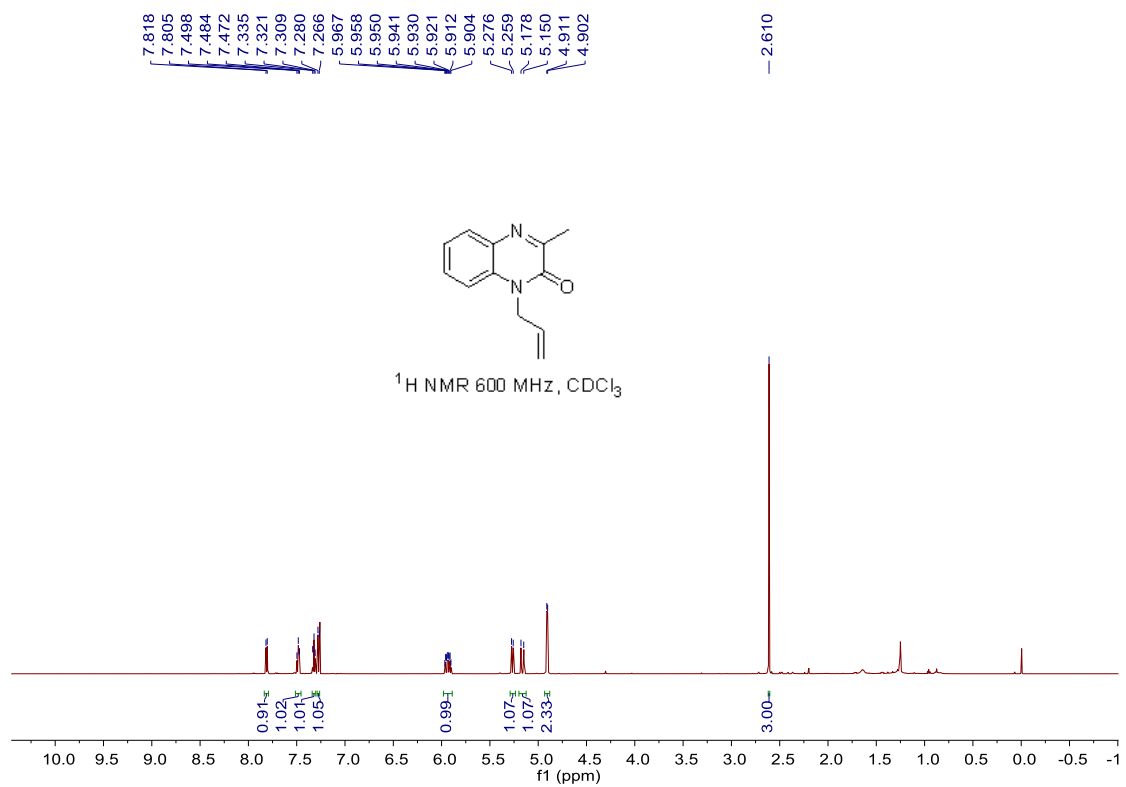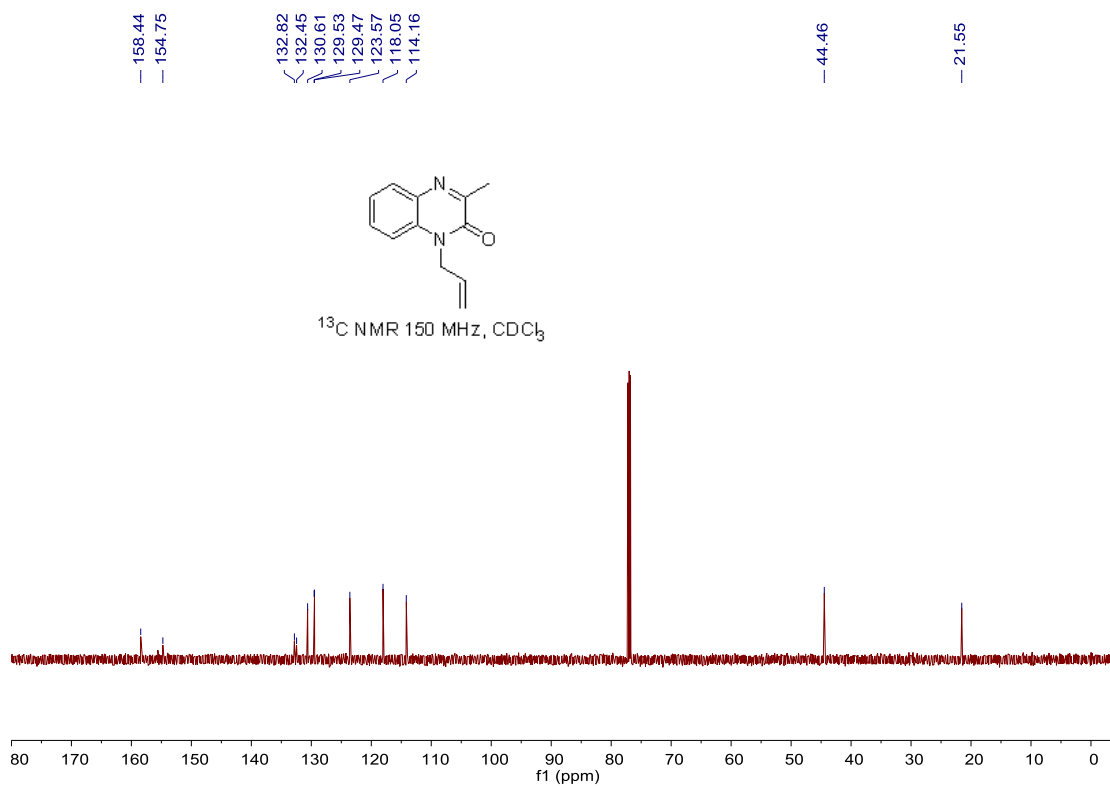

NMR copies of compound **3m**:

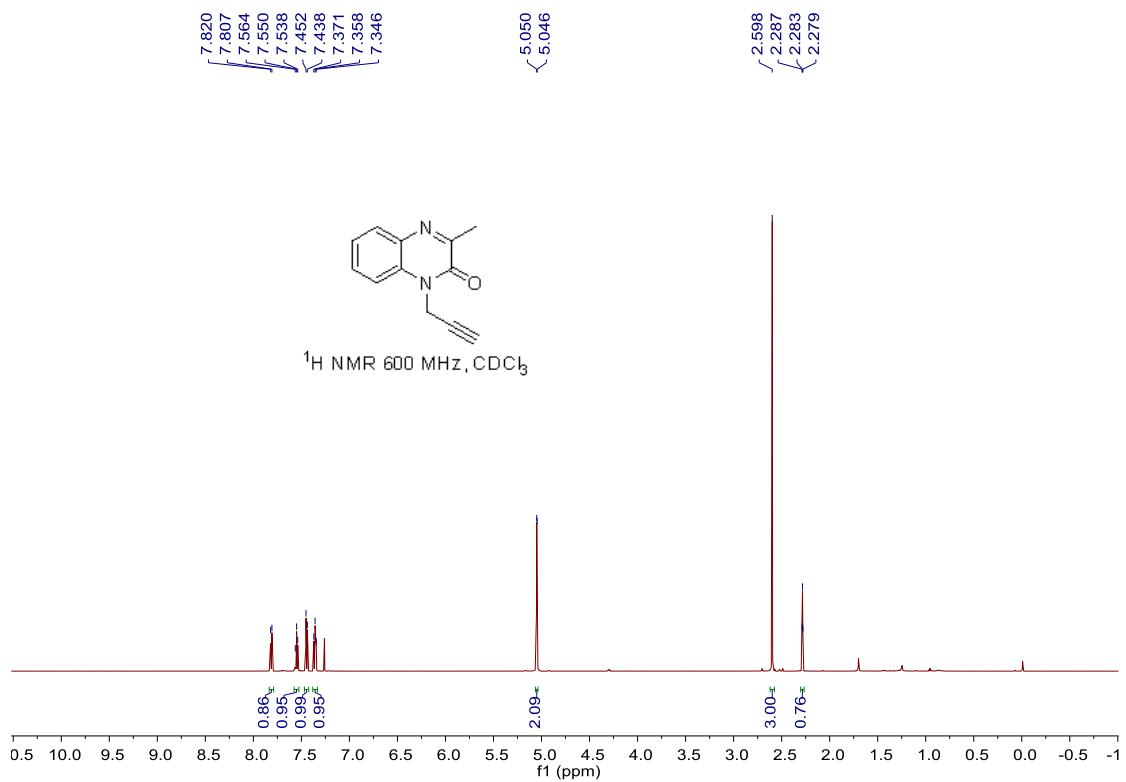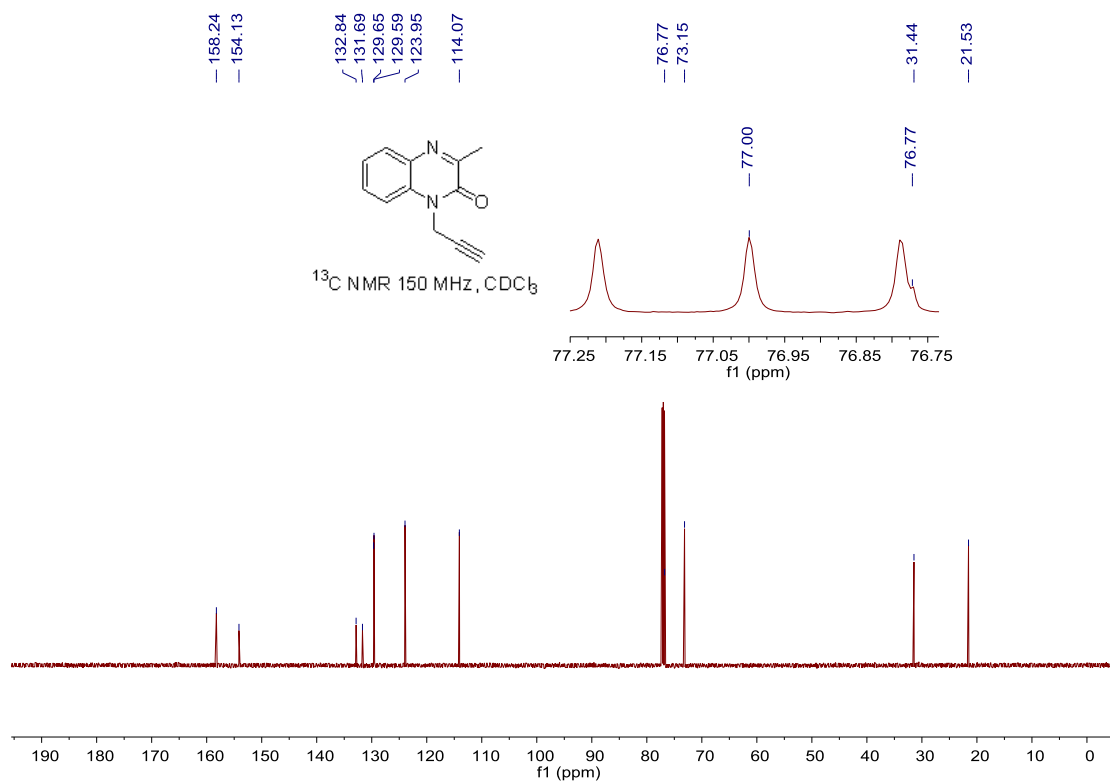

NMR copies of compound **3n**:

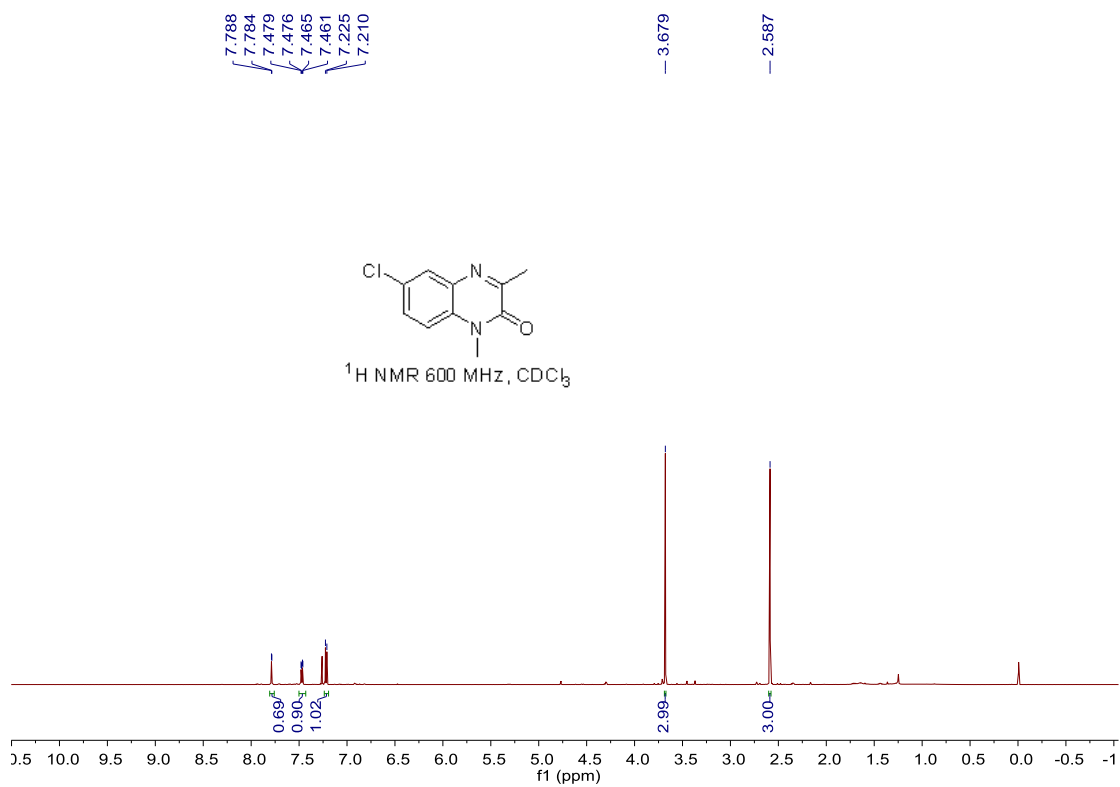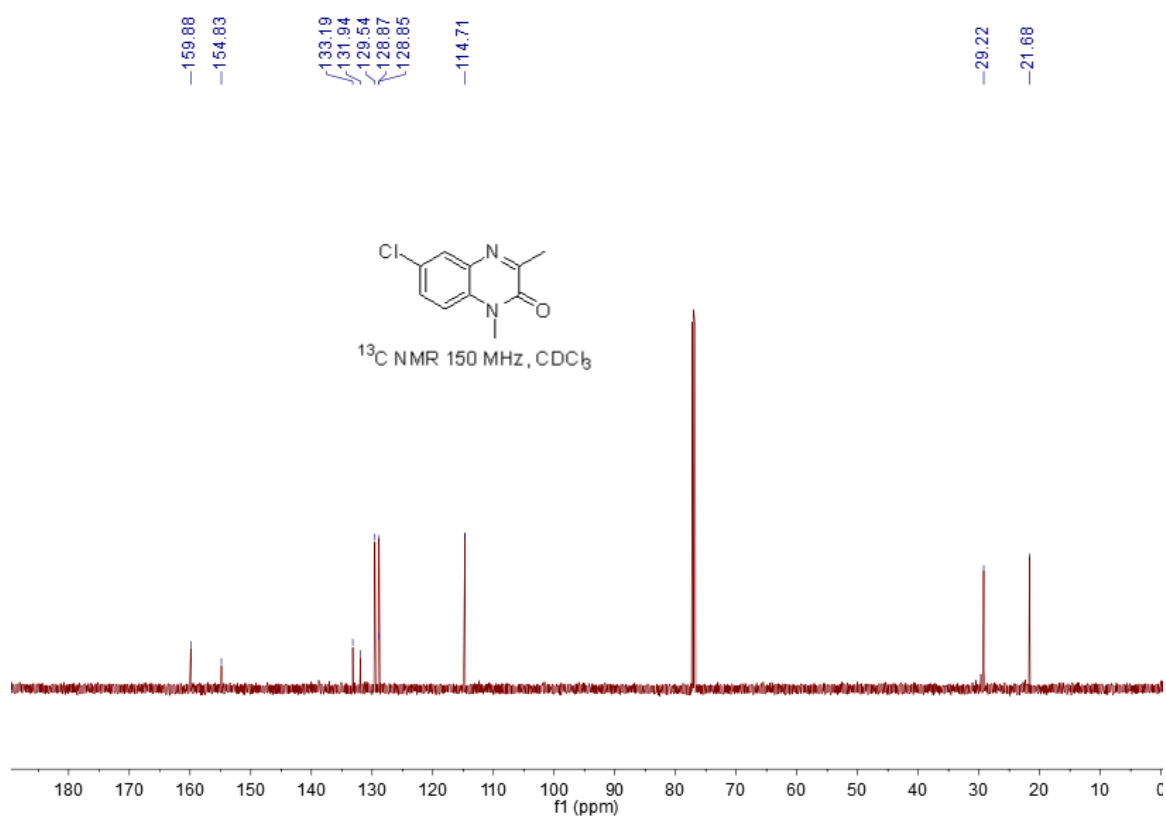

NMR copies of compound **3o**:

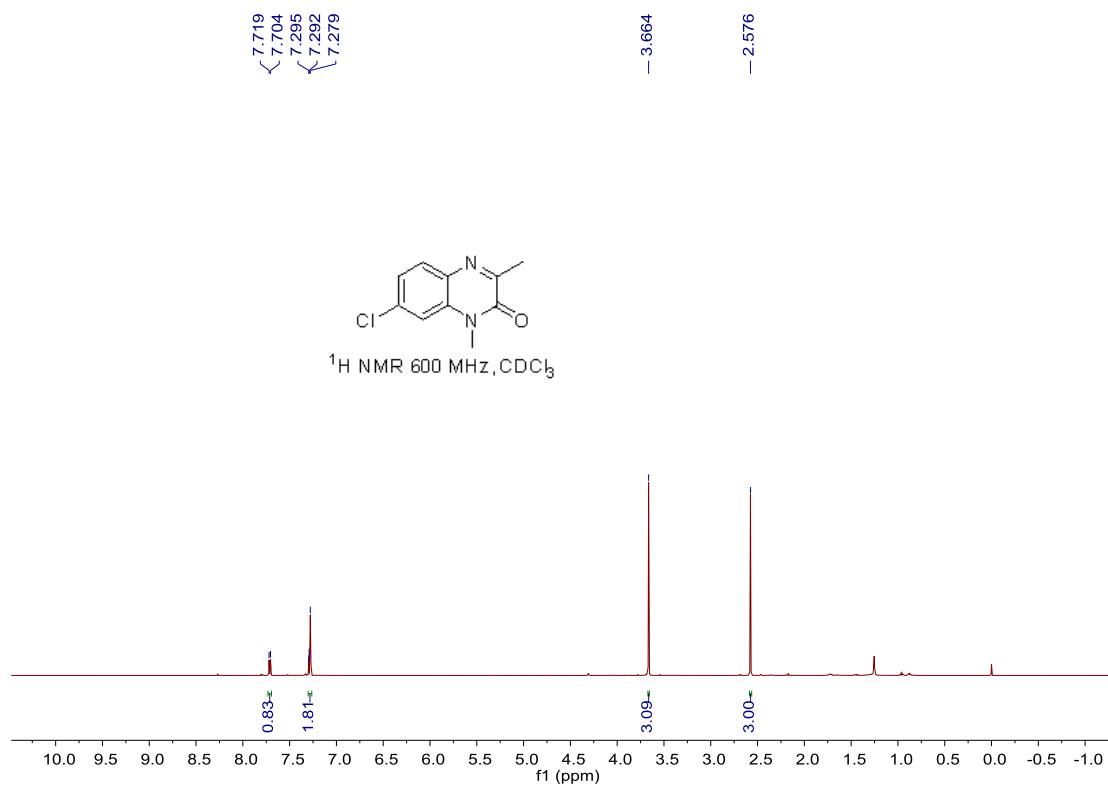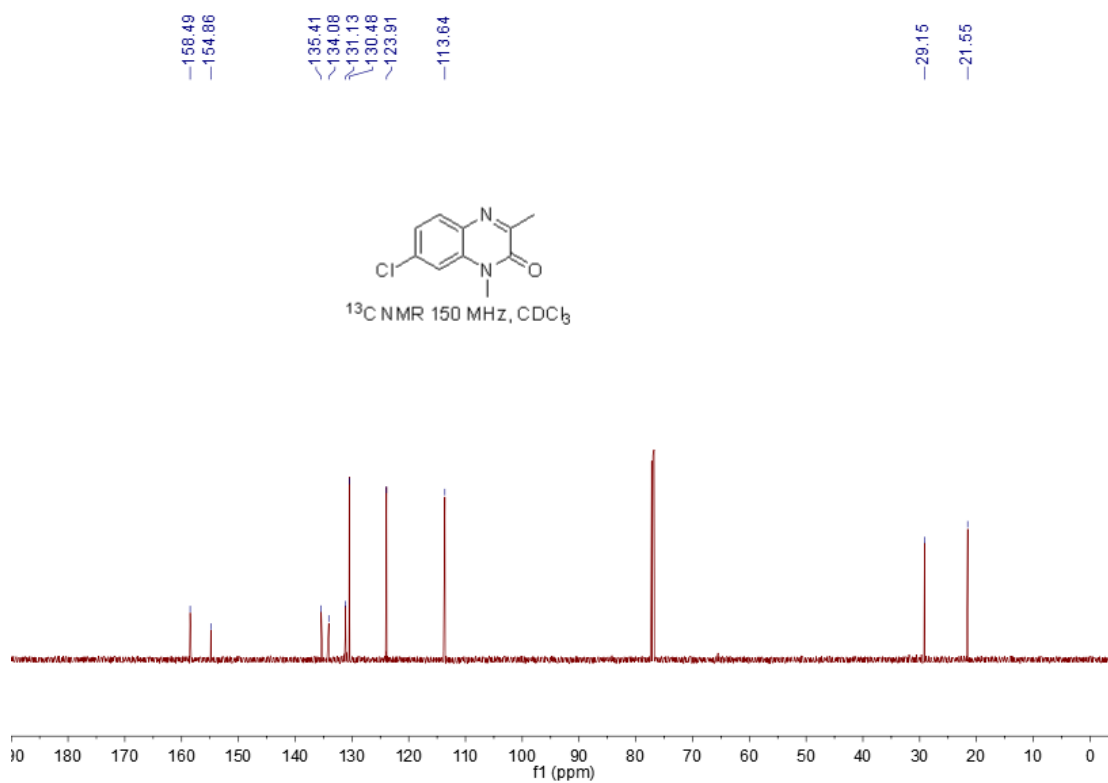

NMR copies of compound **3p**:

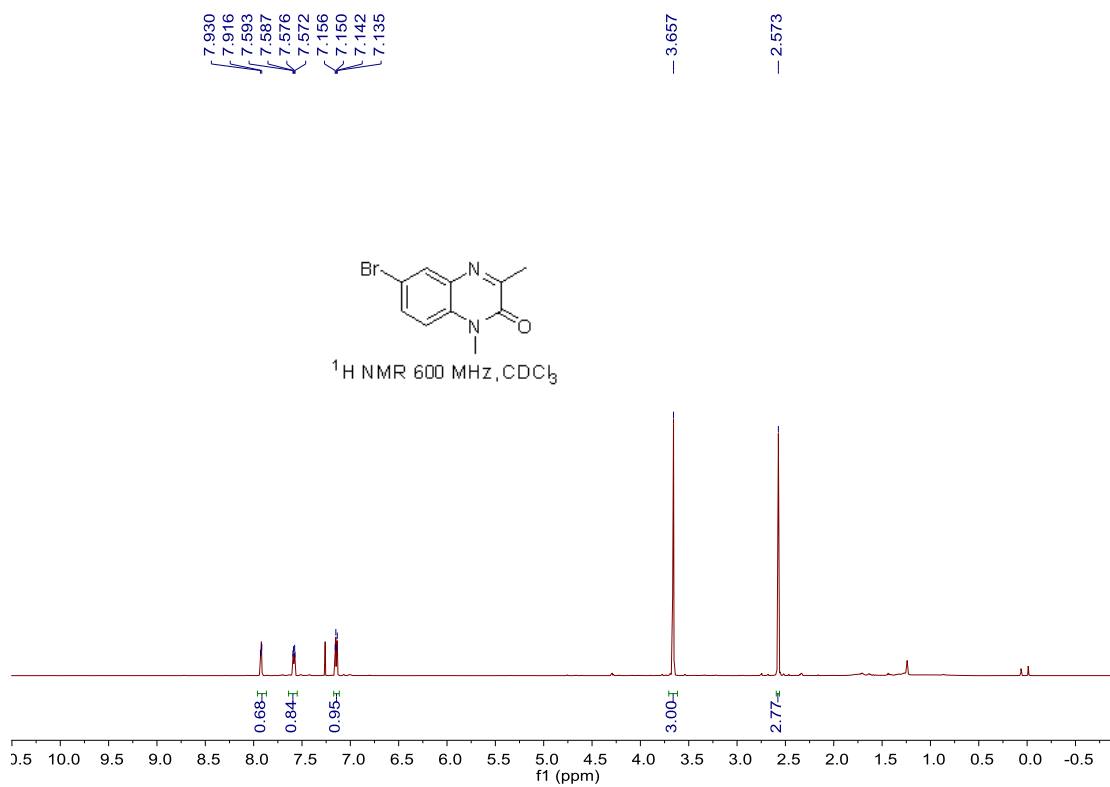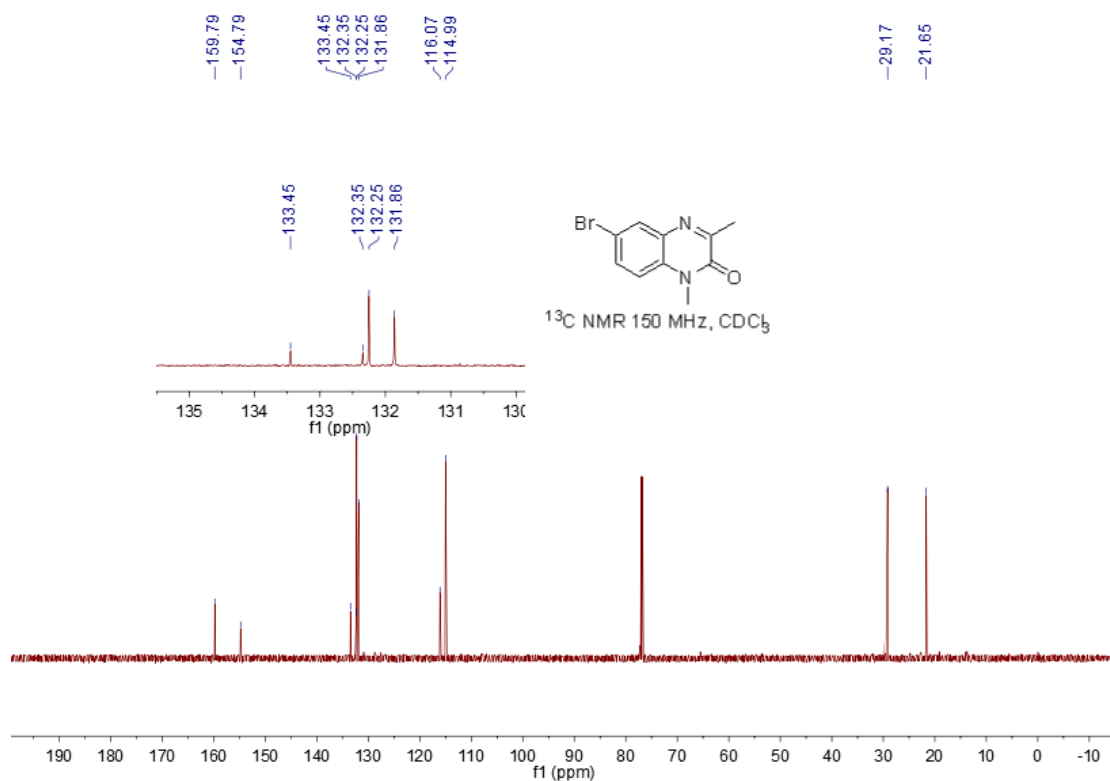

NMR copies of compound **3q**:

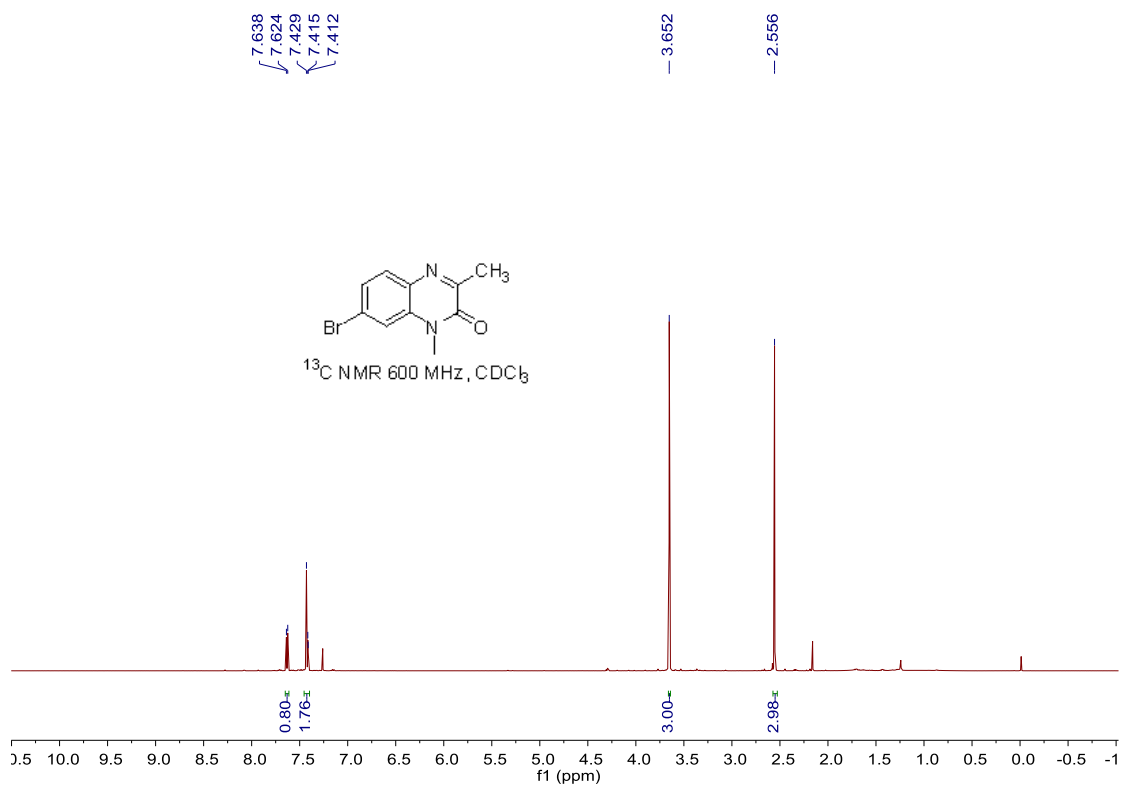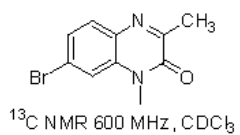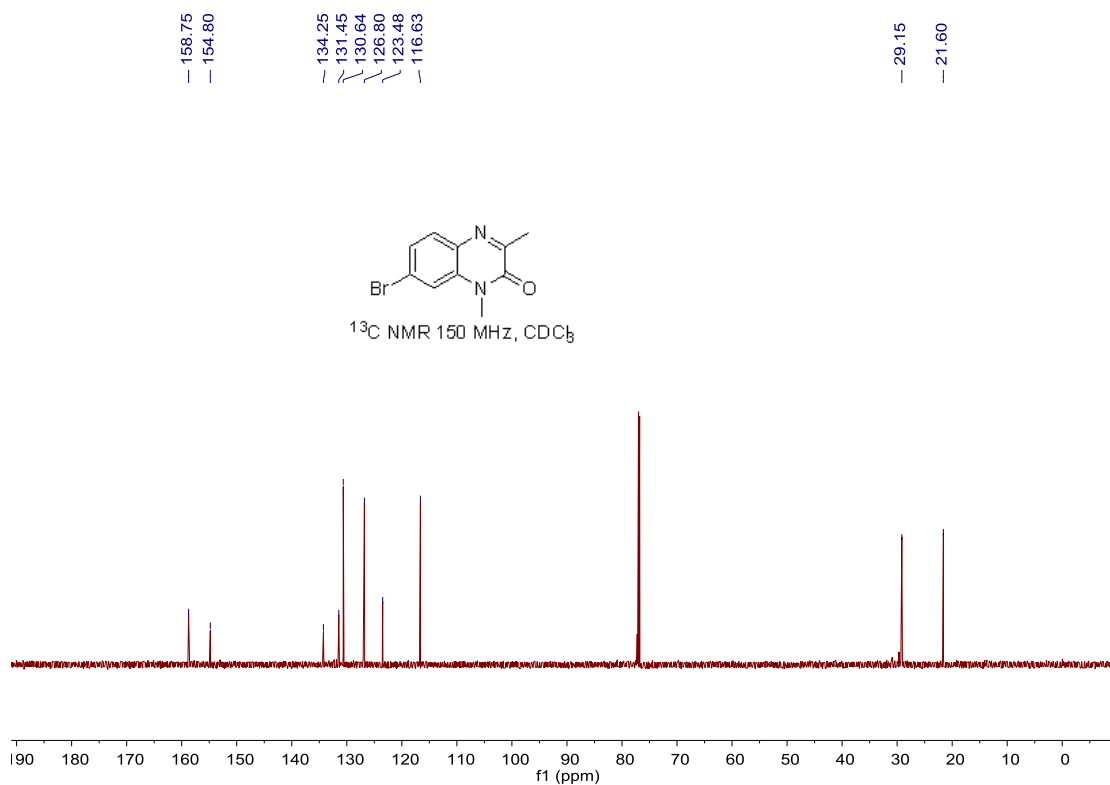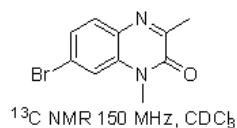



NMR copies of compound **3r**:

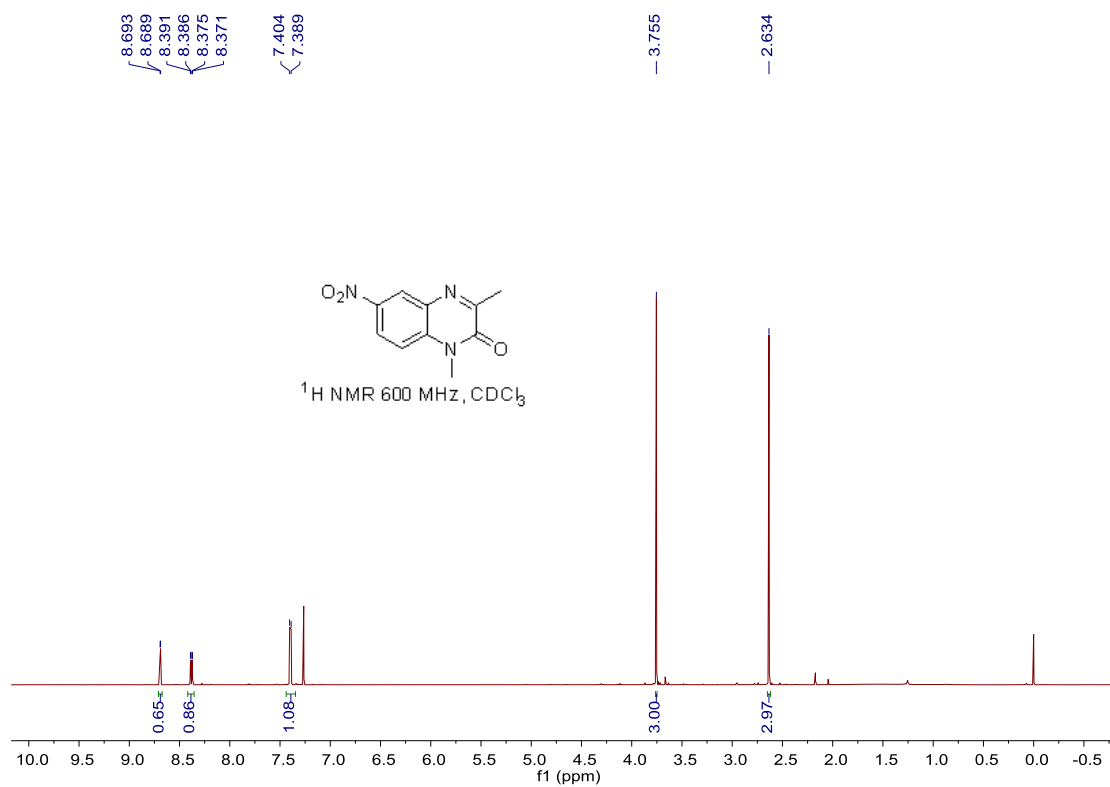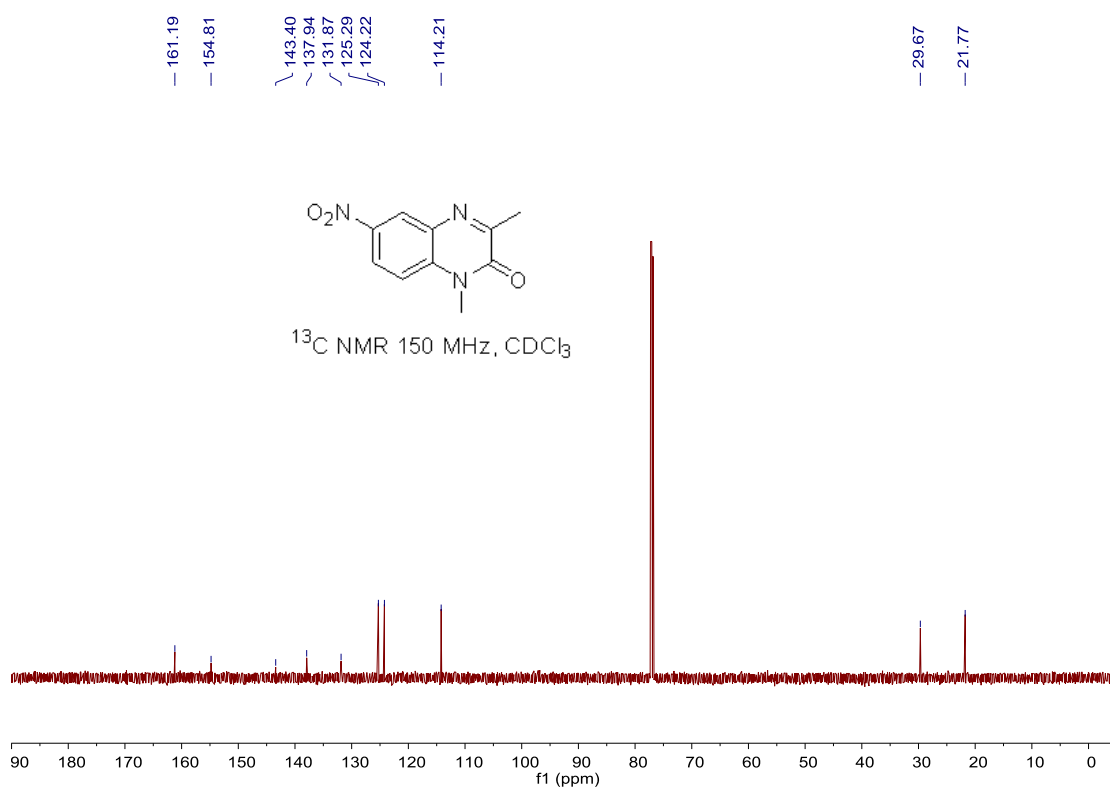

NMR copies of compound **3s**:

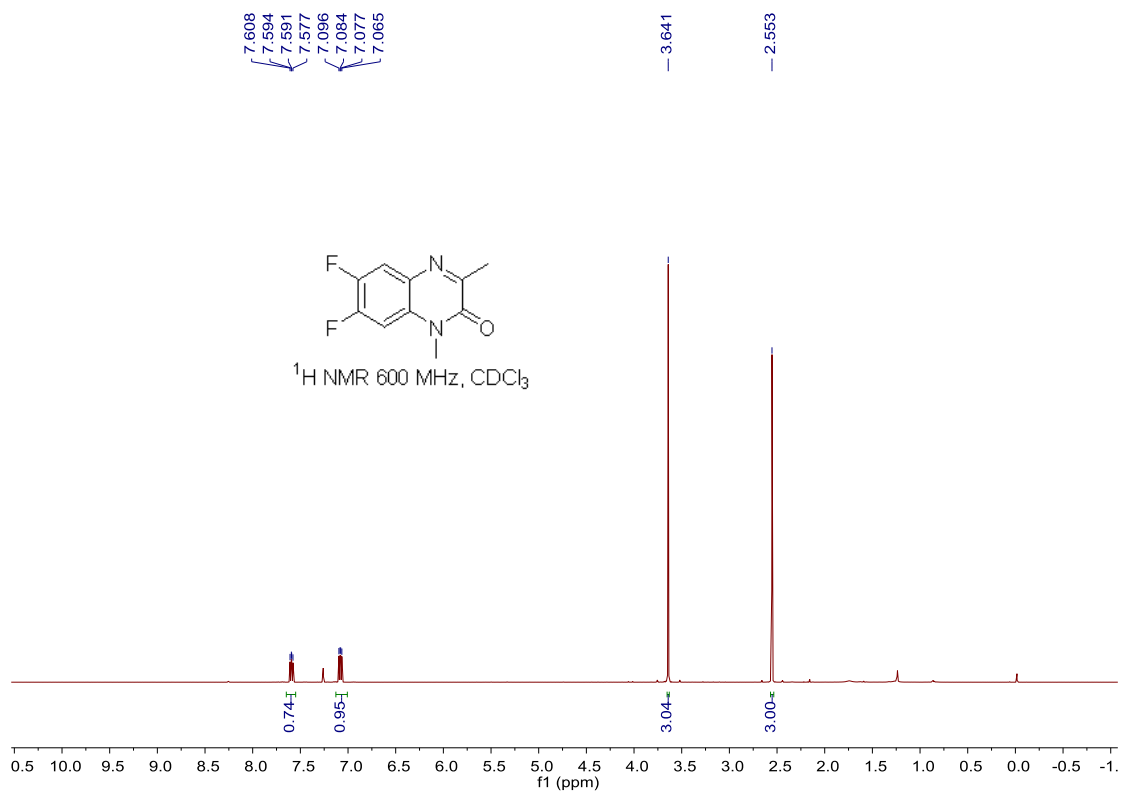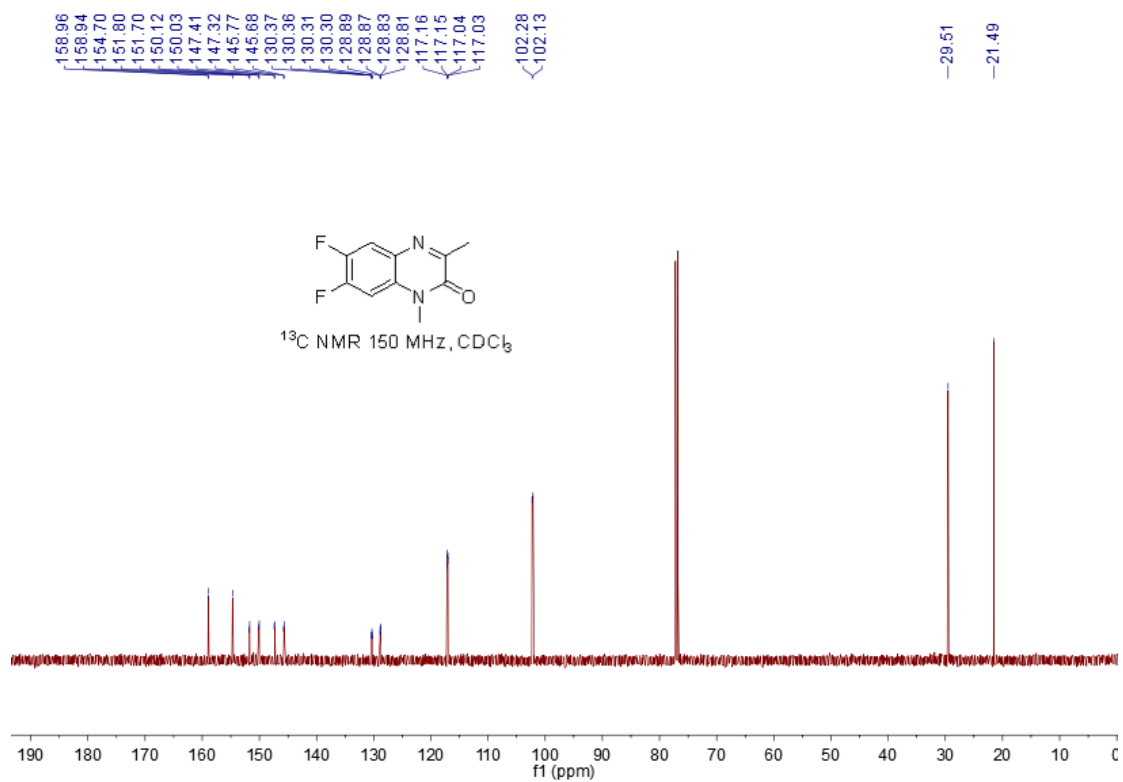

-132.16  
-132.18  
-132.19  
-132.21  
-132.22  
-132.24  
-132.25  
-132.27  
-142.57  
-142.59  
-142.60  
-142.62  
-142.63  
-142.65  
-142.66  
-142.68

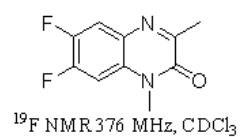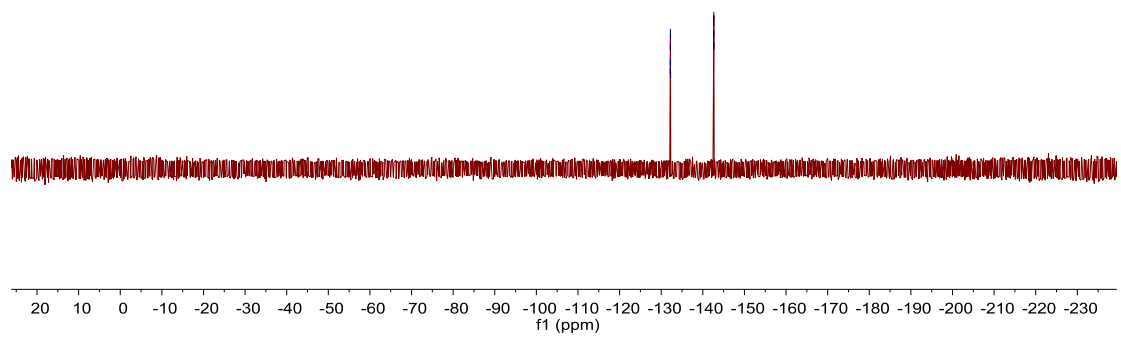

NMR copies of compound **3t**:

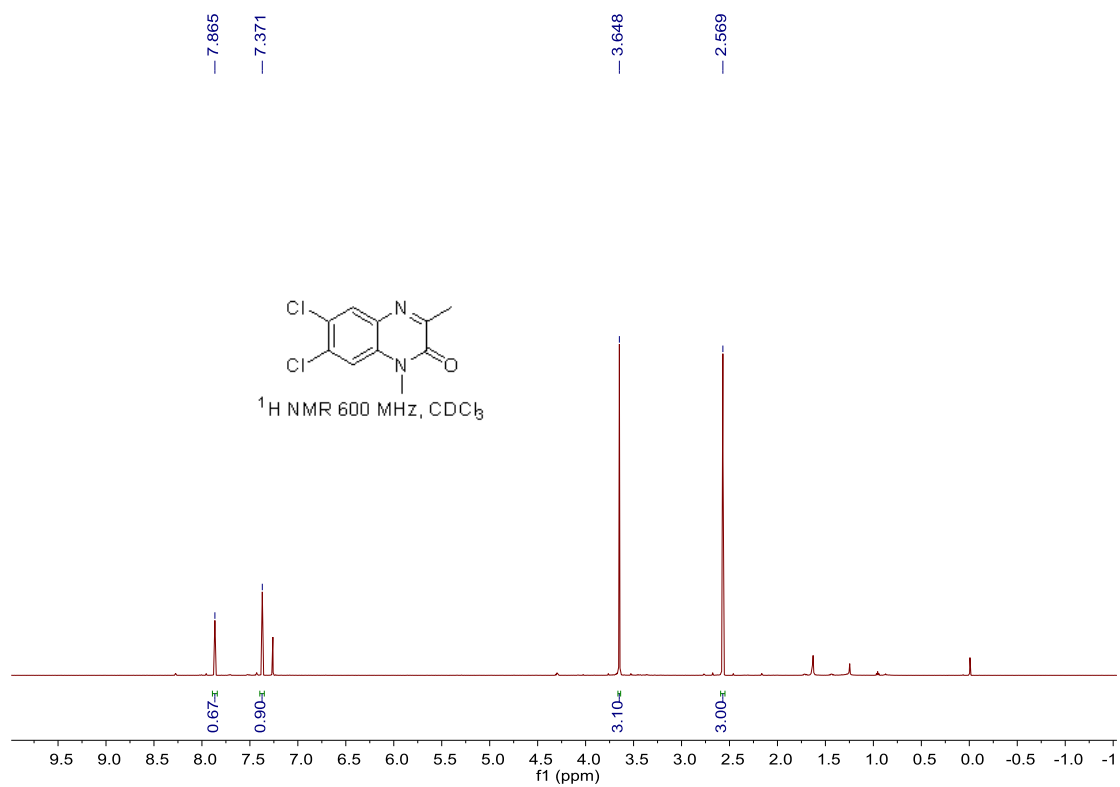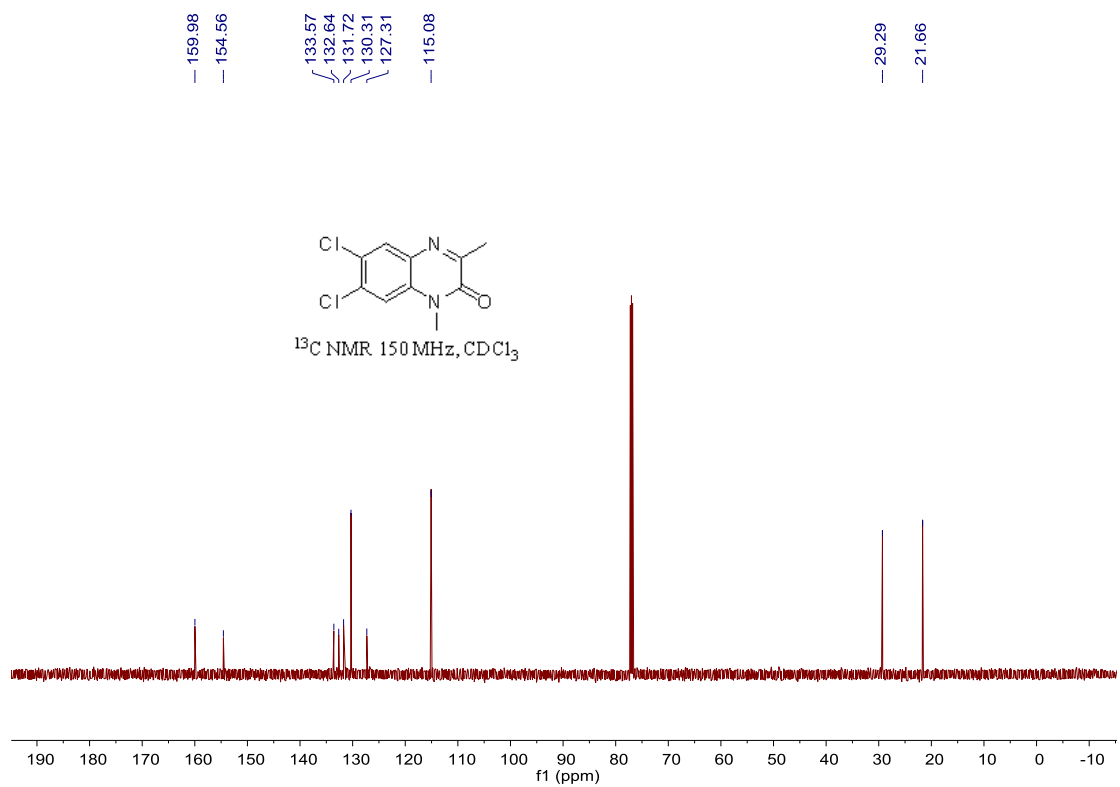

NMR copies of compound **3u**:

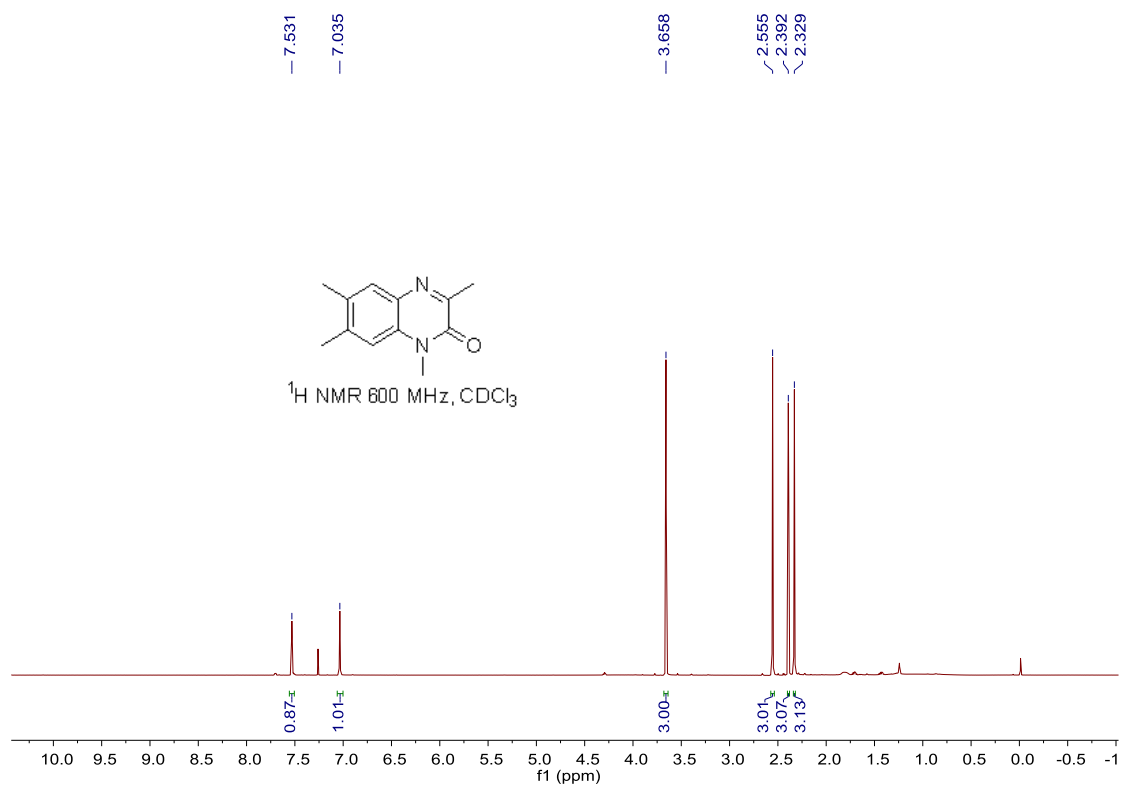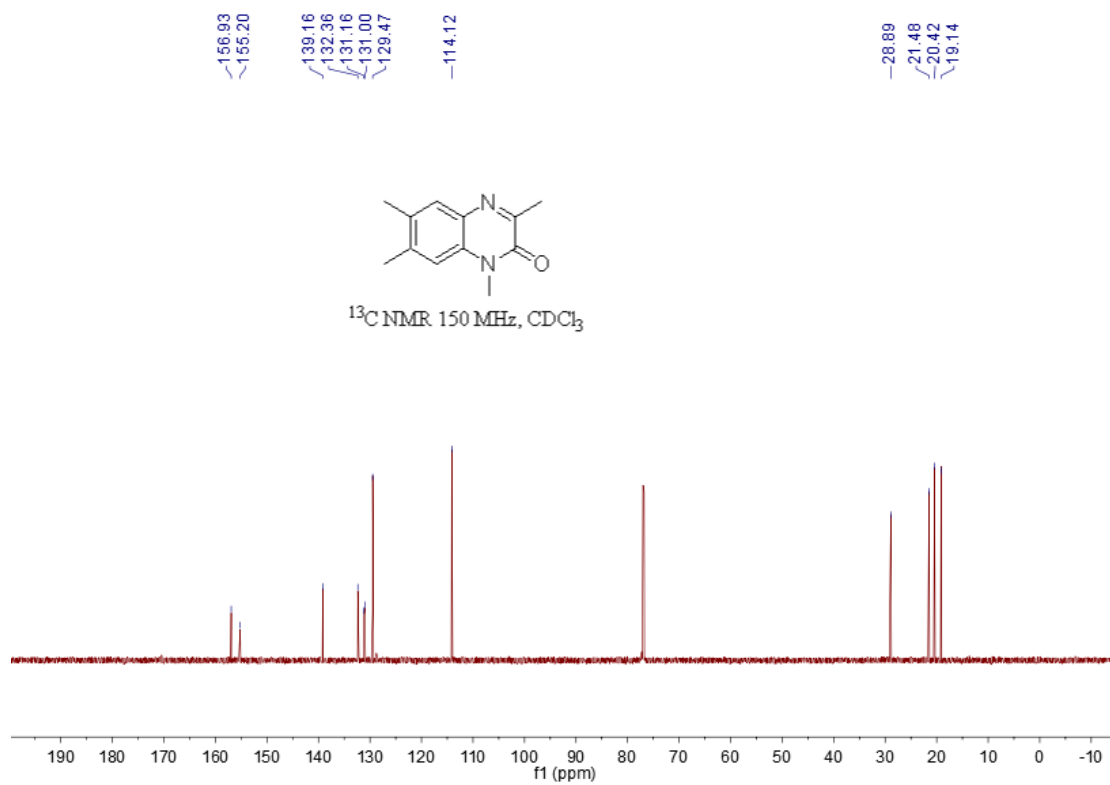

## 6. NMR copies of compounds 5.

NMR copies of compound **5a**:

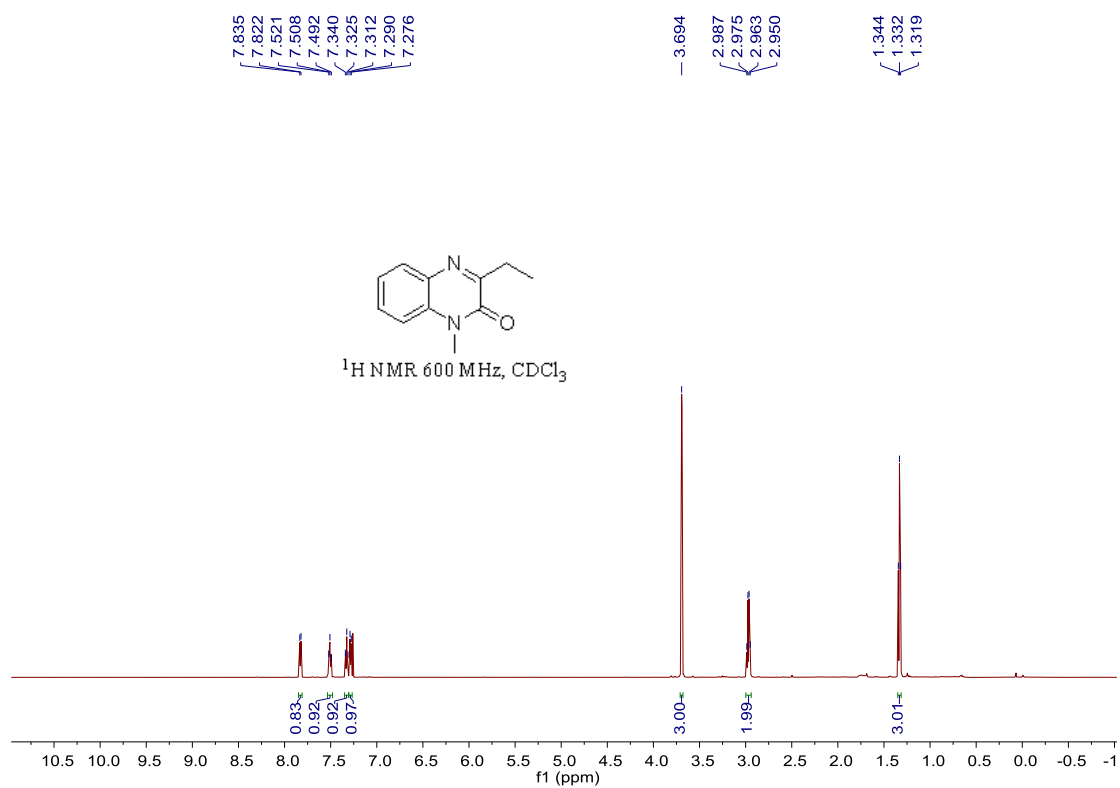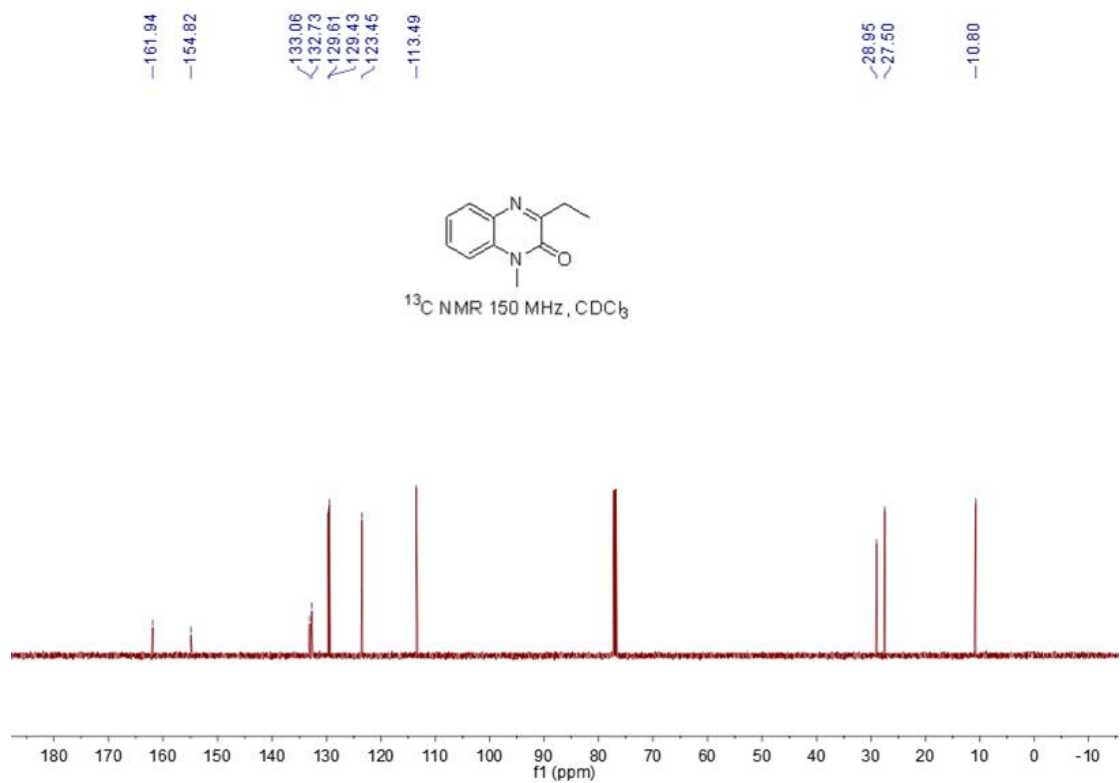

NMR copies of compound **5b**:

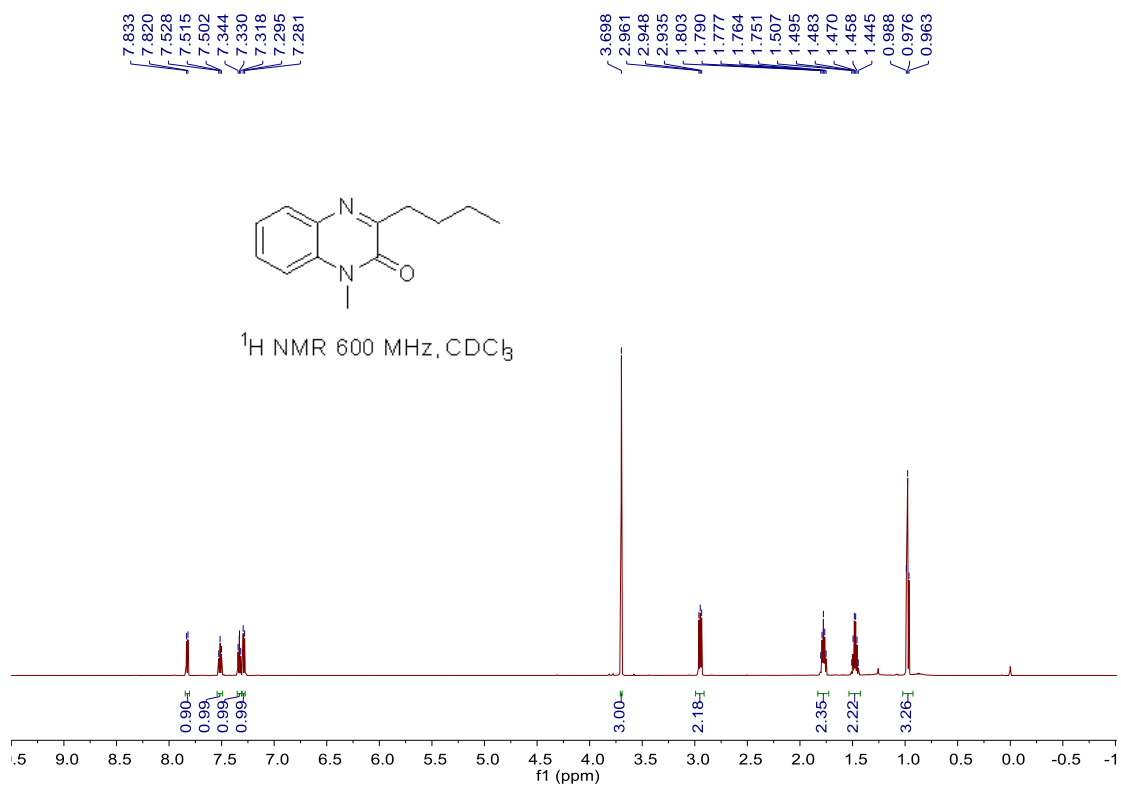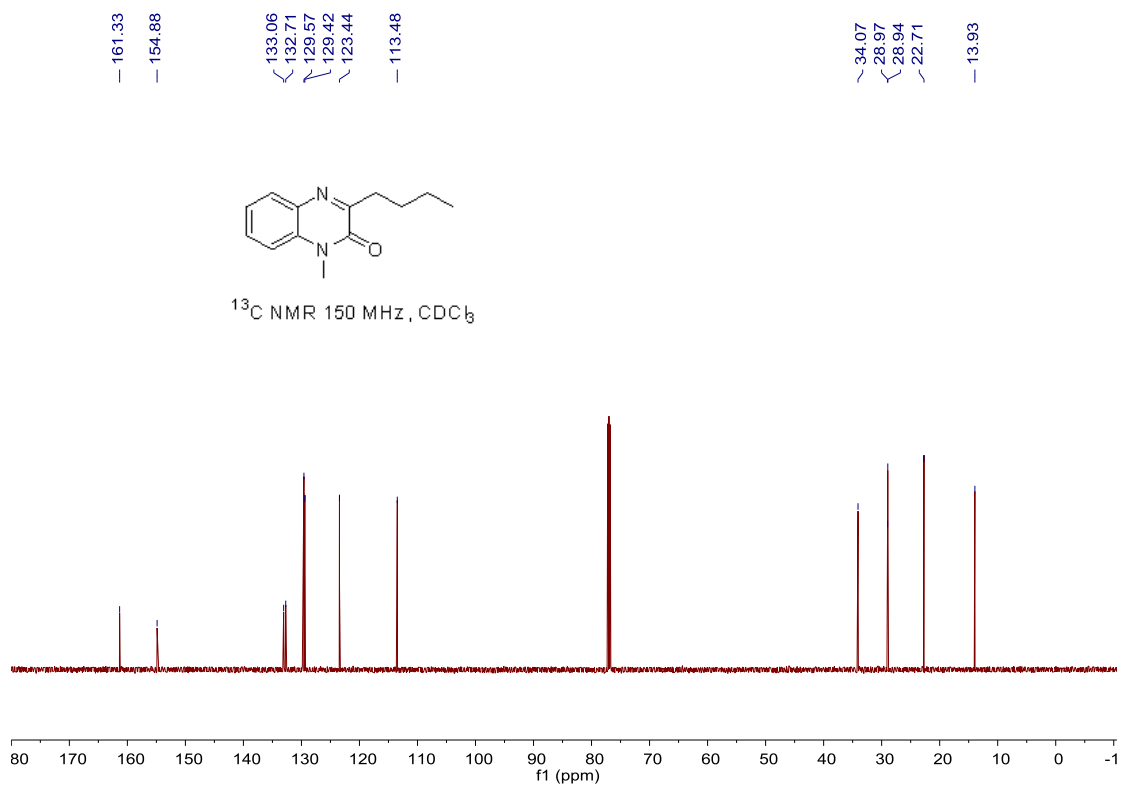



NMR copies of compound **5c**:

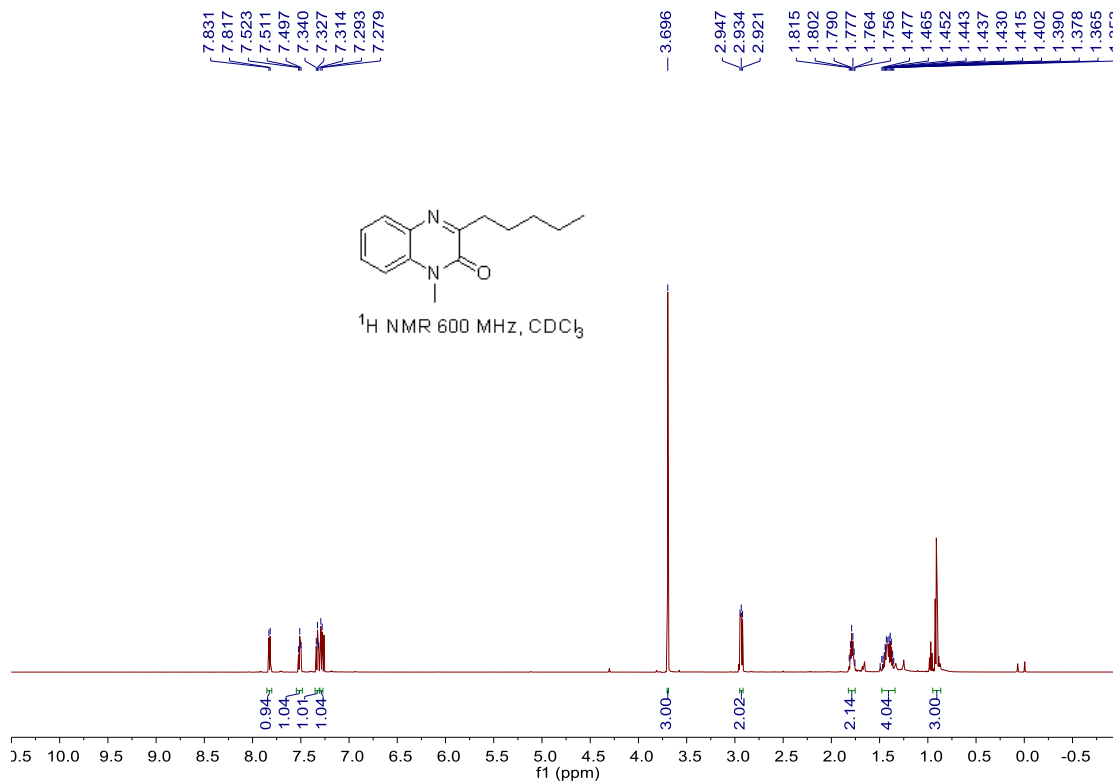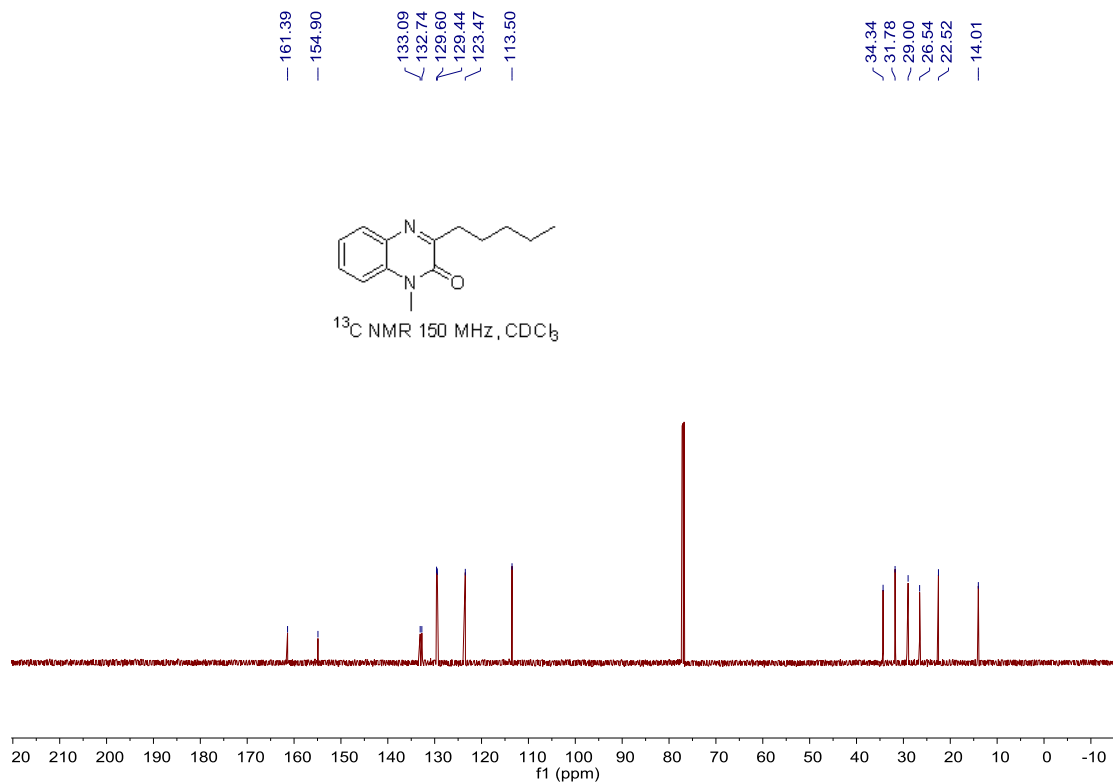

NMR copies of compound **5d**:

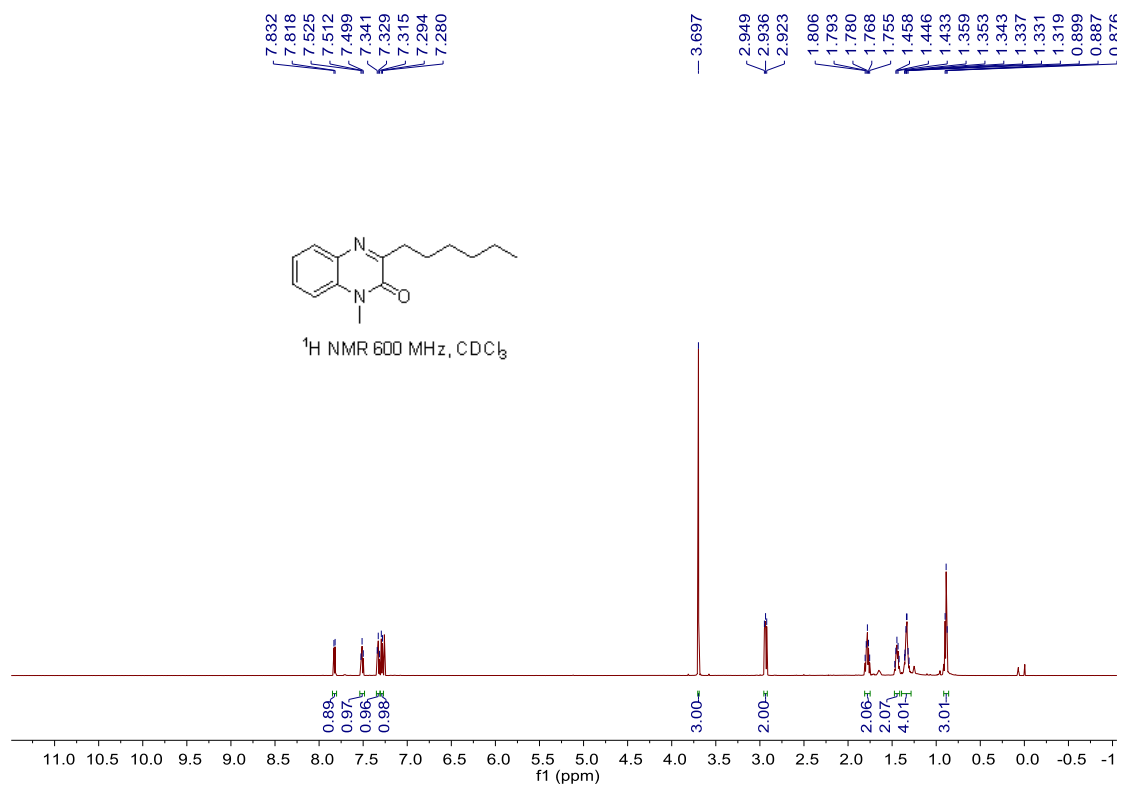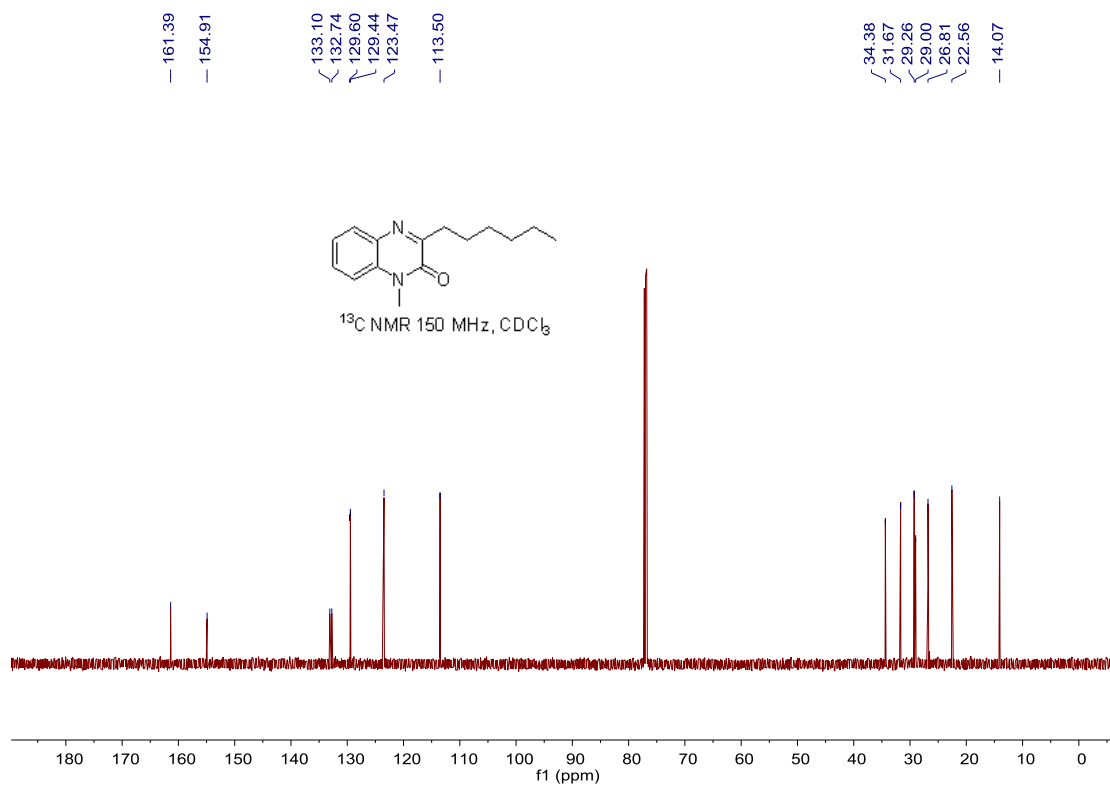

NMR copies of compound **5e**:

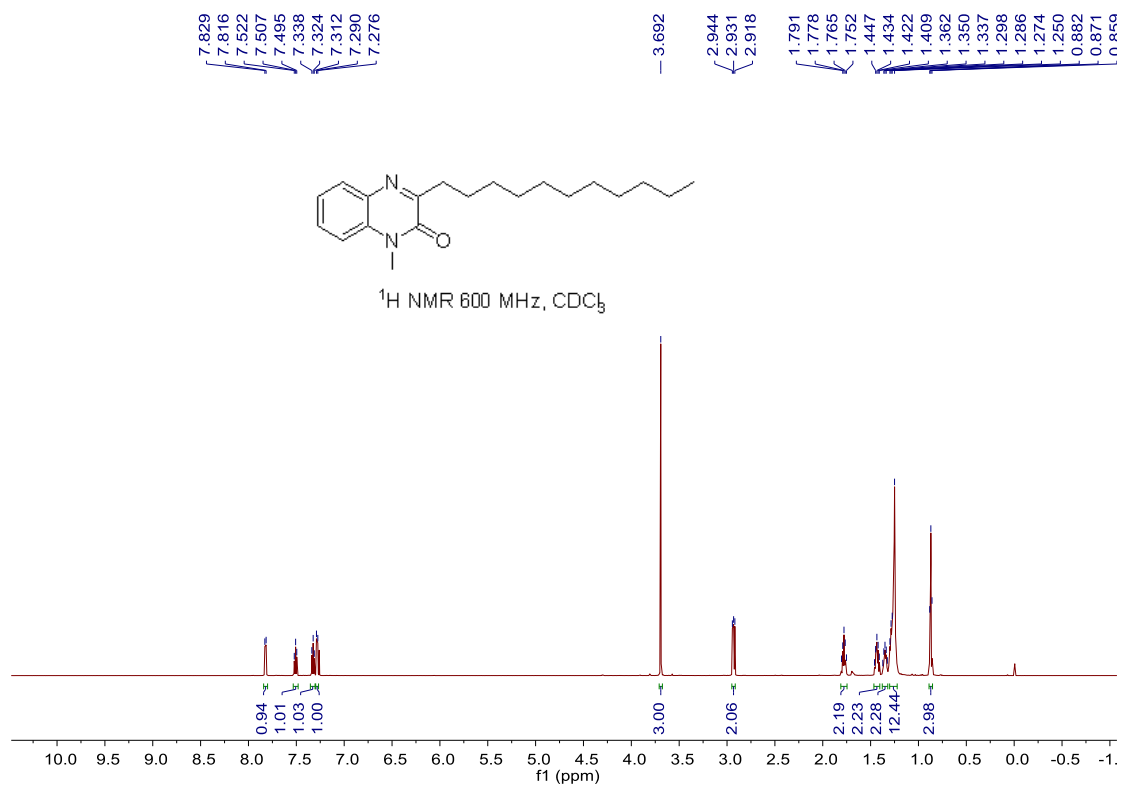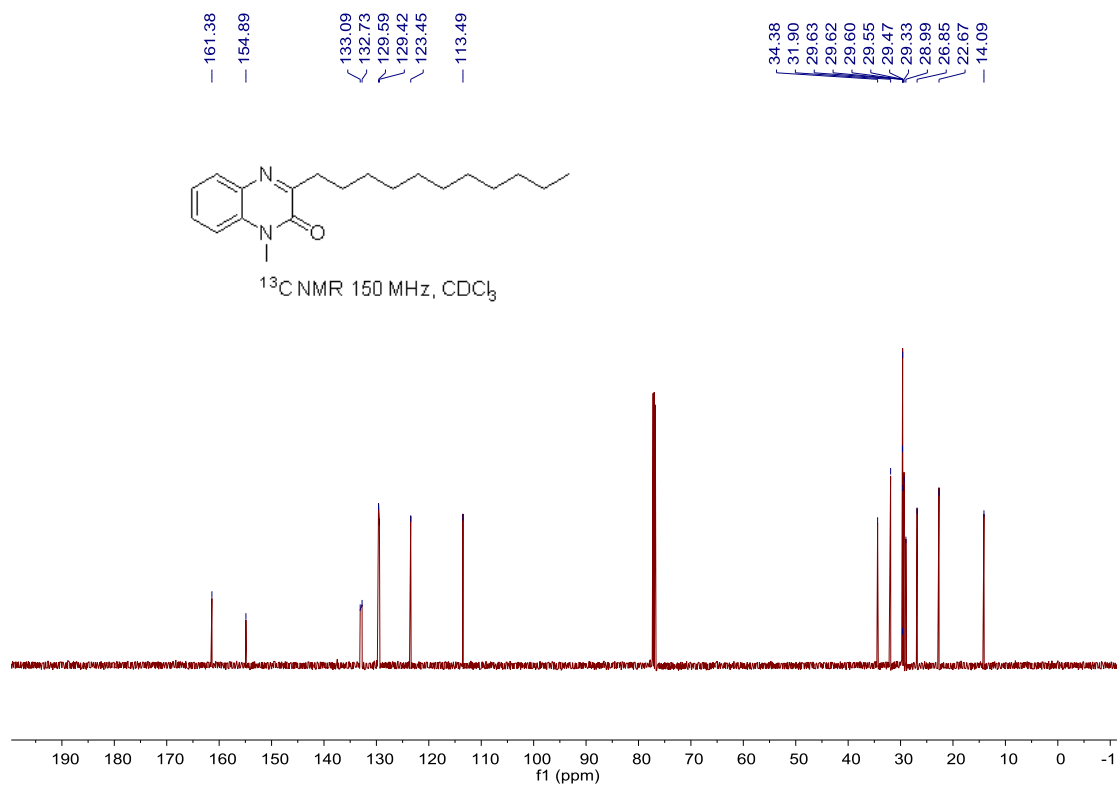

NMR copies of compound **5f**:

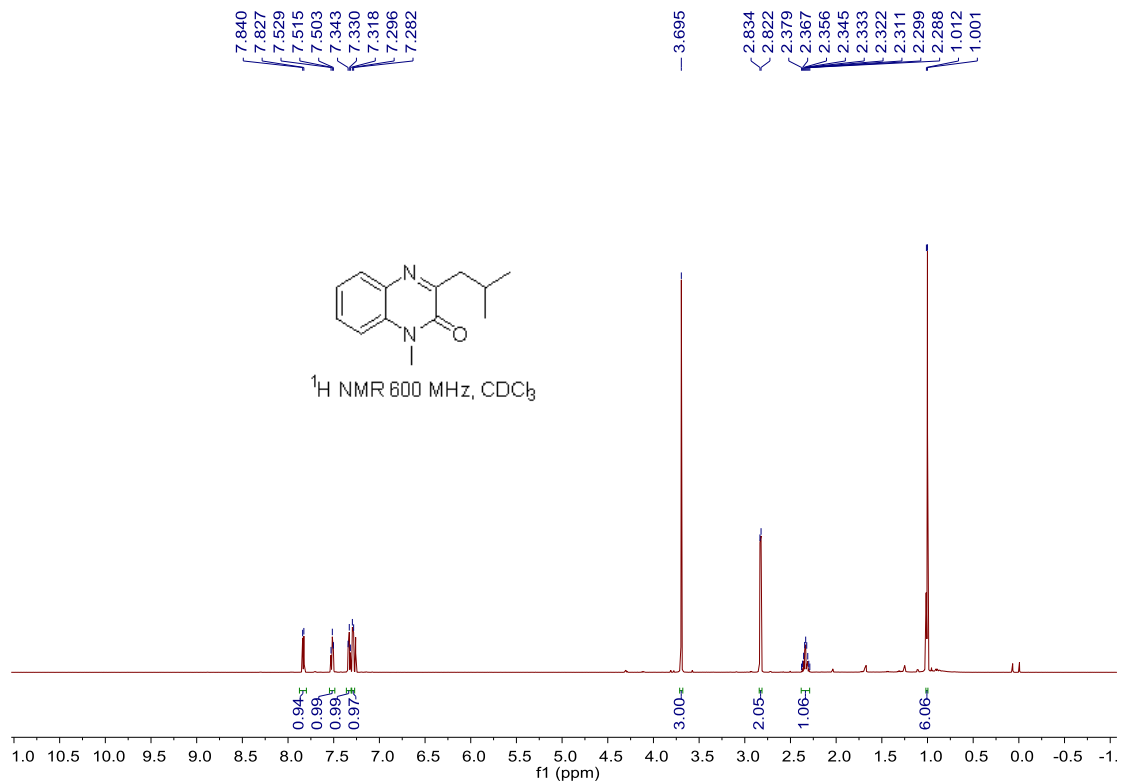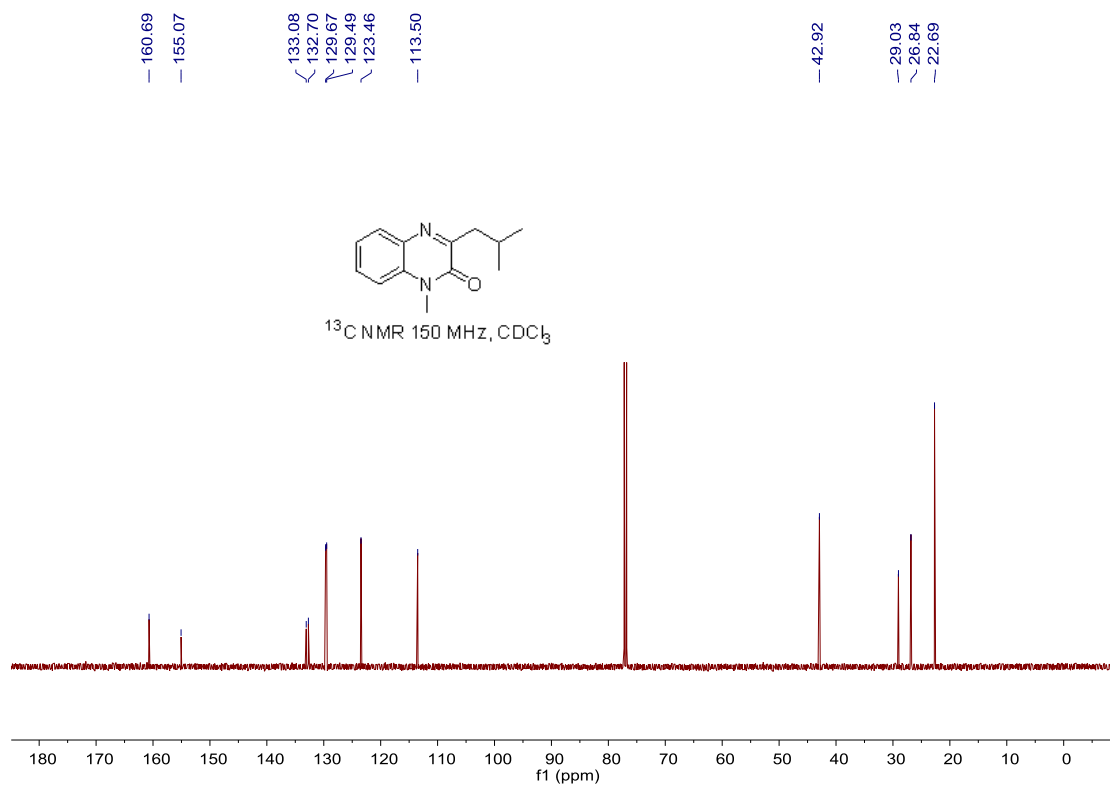

NMR copies of compound **5g**:

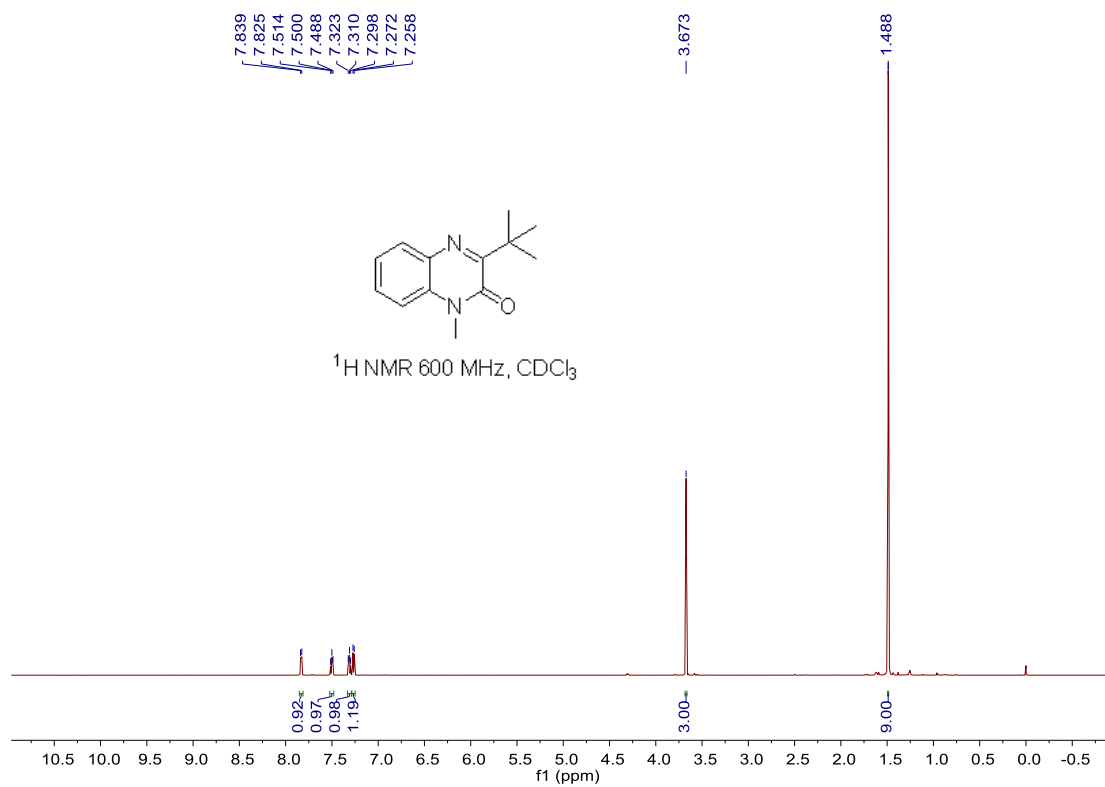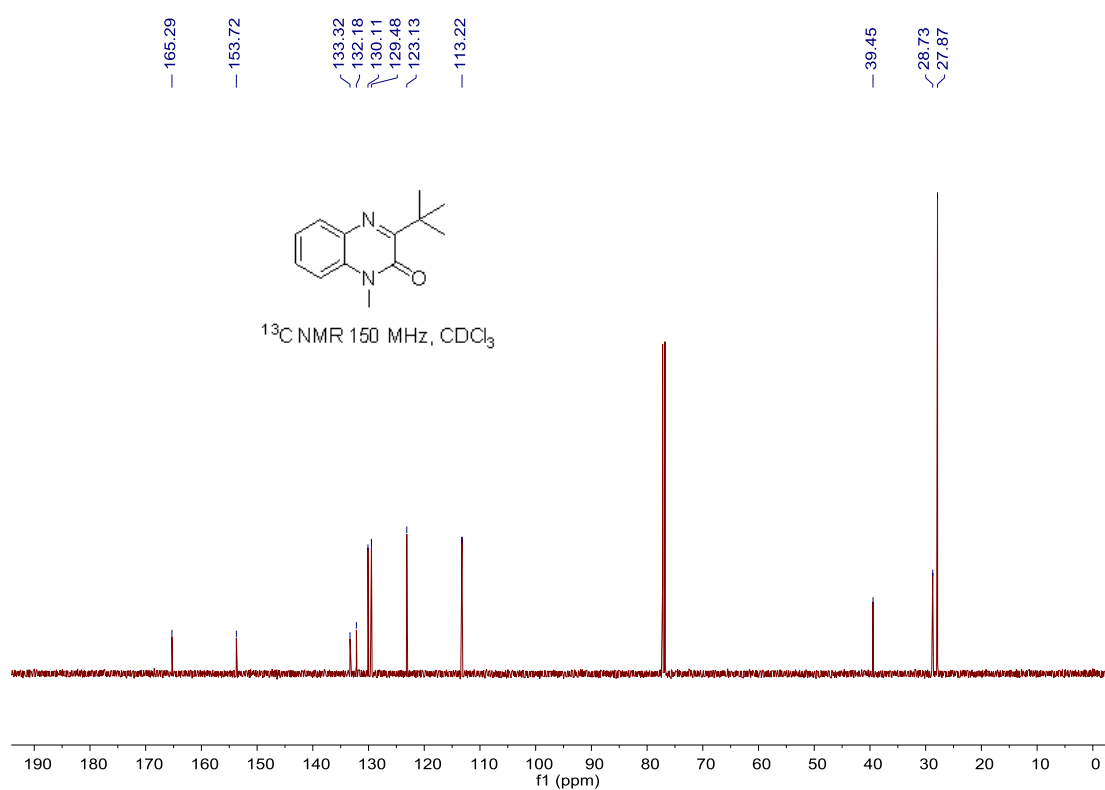

NMR copies of compound **5h**:

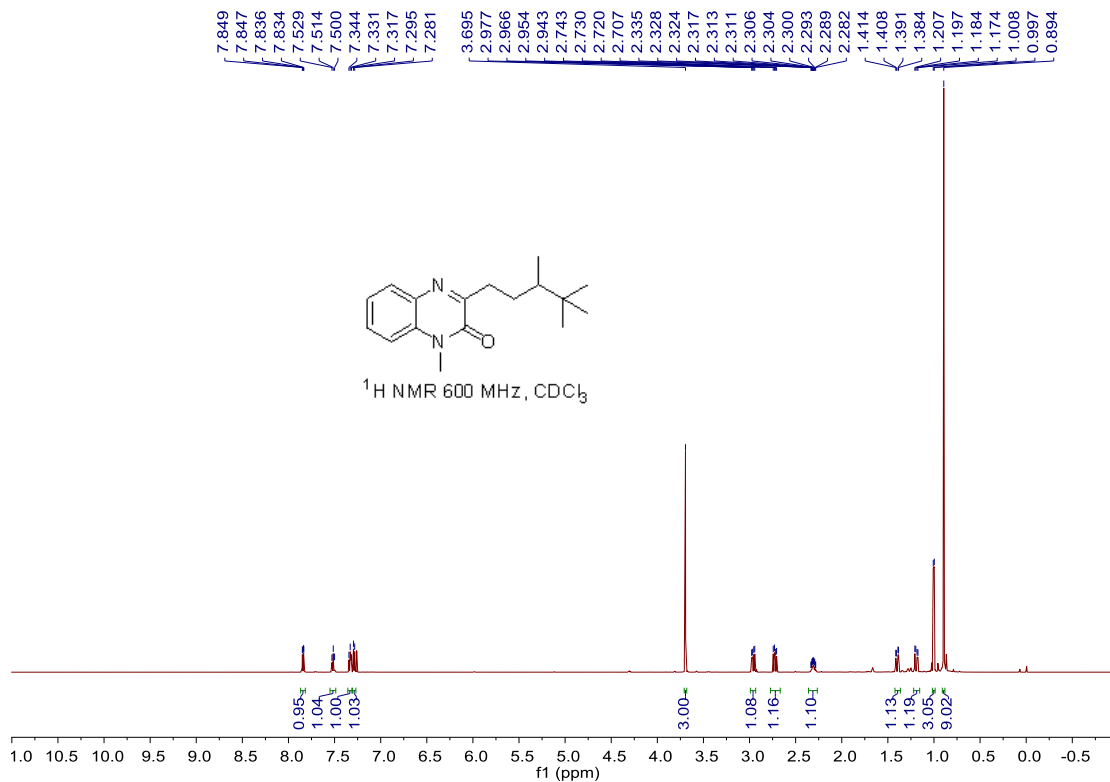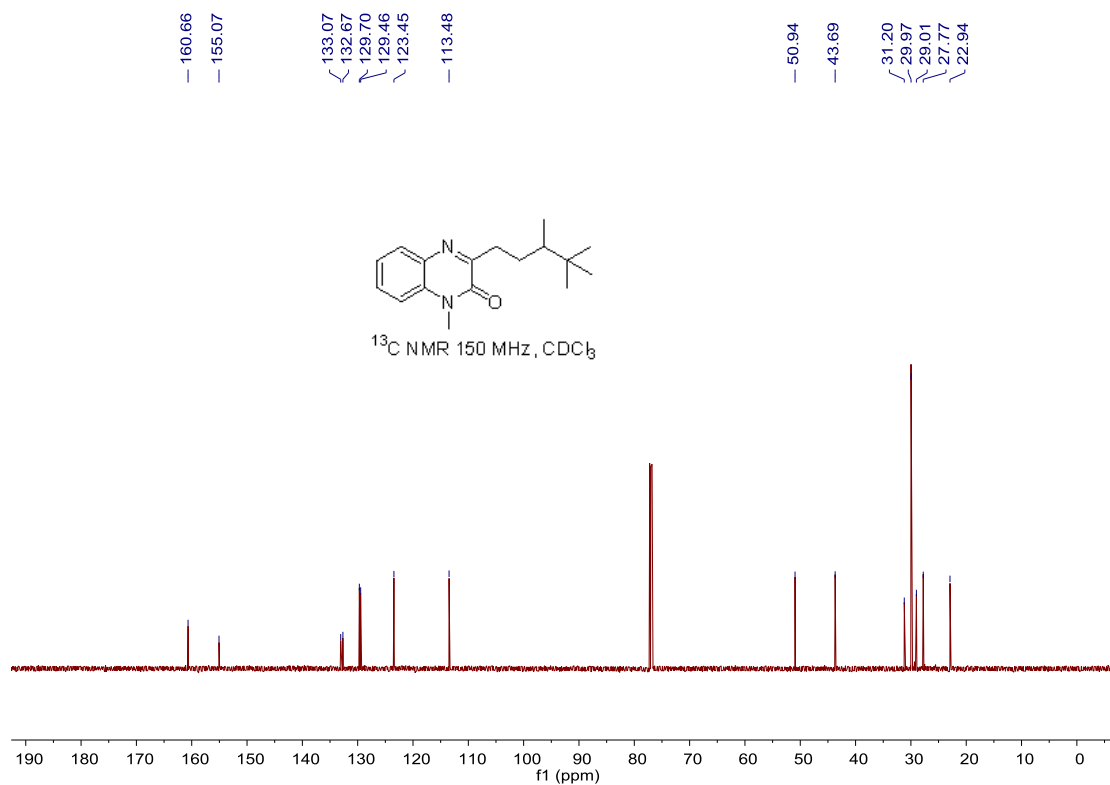

NMR copies of compound **5i**:

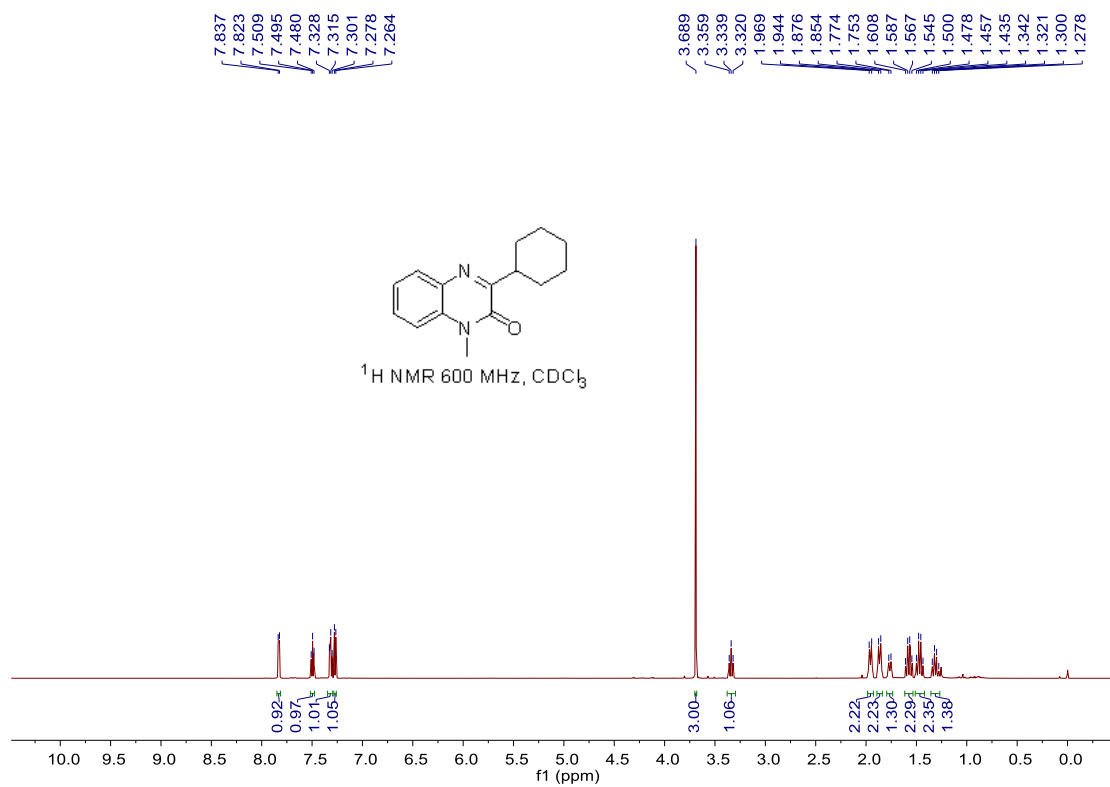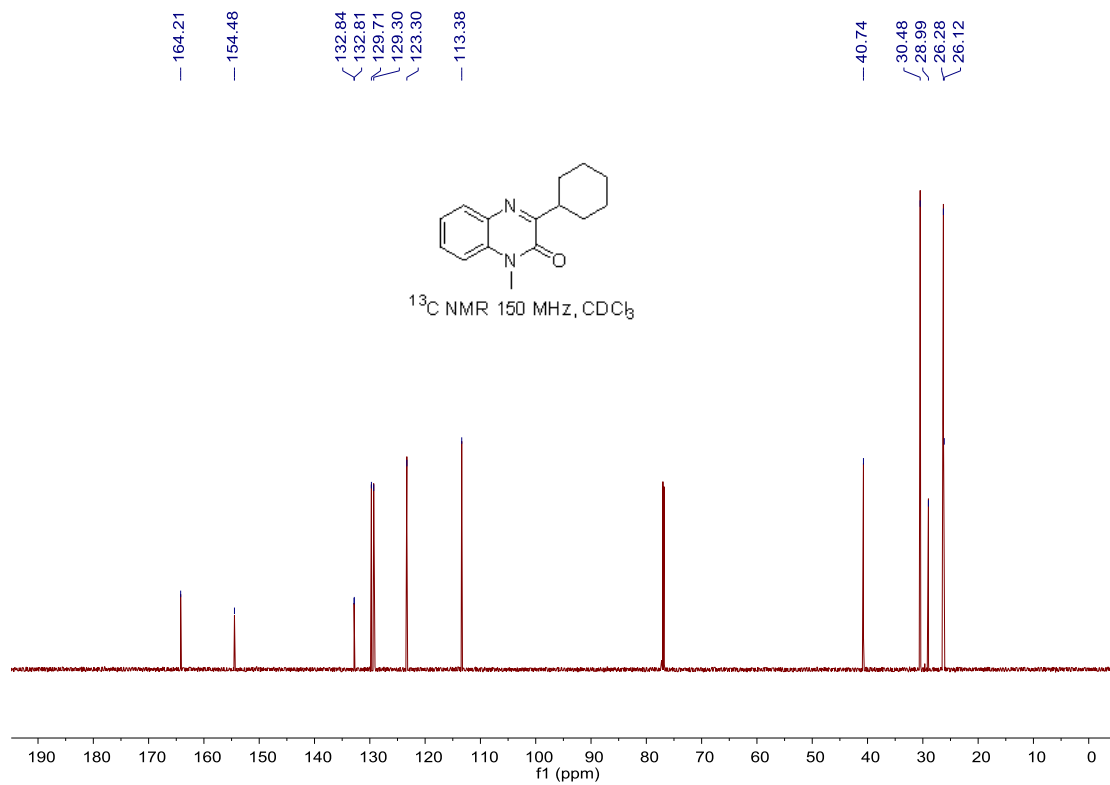

NMR copies of compound **5j**:

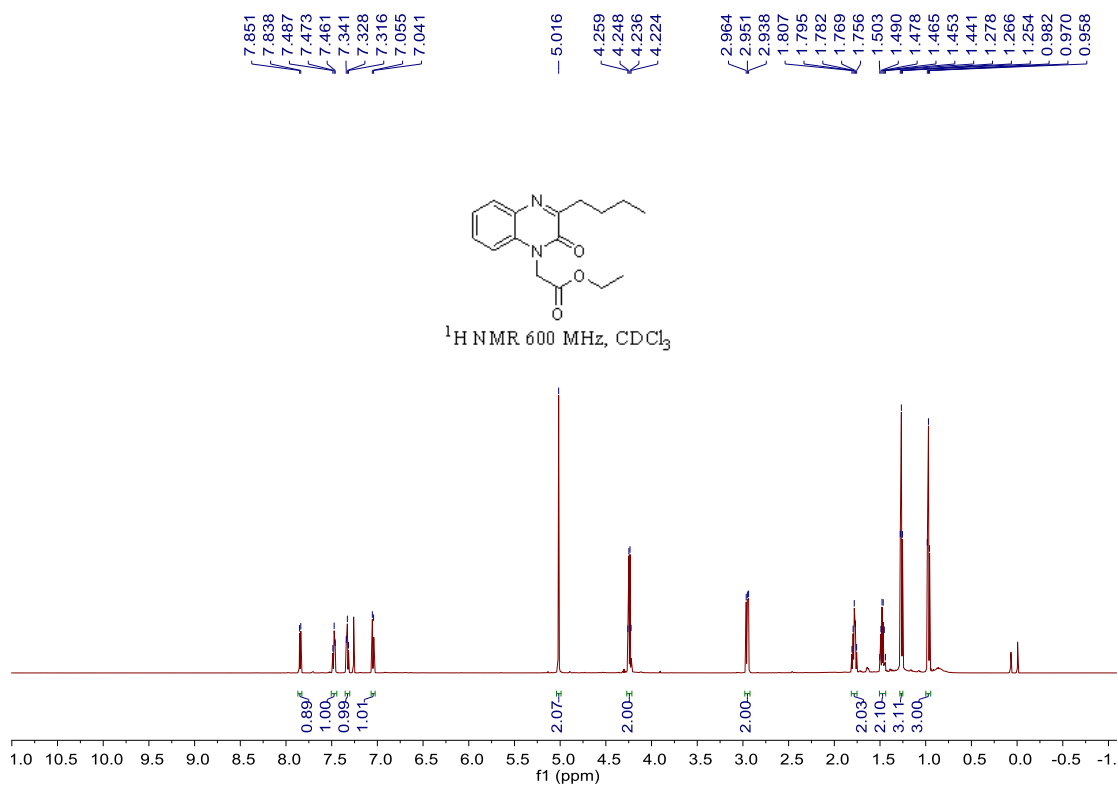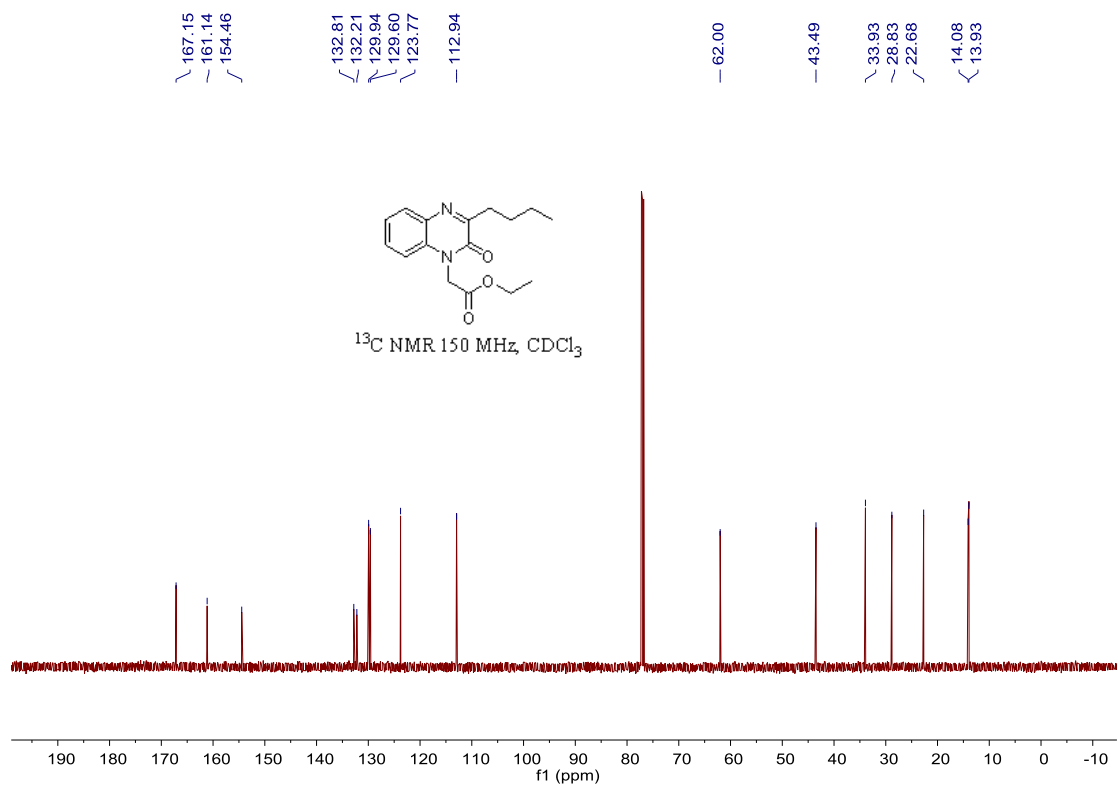



NMR copies of compound **5k**:

7.874  
7.868  
7.865  
7.858  
7.623  
7.610  
7.597  
7.558  
7.545  
7.533  
7.307  
7.302  
7.297  
7.295  
7.291  
7.281  
6.674  
6.666  
6.656  
6.650  
6.644

2.995  
2.982  
2.969  
1.851  
1.839  
1.826  
1.813  
1.800  
1.527  
1.515  
1.502  
1.490  
1.477  
1.465  
0.996  
0.984  
0.971

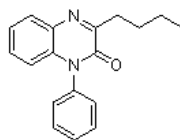

$^1\text{H}$  NMR 600 MHz,  $\text{CDCl}_3$

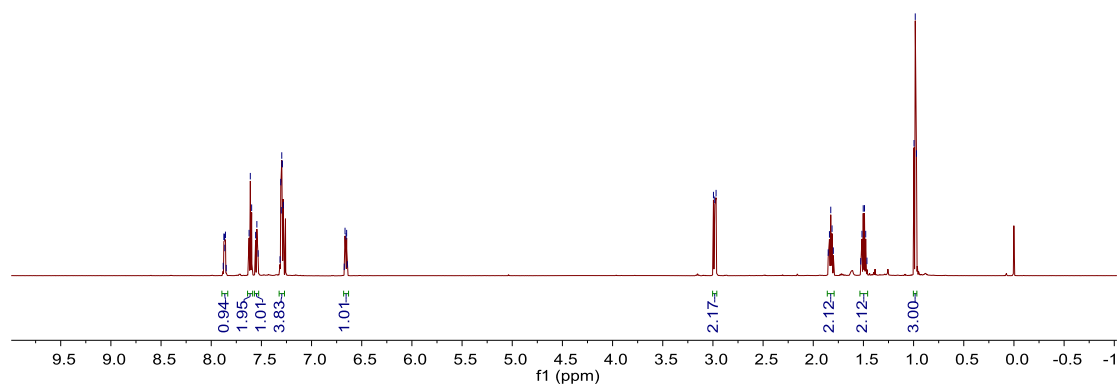

162.17  
154.61  
135.94  
133.93  
132.58  
130.21  
129.30  
129.21  
129.08  
128.27  
123.63  
115.34  
33.93  
28.95  
22.75  
13.94

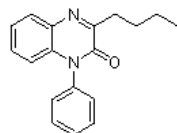

$^{13}\text{C}$  NMR 150 MHz,  $\text{CDCl}_3$

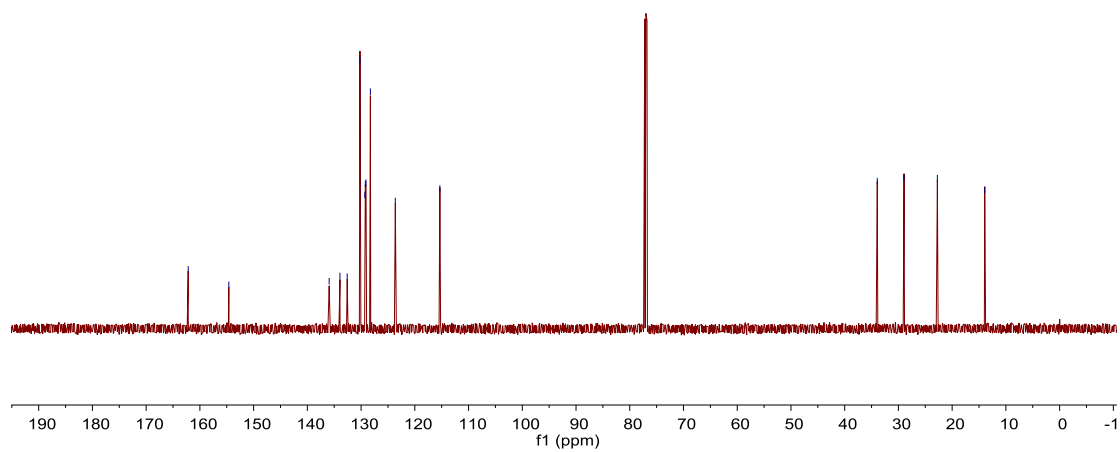

# NMR copies of compound 51:

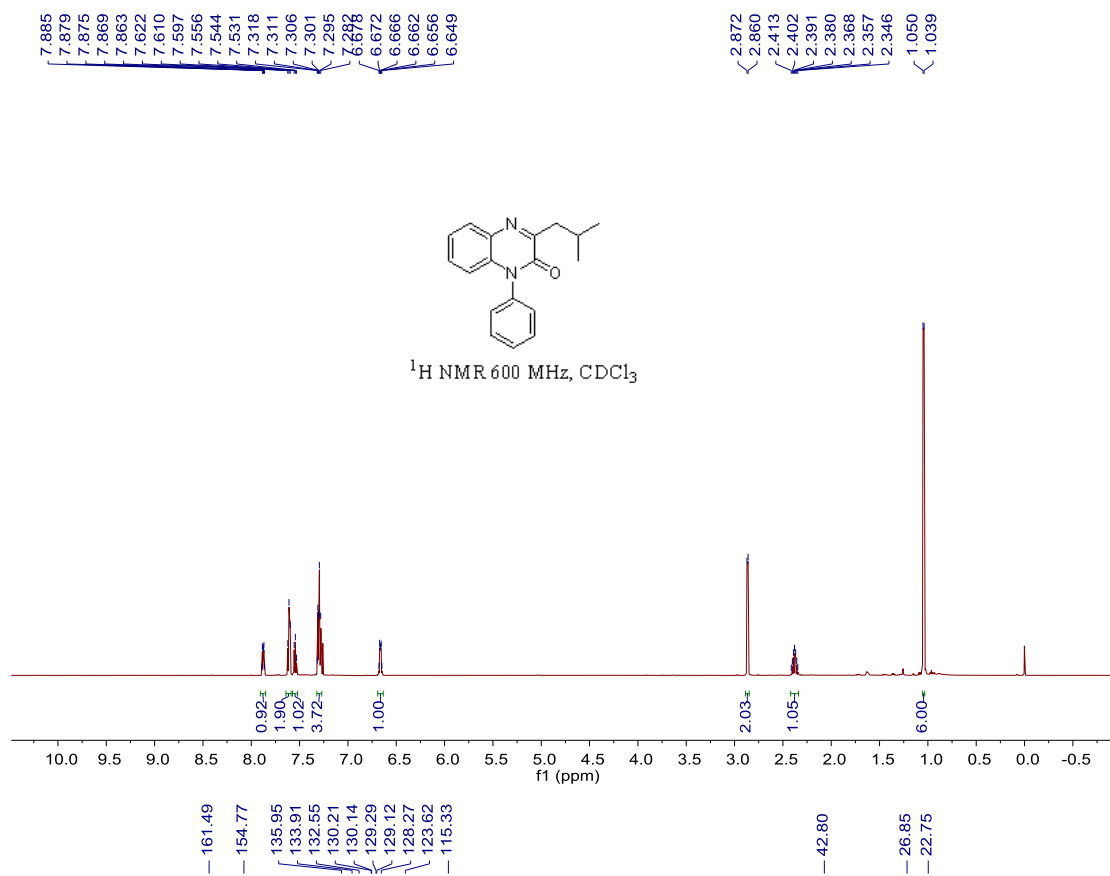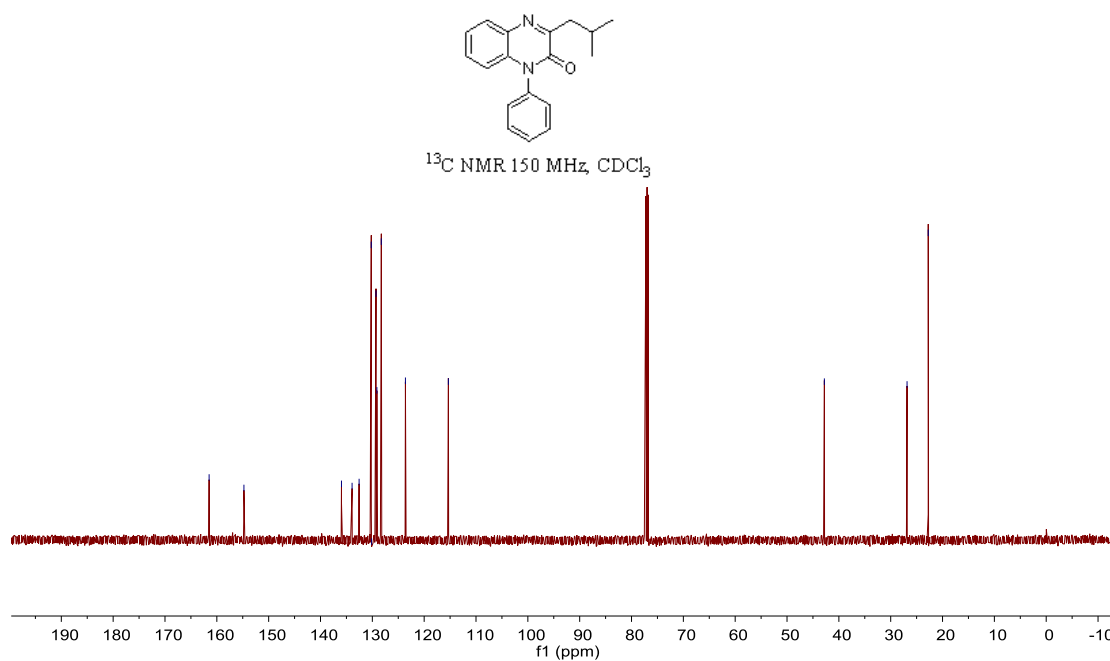

NMR copies of compound **5m**:

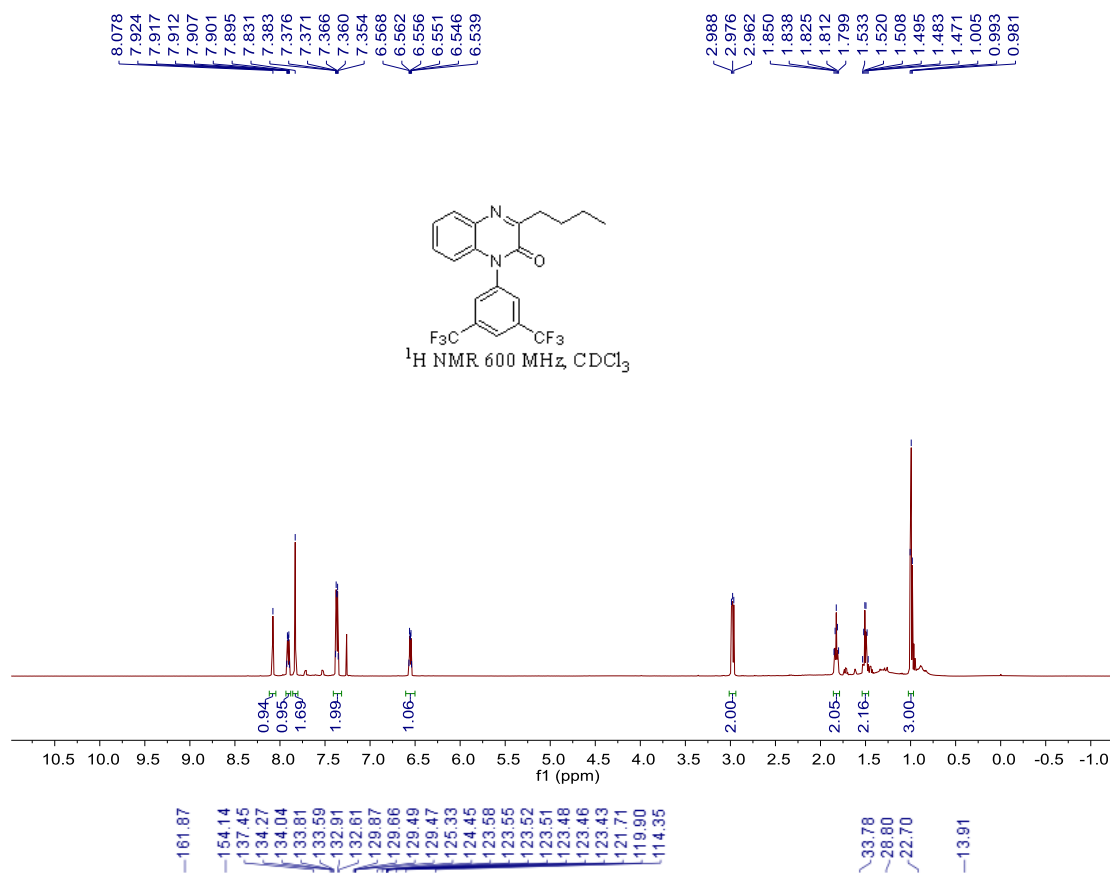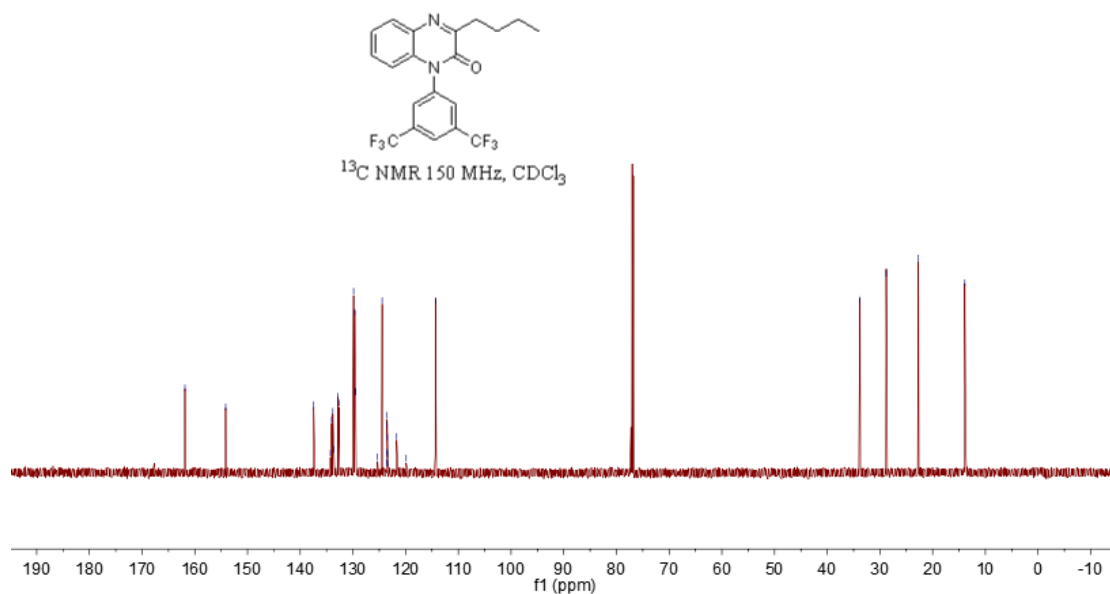

137.45  
 134.27  
 134.04  
 133.81  
 133.59  
 132.91  
 132.61  
 129.87  
 129.66  
 129.49  
 129.47  
 125.33  
 124.45  
 123.58  
 123.55  
 123.52  
 123.51  
 123.48  
 123.46  
 123.43  
 121.71  
 119.90  
 114.35

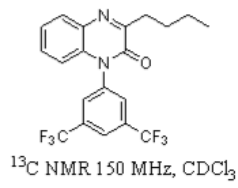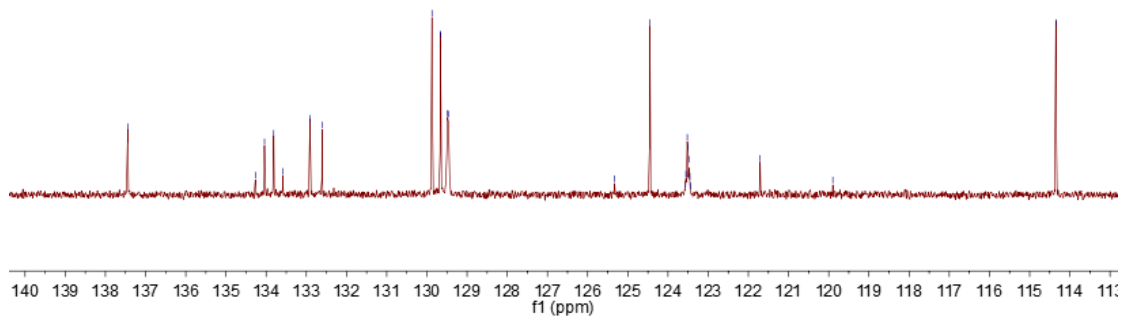

-63.25

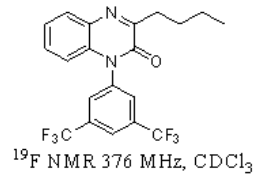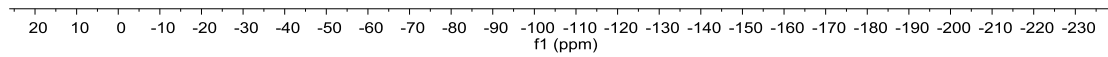

## 7. NMR copies of compound 6.

NMR copies of compound 6:

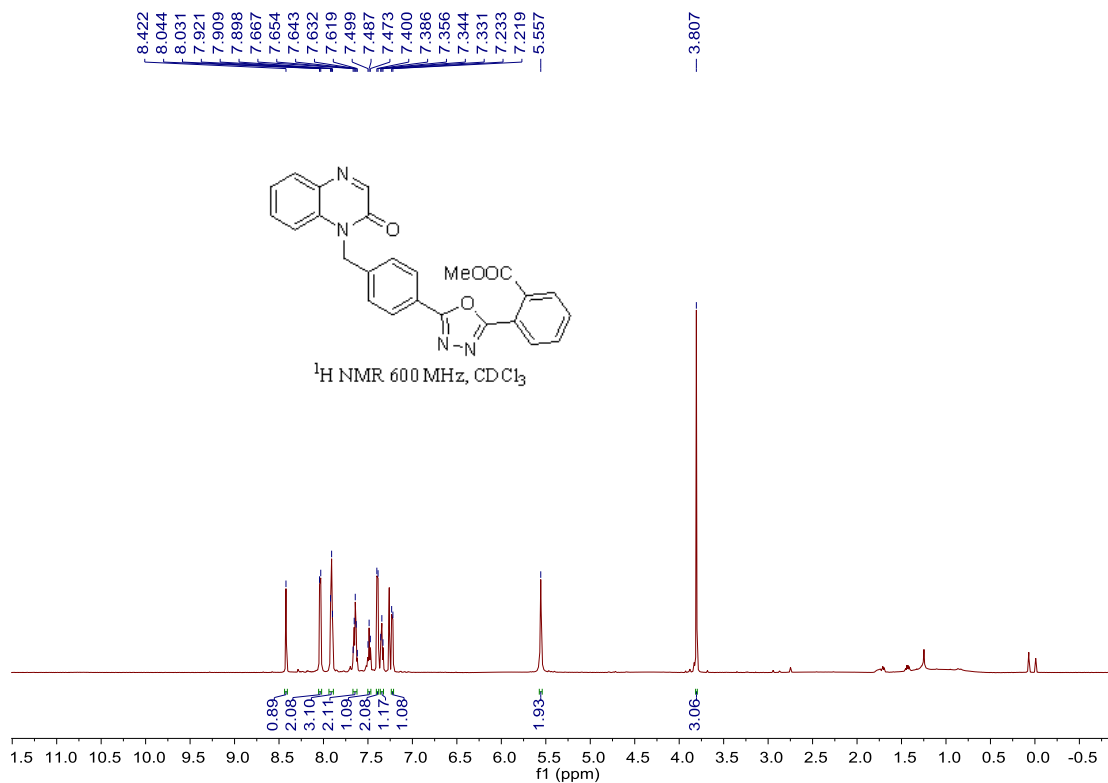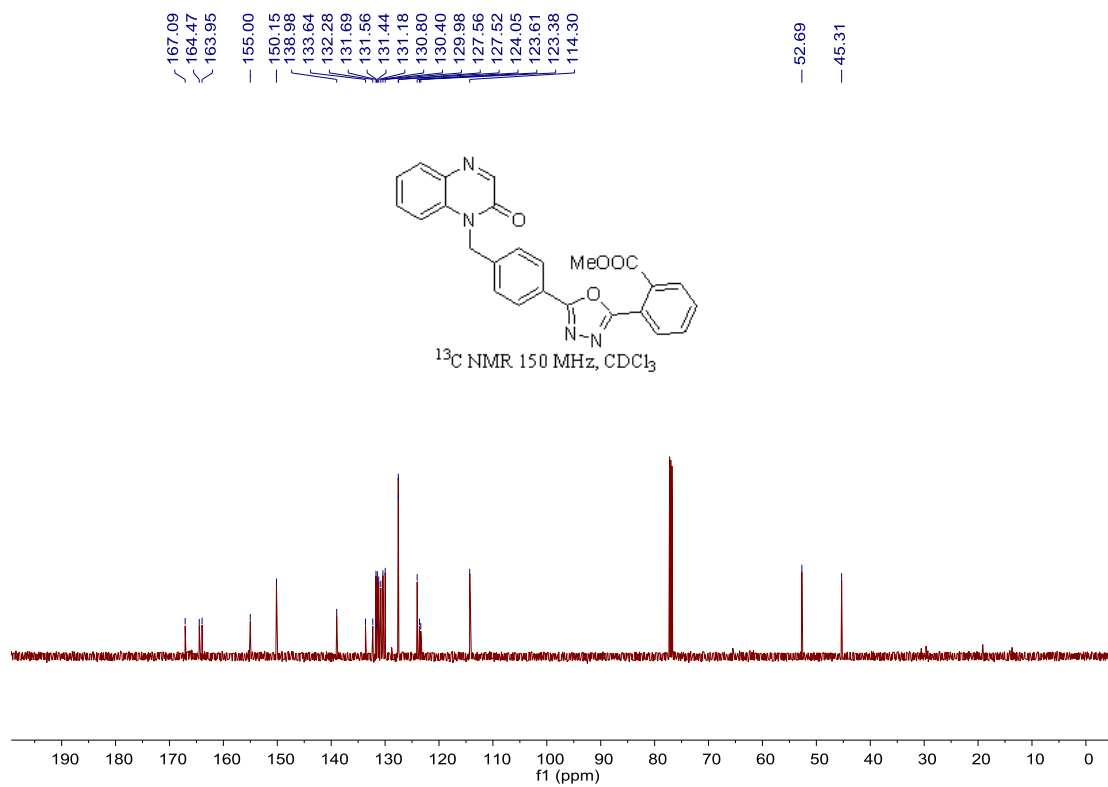

## 8. NMR copies of compounds 7.

NMR copies of compound **7a**:

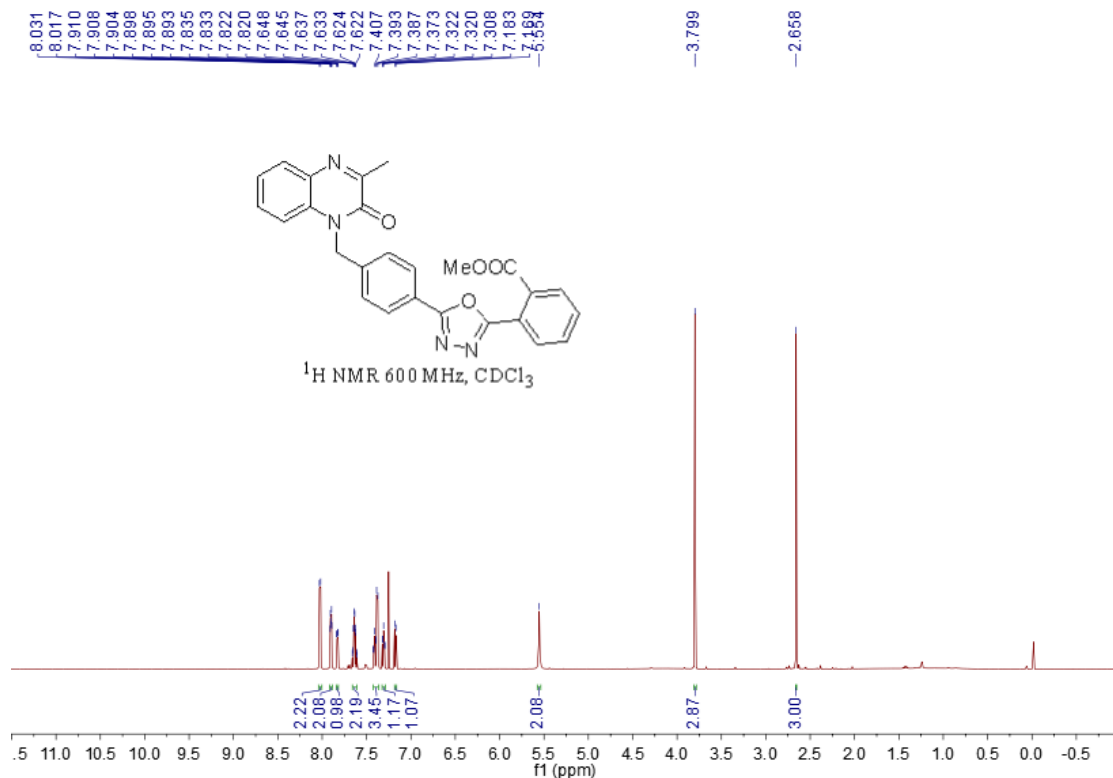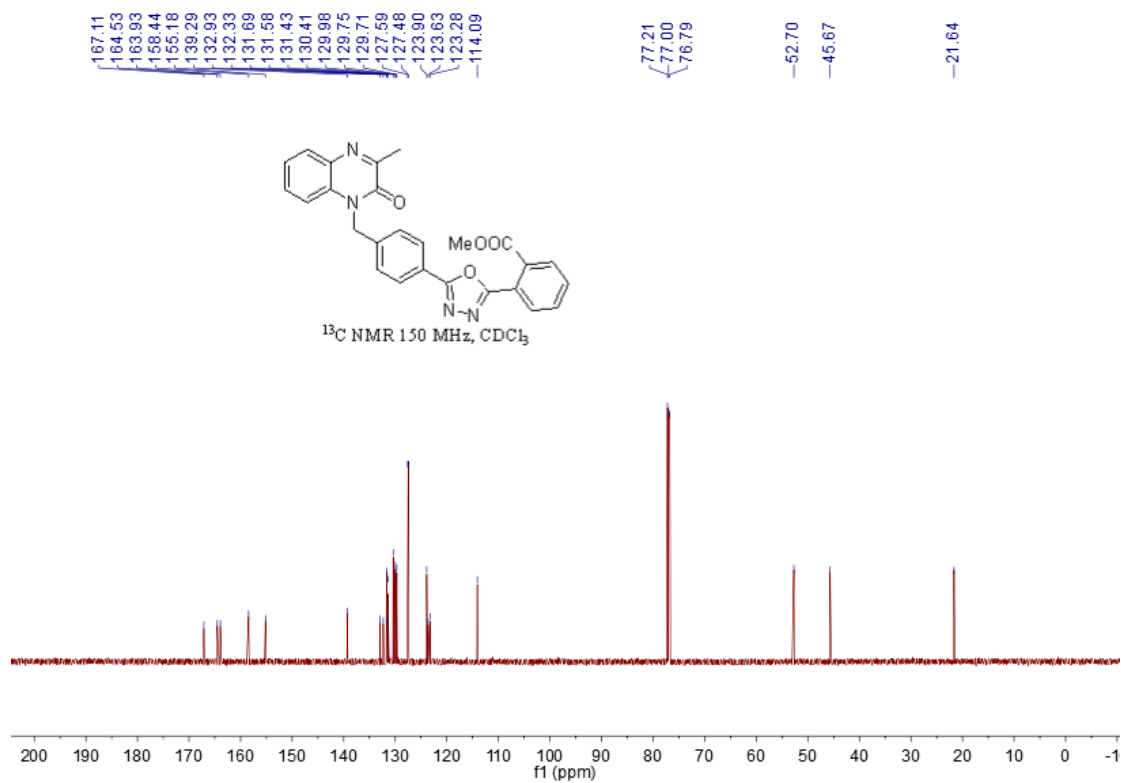

NMR copies of compound **7b**:

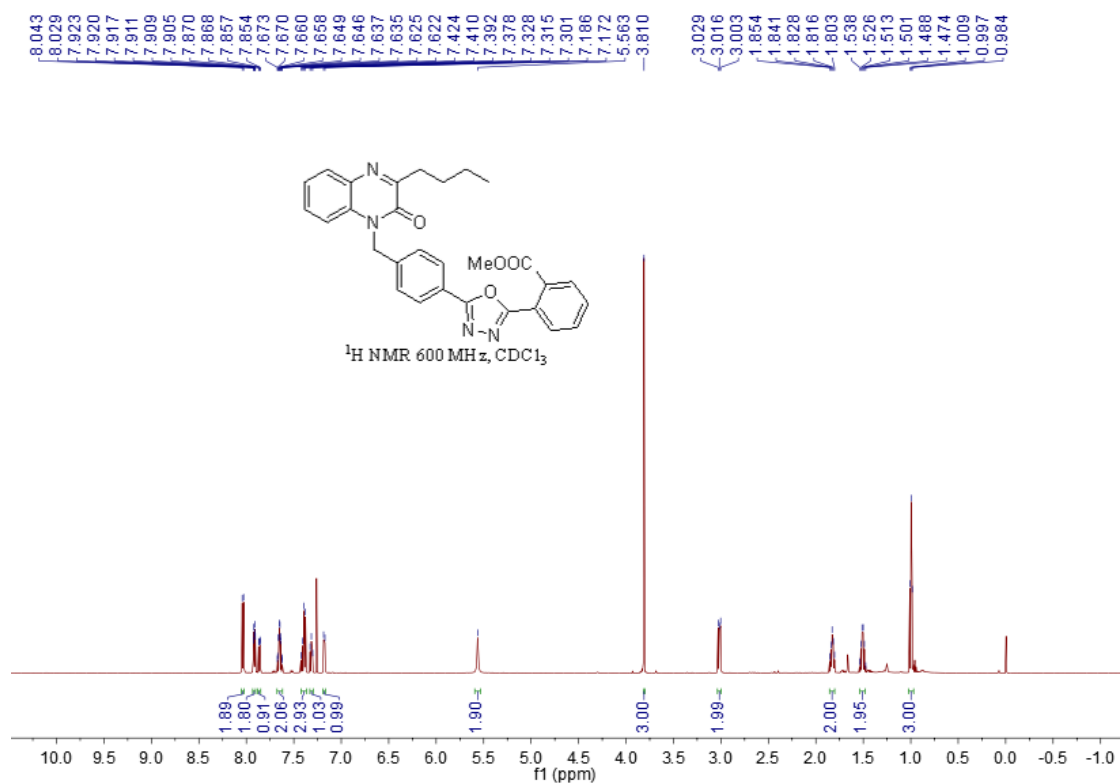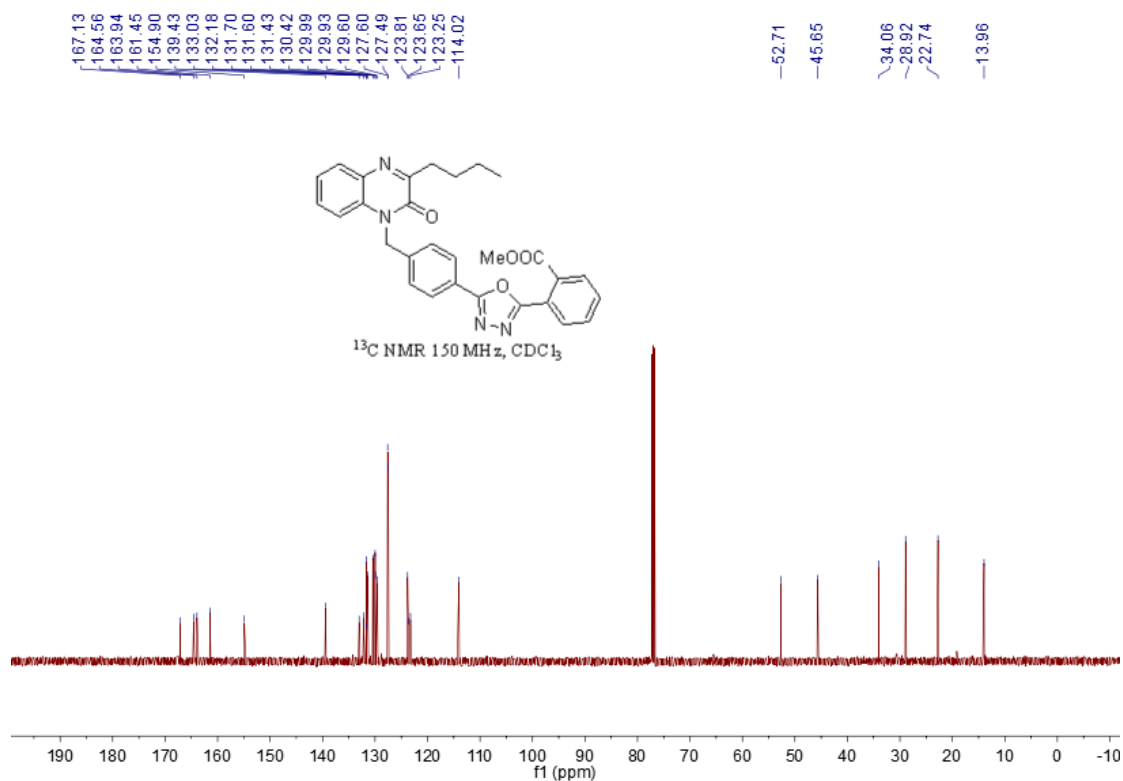

Supplement: c9ob01169b1.pdf [file c9ob01169b1.pdf]
